# Supplementary material for: Direct C–H difluoroallylation of α,β-unsaturated amides and aryl amides by rhodium catalysis
Source: Royal Society of Chemistry journal article supplement (doi:10.1039/d4cc03804e), 2024-01-01

## Supporting Information

### Direct C–H Difluoroallylation of $\alpha,\beta$ -Unsaturated Amides and Aryl Amides by Rhodium catalysis

Wenqian Ding,<sup>a,c,#</sup> Wanqi Hu,<sup>b,c,#</sup> Xingyu Chen,<sup>d,c</sup> Yan Wang,<sup>c,e</sup> Xueqing Liu,<sup>a,c</sup> Weiqi Liu,<sup>f,g</sup> and Xiaowei Wu<sup>\*a,b,c,d,f,g</sup>

<sup>a</sup>Guangzhou University of Chinese Medicine, Guangdong 510006, China

<sup>b</sup>Nanjing University of Chinese Medicine, Nanjing 210023, China

<sup>c</sup>Zhongshan Institute for Drug Discovery, Shanghai Institute of Materia Medica, Chinese Academy of Sciences, Zhongshan 528400, China

<sup>d</sup>School of Pharmaceutical Sciences, Southern Medical University, Guangzhou 510515, China

<sup>e</sup>School of Pharmacy, Guizhou Medical University, Guiyang 550014, China

<sup>f</sup>Drug Discovery and Development Center, Shanghai Institute of Materia Medica, Chinese Academy of Sciences, Shanghai 201203, China

<sup>g</sup>University of Chinese Academy of Sciences, No.19A Yuquan Road, Beijing 100049, China

Email: wuxiaowei@simm.ac.cn

|                                                                                     |     |
|-------------------------------------------------------------------------------------|-----|
| General Information .....                                                           | S2  |
| Preparation of Starting Materials .....                                             | S2  |
| Characterization Data of Substrate <b>1</b> .....                                   | S6  |
| General Procedure for the Synthesis of <b>3</b> .....                               | S6  |
| Characterization Data of Products <b>3</b> .....                                    | S7  |
| General procedure for the preparation of <b>4</b> .....                             | S17 |
| General Procedure for the Synthesis of <b>5</b> .....                               | S18 |
| Characterization Data of Products <b>5</b> .....                                    | S18 |
| Gram-Scale Experiments .....                                                        | S22 |
| Transformation of products .....                                                    | S22 |
| Characterization Data of Products <b>6</b> .....                                    | S23 |
| KIE Study .....                                                                     | S24 |
| References .....                                                                    | S25 |
| Copies of <sup>1</sup> H, <sup>13</sup> C NMR and <sup>19</sup> F NMR spectra ..... | S26 |

## General Information

Unless otherwise specified, the chemical reagents were purchased from commercial sources and used directly without purification. Analytical thin-layer chromatography (TLC): HSGF 254 (0.15-0.2 mm thickness). Detection was conducted under UV light at 254 nm. Preparative thin layer chromatography was HSGF 254 (0.4-0.5 mm thickness). Yields refer to isolated compounds.  $^1\text{H}$ ,  $^{13}\text{C}$ , and  $^{19}\text{F}$  NMR spectra were collected on Bruker 500 MHz and 600 MHz instrument in chloroform-*d* or DMSO-*d*<sub>6</sub>. Chemical shifts ( $\delta$ ) are expressed as parts per million (ppm). Proton coupling patterns were recorded as singlet (s), doublet (d), triplet (t), quartet (q), and multiple (m). HRMS (high-resolution mass spectrometry) were obtained by using a quadrupole mass analyzer with electrospray ionization (ESI) source.

## Preparation of Starting Materials

### General procedure A for preparation of 1b-1r<sup>[1-4]</sup>:

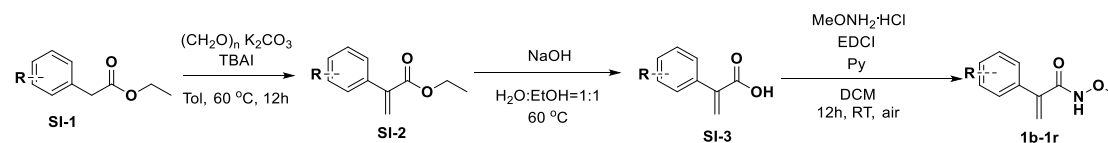

**Step 1:** Paraformaldehyde (0.90 g, 30.0 mmol, 3.0 equiv.), K<sub>2</sub>CO<sub>3</sub> (4.15 g, 30.0 mmol, 3.0 equiv.), *n*-Bu<sub>4</sub>NI (0.18 g, 0.5 mmol, 0.05 equiv.) were added to a solution of ester (10.0 mmol, 1.0 equiv.) in toluene (20.0 mL) at room temperature. The reaction mixture was heated to 60 °C for 12 h. After cooling to room temperature, H<sub>2</sub>O (10.0 mL) was added and the aqueous layer was extracted with diethyl ether (20.0 mL × 3). The combined organic layer was dried over MgSO<sub>4</sub>, concentrated in vacuo and purified by column chromatography to provide the corresponding acrylate **SI-2** as a colorless oil.

**Step 2:** A 50 mL round bottom flask was charged with ethyl 2-arylacrylate derivatives (1.0 equiv.), NaOH (5.0 equiv.), and H<sub>2</sub>O/EtOH (1:1, 0.5 M). The reaction was stirred at 60 °C for overnight and then the reaction was cooled down to room temperature and acidified with 2N HCl. The aqueous phase was extracted with ethyl acetate (50.0 mL × 3). The combined organic phase was dried over anhydrous Na<sub>2</sub>SO<sub>4</sub>, filtered, and evaporated under reduced pressure. The residue was purified by column chromatography on silica gel (DCM/MeOH = 20/1, v/v) to give the corresponding unsaturated acid.

**Step 3:** To a solution of acrylic acid **SI-3** (2.0 mmol) in DCM (20.0 mL) was added pyridine (7.0 equiv.), EDCI (2.0 equiv.) and  $\text{NH}_2\text{OCH}_3\cdot\text{HCl}$  (1.2 equiv.), and stirred at room temperature overnight. The mixture was washed with 2N HCl (20.0 mL), saturated aq.  $\text{NaHCO}_3$  (20.0 mL) and brine (20.0 mL), dried over  $\text{Na}_2\text{SO}_4$  and concentrated under reduced pressure to give the crude products, which was purified by column chromatography eluting with PE/EtOAc from 5:1 to 1:1.

**General procedure B for preparation of 1a, 1s, 1u<sup>[1,4]</sup>:**

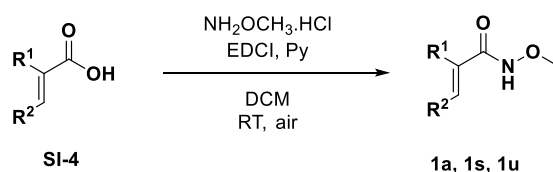

To a solution of acrylic acid **SI-4** (2.0 mmol) in DCM (20.0 mL) was added pyridine (7.0 equiv.), EDCI (2.0 equiv.) and  $\text{NH}_2\text{OCH}_3\cdot\text{HCl}$  (1.2 equiv.), and stirred at room temperature overnight. The mixture was washed with 2N HCl (20.0 mL), saturated aq.  $\text{NaHCO}_3$  (20.0 mL) and brine (20.0 mL), dried over  $\text{Na}_2\text{SO}_4$  and concentrated under reduced pressure to give the crude products, which was purified by column chromatography eluting with PE/EtOAc from 5:1 to 1:1.

**Preparation of 1t<sup>[4]</sup>:**

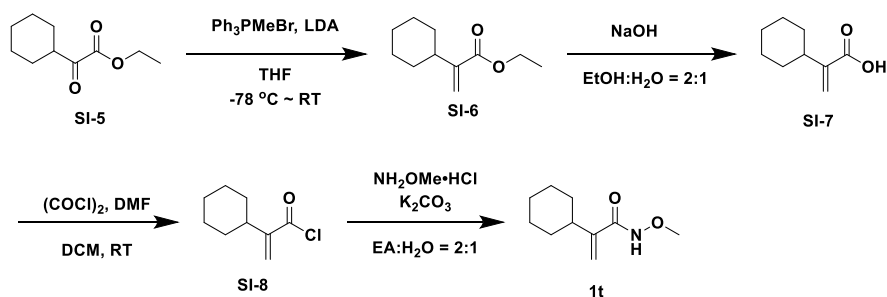

**Step 1:** An oven-dried 50 ml two-neck RBF was charged with methyl triphenyl phosphonium bromide (3.3 mmol) and dry THF (6.0 mL). The flask was cooled to  $-78\text{ }^\circ\text{C}$  and LDA (3.0 mmol, 2M in THF) was dropwise added to the solution under  $\text{N}_2$  atmosphere. After stirring 15 minutes, the mixture was warmed up to room temperature and stirred for 1 h, at which point the resulted yellow solution was re-cooled to  $-78\text{ }^\circ\text{C}$  followed with the addition of crude  $\alpha$ -ketoesters. After stirring for 1.0 h at  $-78\text{ }^\circ\text{C}$ , the mixture was warmed up to room temperature and the progress of the reaction was monitored using TLC. Once the reaction finished, 2N HCl (6.0 mL) was added followed by

extraction with ethyl acetate (2×10.0 ml), and dried over MgSO<sub>4</sub>. The organic solvent was evaporated and the residue was purified by column chromatography on silica gel to deliver the  $\alpha$ -substituted ethyl acrylate derivatives.

**Step 2:** A 50.0 mL round bottom flask was charged with ethyl 2-arylacrylate derivatives (1.0 equiv.), NaOH (5.0 equiv.), and H<sub>2</sub>O/EtOH (1:2, 0.5 M). The reaction was stirred at 60 °C for overnight and then the reaction was cooled down to room temperature and acidified with 2N HCl. The aqueous phase was extracted with ethyl acetate (50.0 mL x 3). The combined organic phase was dried over anhydrous Na<sub>2</sub>SO<sub>4</sub>, filtered, and evaporated under reduced pressure. The residue was purified by column chromatography on silica gel (DCM/MeOH = 20/1, v/v) to give the corresponding unsaturated acid.

**Step 3:** To a solution of acrylic acid **SI-7** (2.0 mmol) in DCM (20.0 mL) was added pyridine (7.1 equiv.), EDCI (2.0 equiv.) and NH<sub>2</sub>OCH<sub>3</sub>·HCl (1.2 equiv.), and stirred at room temperature overnight. The mixture was washed with 2N HCl (20.0 mL), saturated aq. NaHCO<sub>3</sub> (20.0 mL) and brine (20.0 mL), dried over Na<sub>2</sub>SO<sub>4</sub> and concentrated under reduced pressure to give the crude products, which was purified by column chromatography eluting with PE/EtOAc from 5:1 to 1:1.

#### Preparation of **1v**:

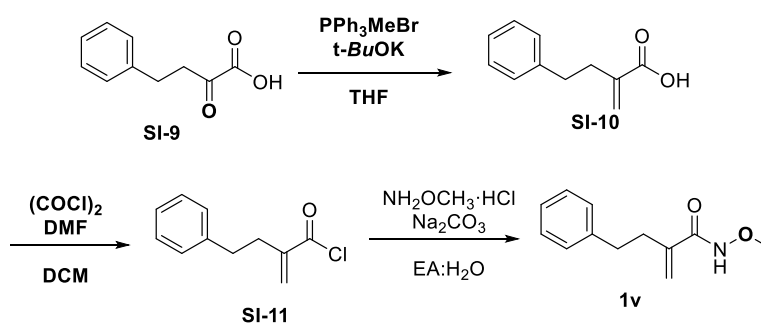

**Step 1:** Charge a flame-dried 100 mL round-bottom flask with methyltriphenylphosphonium bromide (3.0 g, 8.4 mmol, 5.0 equiv.) in dry THF (25 mL) at 0°C. Add t-BuOK (943mg, 8.4 mmol, 5.0 equiv.) to the mixture, then warm the sealed mixture to 22°C. Allow the mixture to stir at 22°C for 30 minutes. Add a solution of  $\alpha$ -oxobenzenebutanoic acid (300 mg, 1.69 mmol, 1.0 equiv.) in dry THF (6 mL) to the mixture. Allow the resultant mixture to stir at 22°C for 3 hours. Acidify the mixture with aqueous HCl (2.0 M) to pH = 3-4, then remove the excess of THF under vacuum. Extract the resultant aqueous solution with EtOAc (3 x 30 mL). Wash the combined organic phases

with brine (30.0 mL). Dry the combined organic phases over anhydrous  $\text{Na}_2\text{SO}_4$ . Filter the mixture and concentrate under vacuum to get **SI-9**.

**Step 2:** To a solution of crude intermediate **SI-9** in anhydrous DCM (8.0 mL) was added  $(\text{COCl})_2$  (3.0 equiv.) over 30.0 min at 0 °C, then 2 drops of DMF was added. The resulting mixture was stirred at room temperature for 2.0 h. Then, the solution was concentrated to afford crude acyl chloride **SI-10** for the next step without further purification.

**Step 3:** The crude acyl chloride **SI-10** in EtOAc (5.0 mL) was added to a solution of methoxyamine hydrochloride (2.0 equiv.) and  $\text{K}_2\text{CO}_3$  (2.0 equiv.) in EtOAc/ $\text{H}_2\text{O}$  = 2/1 (9.0 mL) over 5.0 min at 0°C. The solution was stirred at room temperature for 12.0 h. Then the solution was extracted with EtOAc (40.0 mL x 3). The combined organic layer was dried over anhydrous  $\text{Na}_2\text{SO}_4$ , and evaporated to afford the residue. The residue was subject to column chromatography on silica gel (DCM/MeOH = 20/1) to afford the corresponding **1v**.

#### Preparation of **1w**:

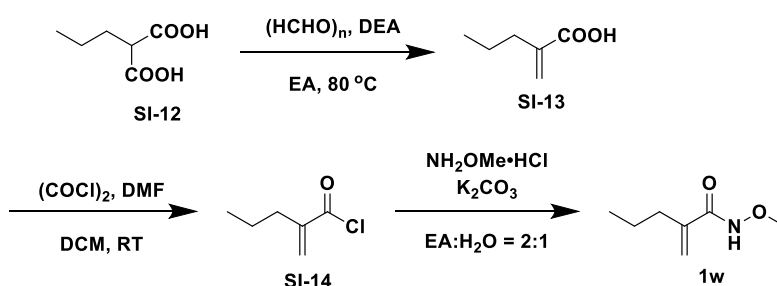

**Step 1:** To a solution of the diacid in EtOAc (0.75 M) at 0°C and subsequent addition of paraformaldehyde (1.5 equiv.). The reaction mixture was refluxed by oil bath for 2 h. After cooling to room temperature,  $\text{H}_2\text{O}$  (10.0 mL) was added and the aqueous layer was extracted with diethyl ether (20.0 mL x 3). The combined organic layer was dried over  $\text{MgSO}_4$ , concentrated in vacuo and purified the resulting crude acrylic acid **SI-13** as a colorless oil.

**Step 2:** To a solution of crude intermediate **SI-10** in anhydrous DCM (8.0 mL) was added  $(\text{COCl})_2$  (3.0 equiv.) over 30.0 min at 0 °C, then 2 drops of DMF was added. The resulting mixture was stirred at room temperature for 2.0 h. Then, the solution was concentrated to afford crude acyl chloride **SI-14** for the next step without further purification.

**Step 3:** The crude acyl chloride **SI-14** in EtOAc (5.0 mL) was added to a solution of methoxyamine hydrochloride (2.0 equiv.) and K<sub>2</sub>CO<sub>3</sub> (2.0 equiv.) in EtOAc/H<sub>2</sub>O = 2/1 (9.0 mL) over 5.0 min at 0°C. The solution was stirred at room temperature for 12.0 h. Then the solution was extracted with EtOAc (40.0 mL x 3). The combined organic layer was dried over anhydrous Na<sub>2</sub>SO<sub>4</sub>, and evaporated to afford the residue. The residue was subject to column chromatography on silica gel (DCM/MeOH = 20/1) to afford the corresponding **1w**.

### Characterization Data of Substrate **1t**, **1v**, **1w**

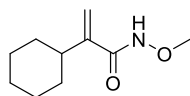

**2-cyclohexyl-N-methoxyacrylamide (1t):** <sup>1</sup>H NMR (500 MHz, Chloroform-*d*) δ 8.29 (s, 1H), 5.39 (s, 1H), 5.20 (d, *J* = 1.5 Hz, 1H), 3.81 (s, 3H), 2.47 – 2.40 (m, 1H), 1.84 – 1.73 (m, 4H), 1.73 – 1.66 (m, 1H), 1.36 – 1.25 (m, 2H), 1.20 – 1.08 (m, 3H).

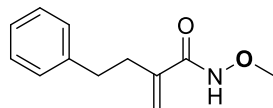

**N-methoxy-2-methylene-4-phenylbutanamide (1v):** <sup>1</sup>H NMR (600 MHz, Chloroform-*d*) δ 8.30 (s, 1H), 7.28 (m, 2H), 7.18 (m, 3H), 5.54 (s, 1H), 5.28 (s, 1H), 3.79 (s, 3H), 2.80 (t, *J* = 7.8 Hz, 2H), 2.63 (t, *J* = 7.8 Hz, 2H).

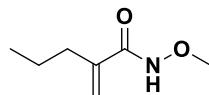

**N-methoxy-2-methylenepentanamide (1w):** <sup>1</sup>H NMR (600 MHz, Chloroform-*d*) δ 10.05 – 9.68 (m, 1H), 5.54 (s, 1H), 5.20 (s, 1H), 3.69 (s, 3H), 2.30 – 2.11 (m, 2H), 1.46 – 1.32 (m, *J* = 7.1, 6.0 Hz, 2H), 0.90 – 0.77 (m, 3H).

### General Procedure for the Synthesis of **3**.

Representative Procedure for the Synthesis of **3a**

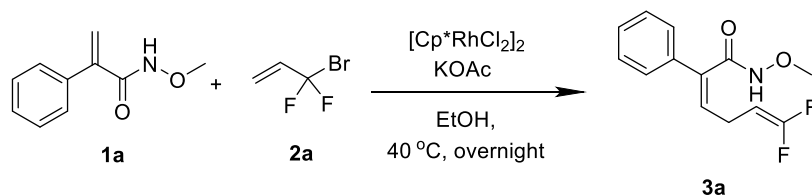

In a 10 mL reaction tube, to the mixture of **1a** (35.4 mg, 0.20 mmol, 1.0 eq), **2a** (47 mg, 0.3 mmol, 1.5 eq), [Cp<sup>\*</sup>RhCl<sub>2</sub>]<sub>2</sub> (3.7 mg, 3.0 mol%) and KOAc (29.4 mg, 0.3 mmol, 1.5 eq) was added EtOH

(2.0 mL). Then the resulting mixture was stirred at 40 °C for 12.0 h. When the reaction was finished, the products are purified by preparative thin layer chromatography (DCM/MeOH = 20/1). The product **3a** was obtained as a yellow oil (40 mg, 79% yield). Other products **3** were prepared by a similar procedure.

### Characterization Data of Products **3**

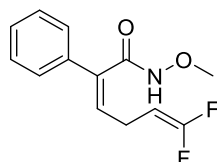

**(Z)-6,6-difluoro-N-methoxy-2-phenylhexa-2,5-dienamide (3a)**: column solvent: DCM/MeOH = 20/1, yellow oil (40 mg, yield 79%);  $^1\text{H NMR}$  (500 MHz,  $\text{DMSO-}d_6$ )  $\delta$  11.51 (s, 1H), 7.40 – 7.34 (m, 4H), 7.32 – 7.28 (m, 1H), 6.12 (t,  $J = 7.6$  Hz, 1H), 4.62 (dtd,  $J = 26.4, 7.8, 2.5$  Hz, 1H), 3.71 (s, 3H), 2.92 – 2.87 (m, 2H).  $^{13}\text{C NMR}$  (126 MHz,  $\text{DMSO-}d_6$ )  $\delta$  164.07, 155.43 (t,  $J = 284.3$  Hz), 136.14, 136.03, 128.64, 127.93, 127.90, 125.51, 76.94 (dd,  $J = 22.6, 18.8$  Hz), 63.22, 22.59 (d,  $J = 4.9$  Hz).  $^{19}\text{F NMR}$  (471 MHz,  $\text{Chloroform-}d$ )  $\delta$  -87.73 (d,  $J = 43.0$  Hz), -89.73 (d,  $J = 42.4$  Hz). **HRMS (ESI-MS)  $m/z$** :  $[\text{M}+\text{H}]^+$  Calcd for  $\text{C}_{13}\text{H}_{14}\text{F}_2\text{NO}_2$ : 254.0987; Found: 254.0988.

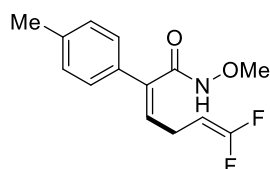

**(Z)-6,6-difluoro-N-methoxy-2-(p-tolyl)hexa-2,5-dienamide (3b)**: column solvent: DCM/MeOH = 20/1, yellow oil (47 mg, yield 77%);  $^1\text{H NMR}$  (500 MHz,  $\text{Chloroform-}d$ )  $\delta$  8.19 (s, 1H), 7.23 (d,  $J = 7.9$  Hz, 2H), 7.15 (d,  $J = 7.9$  Hz, 2H), 5.97 (t,  $J = 7.6$  Hz, 1H), 4.30 (dtd,  $J = 25.0, 7.8, 2.1$  Hz, 1H), 3.84 (s, 3H), 3.12 – 3.06 (m, 2H), 2.34 (s, 3H).  $^{13}\text{C NMR}$  (126 MHz,  $\text{Chloroform-}d$ )  $\delta$  166.26, 159.07, 156.79, 154.50, 138.56, 135.31, 133.61, 132.80, 129.65, 126.68, 76.51, 76.34 (d,  $J = 3.4$  Hz), 76.17, 64.73, 23.04, 23.00, 21.26.  $^{19}\text{F NMR}$  (471 MHz,  $\text{Chloroform-}d$ )  $\delta$  -87.85 (d,  $J = 44.8$  Hz), -89.83 (d,  $J = 44.5$  Hz). **HRMS (ESI-MS)  $m/z$** :  $[\text{M}+\text{H}]^+$  Calcd for  $\text{C}_{14}\text{H}_{16}\text{F}_2\text{NO}_2$ : 268.1144; Found: 268.1138.

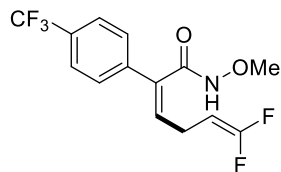

**(Z)-6,6-difluoro-N-methoxy-2-(4-(trifluoromethyl)phenyl)hexa-2,5-dienamide (3c):** column solvent: DCM/MeOH = 20/1, yellow oil (47 mg, yield 74%);  $^1\text{H NMR}$  (500 MHz, Chloroform-*d*)  $\delta$  8.23 (s, 1H), 7.60 (d,  $J = 8.2$  Hz, 2H), 7.48 (d,  $J = 8.0$  Hz, 2H), 6.11 (t,  $J = 7.7$  Hz, 1H), 4.31 (dtd,  $J = 24.9, 7.9, 2.0$  Hz, 1H), 3.86 (s, 3H), 3.14 – 3.03 (m, 2H).  $^{13}\text{C NMR}$  (151 MHz, Chloroform-*d*)  $\delta$  165.23, 158.67, 156.77, 154.86, 139.64, 134.51, 130.43 (d,  $J = 32.7$  Hz), 126.73, 125.78 (d,  $J = 3.8$  Hz), 124.81, 123.00, 75.84, 75.69 (d,  $J = 4.1$  Hz), 75.55, 64.61, 23.07 (d,  $J = 4.8$  Hz).  $^{19}\text{F NMR}$  (565 MHz, Chloroform-*d*)  $\delta$  -62.77, -87.18 (d,  $J = 44.7$  Hz), -89.26 (dd,  $J = 41.4, 24.0$  Hz). **HRMS (ESI-MS)  $m/z$ :**  $[\text{M}+\text{H}]^+$  Calcd for  $\text{C}_{14}\text{H}_{13}\text{F}_5\text{NO}_2$ : 322.0861; Found: 322.0853.

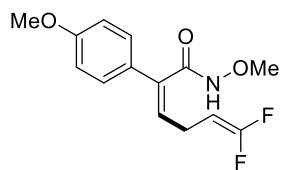

**(Z)-6,6-difluoro-N-methoxy-2-(4-methoxyphenyl)hexa-2,5-dienamide (3d):** column solvent: DCM/MeOH = 20/1, yellow oil (35 mg, yield 61%);  $^1\text{H NMR}$  (500 MHz, Chloroform-*d*)  $\delta$  8.16 (s, 1H), 7.27 (d,  $J = 11.4$  Hz, 2H), 6.92 – 6.81 (m, 2H), 5.92 (t,  $J = 7.7$  Hz, 1H), 4.30 (dtd,  $J = 25.0, 7.8, 2.1$  Hz, 1H), 3.85 (s, 3H), 3.81 (s, 3H), 3.11 – 3.05 (m, 2H).  $^{13}\text{C NMR}$  (126 MHz, Chloroform-*d*)  $\delta$  166.37, 159.92, 156.78 (t,  $J = 287.5$  Hz), 134.95, 131.71, 128.91, 128.02, 114.35, 76.41 (dd,  $J = 23.0, 20.0$  Hz), 64.75, 55.47, 23.01 (d,  $J = 5.2$  Hz).  $^{19}\text{F NMR}$  (471 MHz, Chloroform-*d*)  $\delta$  -87.90 (d,  $J = 43.6$  Hz), -89.89 (dd,  $J = 44.1, 24.9$  Hz). **HRMS (ESI-MS)  $m/z$ :**  $[\text{M}+\text{H}]^+$  Calcd for  $\text{C}_{14}\text{H}_{16}\text{F}_2\text{NO}_3$ : 284.1093; Found: 284.1086.

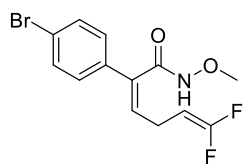

**(Z)-2-(4-bromophenyl)-6,6-difluoro-N-methoxyhexa-2,5-dienamide (3e):** column solvent: DCM/MeOH = 20:1, yellow oil (61 mg, yield 92%);  $^1\text{H NMR}$  (500 MHz, DMSO-*d*<sub>6</sub>)  $\delta$  11.54 (s,



1H), 7.59 – 7.54 (m, 2H), 7.35 – 7.30 (m, 2H), 6.18 (t,  $J = 7.5$  Hz, 1H), 4.61 (dtd,  $J = 26.4, 7.8, 2.5$  Hz, 1H), 3.70 (s, 3H), 2.90 – 2.84 (m, 2H).  $^{13}\text{C NMR}$  (151 MHz, Chloroform-*d*)  $\delta$  165.59, 156.84 (t,  $J = 287.7$  Hz), 135.25, 134.62, 133.47, 132.09, 128.21, 122.75, 76.14, 75.99 (dd,  $J = 23.6, 20.1$  Hz), 64.76, 23.13 (d,  $J = 4.9$  Hz).  $^{19}\text{F NMR}$  (471 MHz, Chloroform-*d*)  $\delta$  -87.33 (d,  $J = 42.8$  Hz), -89.37 (d,  $J = 43.0$  Hz). **HRMS (ESI-MS)  $m/z$ :**  $[\text{M}+\text{H}]^+$  Calcd for  $\text{C}_{13}\text{H}_{13}\text{BrF}_2\text{NO}_2$ : 332.0092, 334.0072; Found: 332.0088, 334.0063.

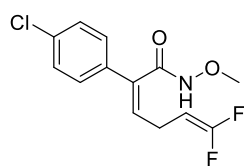

**(Z)-2-(4-chlorophenyl)-6,6-difluoro-N-methoxyhexa-2,5-dienamide (3f):** column solvent: DCM/MeOH = 20:1, yellow oil (46 mg, yield 80%);  $^1\text{H NMR}$  (500 MHz, Chloroform-*d*)  $\delta$  8.89 (s, 1H), 7.29 – 7.21 (m, 4H), 5.95 (t,  $J = 7.6$  Hz, 1H), 4.26 (dtd,  $J = 25.0, 7.8, 2.0$  Hz, 1H), 3.79 (s, 3H), 3.00 (t,  $J = 7.8$  Hz, 2H).  $^{13}\text{C NMR}$  (151 MHz, Chloroform-*d*)  $\delta$  165.64, 156.76 (t,  $J = 287.8$  Hz), 134.73, 134.55, 134.47, 132.87, 129.03, 127.78, 75.99 (dd,  $J = 23.7, 20.0$  Hz), 64.56, 23.07 (d,  $J = 4.5$  Hz).  $^{19}\text{F NMR}$  (471 MHz, Chloroform-*d*)  $\delta$  -87.49 (d,  $J = 42.8$  Hz), -89.56 (d,  $J = 44.0$  Hz). **HRMS (ESI-MS)  $m/z$ :**  $[\text{M}+\text{H}]^+$  Calcd for  $\text{C}_{13}\text{H}_{13}\text{ClF}_2\text{NO}_2$ : 288.0597; Found: 288.0591.

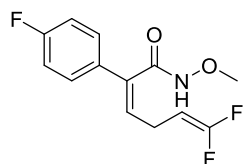

**(Z)-6,6-difluoro-2-(4-fluorophenyl)-N-methoxyhexa-2,5-dienamide (3g):** column solvent: DCM/MeOH = 20:1, yellow solid (29 mg, yield 54%);  $^1\text{H NMR}$  (500 MHz, Chloroform-*d*)  $\delta$  8.55 (s, 1H), 7.35 – 7.28 (m, 2H), 7.05 – 6.98 (m, 2H), 5.93 (t,  $J = 7.7$  Hz, 1H), 4.28 (dtd,  $J = 25.0, 7.9, 2.1$  Hz, 1H), 3.82 (s, 3H), 3.07 – 3.01 (m, 2H).  $^{13}\text{C NMR}$  (126 MHz, Chloroform-*d*)  $\delta$  165.86, 162.92 (d,  $J = 248.4$  Hz), 156.83 (t,  $J = 287.8$  Hz), 134.55, 133.06, 132.50 (d,  $J = 3.7$  Hz), 128.47 (d,  $J = 8.2$  Hz), 115.94 (d,  $J = 21.6$  Hz), 76.14 (dd,  $J = 23.8, 20.0$  Hz), 64.75, 23.07 (d,  $J = 5.0$  Hz).  $^{19}\text{F NMR}$  (471 MHz, Chloroform-*d*)  $\delta$  -87.56 (d,  $J = 44.8$  Hz), -89.59 (d,  $J = 44.7$  Hz), -113.06. **HRMS (ESI-MS)  $m/z$ :**  $[\text{M}+\text{H}]^+$  Calcd for  $\text{C}_{13}\text{H}_{13}\text{F}_3\text{NO}_2$ : 272.0893; Found: 272.0887.

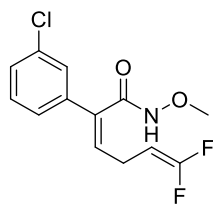

**(Z)-2-(3-chlorophenyl)-6,6-difluoro-N-methoxyhexa-2,5-dienamide (3h):** column solvent: DCM/MeOH = 20:1, yellow oil (18 mg, yield 31%); <sup>1</sup>H NMR (500 MHz, Chloroform-d) δ 8.43 (s, 1H), 7.32 – 7.27 (m, 4H), 5.99 (t, *J* = 7.7 Hz, 1H), 4.28 (dtd, *J* = 25.0, 7.8, 2.0 Hz, 1H), 3.83 (s, 3H), 3.09 – 3.03 (m, 2H). <sup>13</sup>C NMR (126 MHz, Chloroform-d) δ 165.43, 156.88 (t, *J* = 288.0 Hz), 138.13, 134.98, 134.43, 130.22, 130.09, 128.67, 126.81, 124.88, 75.98 (dd, *J* = 24.1, 19.7 Hz), 64.85, 23.13 (d, *J* = 4.8 Hz). <sup>19</sup>F NMR (471 MHz, Chloroform-d) δ -87.30 (d, *J* = 43.5 Hz), -89.33 (d, *J* = 42.6 Hz). HRMS (ESI-MS) *m/z*: [M+H]<sup>+</sup> Calcd for C<sub>13</sub>H<sub>13</sub>ClF<sub>2</sub>NO<sub>2</sub>: 288.0597; Found: 288.0593.

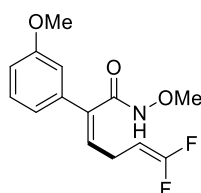

**(Z)-6,6-difluoro-N-methoxy-2-(3-methoxyphenyl)hexa-2,5-dienamide (3i):** column solvent: DCM/MeOH = 20/1, yellow oil (26 mg, yield 46%); <sup>1</sup>H NMR (500 MHz, Chloroform-d) δ 8.60 (s, 1H), 7.39 – 7.18 (m, 1H), 7.18 – 6.62 (m, 3H), 5.97 (t, *J* = 7.6 Hz, 1H), 4.28 (dtd, *J* = 25.0, 7.8, 2.1 Hz, 1H), 3.80 (s, 3H), 3.78 (s, 3H), 3.08 – 3.02 (m, 2H). <sup>13</sup>C NMR (126 MHz, Chloroform-d) δ 165.92, 159.96, 156.79 (t, *J* = 287.6 Hz), 137.86, 135.31, 133.78, 129.98, 119.21, 114.07, 112.36, 76.22 (dd, *J* = 23.5, 19.7 Hz), 64.63, 55.40, 23.03 (d, *J* = 4.9 Hz). <sup>19</sup>F NMR (471 MHz, Chloroform-d) δ -87.80 (d, *J* = 44.5 Hz), -89.82 (d, *J* = 44.6 Hz). HRMS (ESI-MS) *m/z*: [M+H]<sup>+</sup> Calcd for C<sub>14</sub>H<sub>16</sub>F<sub>2</sub>NO<sub>3</sub>: 284.1093; Found: 284.1086.

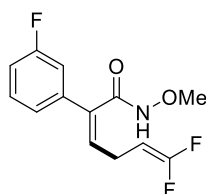

**(Z)-6,6-difluoro-2-(3-fluorophenyl)-N-methoxyhexa-2,5-dienamide (3j):** column solvent: DCM/MeOH = 20/1, yellow oil (35 mg, yield 65%); <sup>1</sup>H NMR (500 MHz, Chloroform-d) δ 8.28 (s, 1H), 7.32 – 7.28 (m, 2H), 7.16 – 7.13 (m, 1H), 7.10 – 7.02 (m, 1H), 6.04 (t, *J* = 7.6 Hz, 1H), 4.31

(dtd,  $J = 25.1, 7.9, 2.1$  Hz, 1H), 3.81 (s, 3H), 3.23 – 3.16 (m, 2H).  $^{13}\text{C NMR}$  (126 MHz, Chloroform-*d*)  $\delta$  165.52, 164.04, 162.08, 159.14, 156.85, 154.56, 138.45 (d,  $J = 7.9$  Hz), 134.63, 133.84, 130.51 (d,  $J = 8.5$  Hz), 122.31, 115.47 (d,  $J = 21.3$  Hz), 113.56 (d,  $J = 22.4$  Hz), 76.14, 75.96 (d,  $J = 4.3$  Hz), 75.79, 64.73, 23.09 (d,  $J = 5.0$  Hz).  $^{19}\text{F NMR}$  (471 MHz, Chloroform-*d*)  $\delta$  -87.40 (d,  $J = 44.2$  Hz), -89.44 (d,  $J = 43.7$  Hz), -112.19. **HRMS (ESI-MS)  $m/z$ :**  $[\text{M}+\text{H}]^+$  Calcd for  $\text{C}_{13}\text{H}_{13}\text{F}_3\text{NO}_2$ : 272.0893; Found: 272.0887.

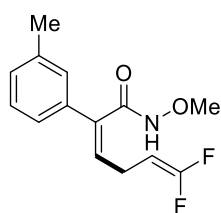

**(Z)-6,6-difluoro-N-methoxy-2-(m-tolyl)hexa-2,5-dienamide (3k):** column solvent: DCM/MeOH = 20/1, yellow oil (46 mg, yield 86%);  $^1\text{H NMR}$  (500 MHz, DMSO-*d*<sub>6</sub>)  $\delta$  11.47 (s, 1H), 7.28 – 7.11 (m, 4H), 6.09 (t,  $J = 7.6$  Hz, 1H), 4.61 (dtd,  $J = 26.4, 7.8, 2.5$  Hz, 1H), 3.70 (s, 3H), 2.89 – 2.85 (m, 2H), 2.30 (s, 3H).  $^{13}\text{C NMR}$  (151 MHz, Chloroform-*d*)  $\delta$  166.14, 156.76 (t,  $J = 287.6$  Hz), 138.64, 136.37, 135.53, 133.05, 129.26, 128.79, 127.38, 123.77, 76.28 (dd,  $J = 23.5, 20.0$  Hz), 64.61, 23.01 (d,  $J = 4.8$  Hz), 21.47.  $^{19}\text{F NMR}$  (471 MHz, DMSO-*d*<sub>6</sub>)  $\delta$  -89.02 (d,  $J = 45.5$  Hz), -90.81 (d,  $J = 46.3$  Hz). **HRMS (ESI-MS)  $m/z$ :**  $[\text{M}+\text{H}]^+$  Calcd for  $\text{C}_{14}\text{H}_{16}\text{F}_2\text{NO}_2$ : 268.1144; Found: 286.1137.

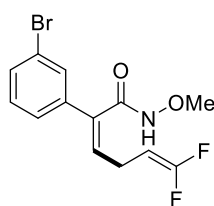

**(Z)-2-(3-bromophenyl)-6,6-difluoro-N-methoxyhexa-2,5-dienamide (3l):** column solvent: DCM/MeOH = 20/1, yellow oil (20 mg, yield 33%);  $^1\text{H NMR}$  (500 MHz, Chloroform-*d*)  $\delta$  8.36 (s, 1H), 7.50 (s, 1H), 7.44 (d,  $J = 7.9$  Hz, 1H), 7.30 – 7.27 (m, 1H), 7.21 (t,  $J = 7.9$  Hz, 1H), 6.02 (t,  $J = 7.7$  Hz, 1H), 4.29 (dtd,  $J = 25.0, 7.9, 2.0$  Hz, 1H), 3.84 (s, 3H), 3.10 – 3.04 (m, 2H).  $^{13}\text{C NMR}$  (151 MHz, Chloroform-*d*)  $\delta$  165.40, 156.89 (t,  $J = 287.9$  Hz), 138.41, 134.51, 134.36, 131.60, 130.47, 129.69, 125.35, 123.10, 75.97 (d,  $J = 24.4, 19.9$  Hz), 64.85, 23.13 (d,  $J = 4.9$  Hz).  $^{19}\text{F NMR}$  (471 MHz, Chloroform-*d*)  $\delta$  -87.28 (d,  $J = 42.6$  Hz), -89.31 (d,  $J = 42.6$  Hz). **HRMS (ESI-MS)  $m/z$ :**

[M+H]<sup>+</sup> Calcd for C<sub>13</sub>H<sub>13</sub>BrF<sub>2</sub>NO<sub>2</sub>: 332.0092, 334.0072; Found: 332.0088, 334.0062.

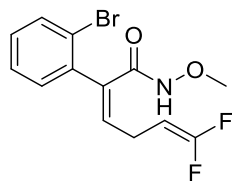

**(Z)-2-(2-bromophenyl)-6,6-difluoro-N-methoxyhexa-2,5-dienamide (3m):** column solvent: DCM/MeOH = 20:1, yellow oil (42 mg, yield 63%); <sup>1</sup>H NMR (500 MHz, Chloroform-d) δ 7.96 (s, 1H), 7.56 (d, *J* = 8.0 Hz, 1H), 7.37 – 7.24 (m, 2H), 7.21 – 7.16 (m, 1H), 5.86 (t, *J* = 7.4 Hz, 1H), 4.32 (dtd, *J* = 25.2, 7.9, 2.1 Hz, 1H), 3.74 (s, 3H), 3.37 – 3.31 (m, 2H). <sup>13</sup>C NMR (151 MHz, Chloroform-d) δ 164.10, 156.91 (t, *J* = 289.3 Hz), 142.42, 138.60, 133.82, 133.30, 131.73, 130.26, 128.13, 123.81, 76.23 (dd, *J* = 23.6, 20.0 Hz), 64.48, 22.71 (d, *J* = 4.7 Hz). <sup>19</sup>F NMR (471 MHz, DMSO-d<sub>6</sub>) δ -92.69 (d, *J* = 42.9 Hz), -94.52 (d, *J* = 42.5 Hz). HRMS (ESI-MS) *m/z*: [M+H]<sup>+</sup> Calcd for C<sub>13</sub>H<sub>13</sub>BrF<sub>2</sub>NO<sub>2</sub>: 332.0092, 334.0072; Found: 332.0088, 334.0063.

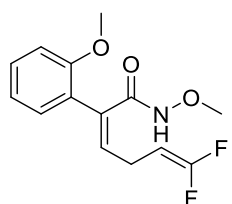

**(Z)-6,6-difluoro-N-methoxy-2-(2-methoxyphenyl)hexa-2,5-dienamide (3n):** column solvent: DCM/MeOH = 20:1, white solid (16 mg, yield 28%); <sup>1</sup>H NMR (500 MHz, Chloroform-d) δ 8.14 (s, 1H), 7.36 – 7.29 (m, 1H), 7.21 (dd, *J* = 7.5, 1.8 Hz, 1H), 7.00 – 6.91 (m, 1H), 6.91 – 6.86 (m, 2H), 5.89 (t, *J* = 7.5 Hz, 1H), 4.33 (dtd, *J* = 25.2, 7.9, 2.2 Hz, 1H), 3.83 (s, 3H), 3.77 (s, 3H), 3.23 (t, *J* = 7.7 Hz, 2H). <sup>13</sup>C NMR (151 MHz, CDCl<sub>3</sub>) δ 166.43, 158.70, 156.80, 156.70, 154.91, 138.28, 132.77, 130.85, 130.27, 127.12, 121.37, 111.08, 76.59 (dd, *J* = 23.1, 20.1 Hz), 64.44, 55.70, 22.78 (d, *J* = 5.1 Hz). <sup>19</sup>F NMR (471 MHz, Chloroform-d) δ -88.24 (d, *J* = 43.0 Hz), -90.10 (d, *J* = 43.9 Hz). HRMS (ESI-MS) *m/z*: [M+H]<sup>+</sup> Calcd for C<sub>14</sub>H<sub>16</sub>F<sub>2</sub>NO<sub>3</sub>: 284.1093; Found: 284.1087.

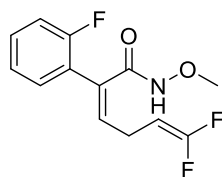

**(Z)-6,6-difluoro-2-(2-fluorophenyl)-N-methoxyhexa-2,5-dienamide (3o):** column solvent: DCM/MeOH = 20:1, yellow oil (20 mg, yield 37%); <sup>1</sup>H NMR (500 MHz, Chloroform-d) δ 8.09 (s, 1H), 7.36 – 7.27 (m, 2H), 7.15 (t, *J* = 7.5 Hz, 1H), 7.12 – 7.03 (m, 1H), 6.05 (t, *J* = 7.6 Hz, 1H), 4.33 (dtd, *J* = 25.0, 7.8, 2.0 Hz, 1H), 3.82 (s, 3H), 3.24 – 3.20 (m, 2H). <sup>13</sup>C NMR (151 MHz, Chloroform-d) δ 165.19, 159.89 (d, *J* = 248.4 Hz), 156.88 (t, *J* = 287.7 Hz), 139.05, 130.55, 129.78, 125.09 (d, *J* = 13.9 Hz), 124.78, 116.19 (d, *J* = 21.7 Hz), 76.15 (dd, *J* = 23.8, 20.1 Hz), 64.56, 23.08 (d, *J* = 3.1 Hz). <sup>19</sup>F NMR (471 MHz, Chloroform-d) δ -87.70 (d, *J* = 43.6 Hz), -89.62 (d, *J* = 44.3 Hz), -113.65. HRMS (ESI-MS) *m/z*: [M+H]<sup>+</sup> Calcd for C<sub>13</sub>H<sub>12</sub>F<sub>3</sub>NO<sub>2</sub>: 272.0893; Found: 272.0886.

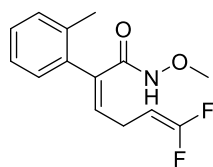

**(Z)-6,6-difluoro-N-methoxy-2-(o-tolyl)hexa-2,5-dienamide (3p):** column solvent: DCM/MeOH = 20:1, yellow oil (17 mg, yield 32%); <sup>1</sup>H NMR (500 MHz, Chloroform-d) δ 7.88 (s, 1H), 7.31 – 7.23 (m, 1H), 7.23 – 7.19 (m, 2H), 7.16 – 7.09 (m, 1H), 5.84 (t, *J* = 7.4 Hz, 1H), 4.34 (dtd, *J* = 25.3, 7.9, 2.2 Hz, 1H), 3.74 (s, 3H), 3.43 – 3.37 (m, 2H), 2.26 (s, 3H). <sup>13</sup>C NMR (126 MHz, Chloroform-d) δ 165.15, 156.91 (t, *J* = 288.2 Hz), 141.74, 137.41, 136.87, 133.63, 130.71, 130.11, 128.88, 126.57, 76.56 (dd, *J* = 23.7, 20.0 Hz), 64.54, 22.62 (d, *J* = 5.1 Hz), 19.83. <sup>19</sup>F NMR (471 MHz, Chloroform-d) δ -88.26 (d, *J* = 44.8 Hz), -90.09 (d, *J* = 44.3 Hz). HRMS (ESI-MS) *m/z*: [M+H]<sup>+</sup> Calcd for C<sub>14</sub>H<sub>16</sub>F<sub>2</sub>NO<sub>2</sub>: 268.1144; Found: 268.1139.

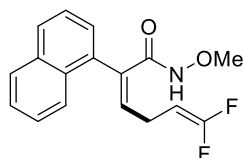

**(Z)-6,6-difluoro-N-methoxy-2-(naphthalen-1-yl)hexa-2,5-dienamide (3q):** column solvent: DCM/MeOH = 20/1, yellow oil (52 mg, yield 86%); <sup>1</sup>H NMR (500 MHz, Chloroform-d) δ 7.90 – 7.84 (m, 4H), 7.55 – 7.49 (m, 2H), 7.48 – 7.44 (m, 1H), 7.37 (d, *J* = 6.8 Hz, 1H), 6.04 (t, *J* = 7.4 Hz,

1H), 4.41 (dtd,  $J = 25.2, 7.9, 2.2$  Hz, 1H), 3.63 (s, 3H), 3.52 – 3.46 (m, 2H).  $^{13}\text{C NMR}$  (126 MHz, Chloroform-*d*)  $\delta$  165.37, 156.96 (t,  $J = 286.5$  Hz), 143.03, 135.36, 133.80, 132.74, 131.80, 129.37, 128.64, 127.83, 127.18, 126.65, 125.67, 125.13, 76.55 (dd,  $J = 23.7, 20.1$  Hz), 64.45, 22.89 (d,  $J = 5.0$  Hz).  $^{19}\text{F NMR}$  (471 MHz, Chloroform-*d*)  $\delta$  -88.10 (d,  $J = 44.9$  Hz), -89.94 (d,  $J = 45.1$  Hz). **HRMS (ESI-MS)  $m/z$ :**  $[\text{M}+\text{H}]^+$  Calcd for  $\text{C}_{17}\text{H}_{16}\text{F}_2\text{NO}_2$ : 304.1144; Found: 304.1138.

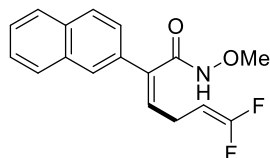

**(Z)-6,6-difluoro-N-methoxy-2-(naphthalen-2-yl)hexa-2,5-dienamide (3r):** column solvent: DCM/MeOH = 20/1, yellow oil (34 mg, yield 56%);  $^1\text{H NMR}$  (500 MHz, Chloroform-*d*)  $\delta$  8.36 (s, 1H), 7.95 – 7.70 (m, 4H), 7.62 – 7.42 (m, 3H), 6.13 (t,  $J = 7.6$  Hz, 1H), 4.33 (dtd,  $J = 25.0, 7.9, 2.0$  Hz, 1H), 3.86 (s, 3H), 3.16 – 3.11 (m, 2H).  $^{13}\text{C NMR}$  (126 MHz, Chloroform-*d*)  $\delta$  166.14, 156.84 (t,  $J = 288.9$  Hz), 135.51, 133.61, 133.42, 133.14, 128.73, 128.34, 127.77, 126.77 (d,  $J = 9.4$  Hz), 126.14, 124.08, 76.25 (dd,  $J = 23.8, 20.1$  Hz), 64.79, 23.18 (d,  $J = 5.3$  Hz).  $^{19}\text{F NMR}$  (471 MHz, Chloroform-*d*)  $\delta$  -87.62 (d,  $J = 43.2$  Hz), -89.62 (d,  $J = 44.5$  Hz). **HRMS (ESI-MS)  $m/z$ :**  $[\text{M}+\text{H}]^+$  Calcd for  $\text{C}_{17}\text{H}_{16}\text{F}_2\text{NO}_2$ : 304.1144; Found: 304.1145.

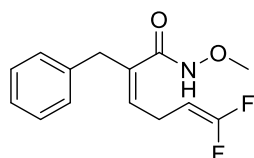

**(Z)-2-benzyl-6,6-difluoro-N-methoxyhexa-2,5-dienamide (3s):** column solvent: DCM/MeOH = 20:1, yellow solid (38 mg, yield 71%);  $^1\text{H NMR}$  (500 MHz, DMSO-*d*<sub>6</sub>)  $\delta$  11.12 (s, 1H), 7.28 (t,  $J = 7.5$  Hz, 2H), 7.23 – 7.14 (m, 2H), 5.47 (t,  $J = 7.4$  Hz, 1H), 4.55 (dtd,  $J = 26.7, 7.9, 2.6$  Hz, 1H), 3.50 (s, 3H), 3.47 (s, 2H), 2.83 – 2.77 (m, 2H).  $^{13}\text{C NMR}$  (151 MHz, Chloroform-*d*)  $\delta$  166.74, 158.90, 156.62, 154.33, 137.85, 134.64, 132.09, 128.94, 127.06, 76.39 (dd,  $J = 23.7, 20.0$  Hz), 64.44, 40.87, 22.76 (d,  $J = 4.9$  Hz).  $^{19}\text{F NMR}$  (471 MHz, DMSO-*d*<sub>6</sub>)  $\delta$  -89.33 (d,  $J = 45.3$  Hz), -91.22 (d,  $J = 48.2$  Hz). **HRMS (ESI-MS)  $m/z$ :**  $[\text{M}+\text{H}]^+$  Calcd for  $\text{C}_{14}\text{H}_{16}\text{F}_2\text{NO}_2$ : 268.1144; Found: 268.1141.

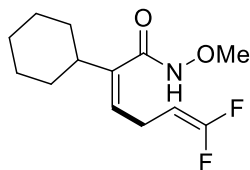

**(Z)-2-cyclohexyl-6,6-difluoro-N-methoxyhexa-2,5-dienamide (3t):** column solvent: DCM/MeOH = 20/1, yellow oil (16 mg, yield 31%);  $^1\text{H NMR}$  (500 MHz, Chloroform-*d*)  $\delta$  8.19 (s, 1H), 5.38 (t,  $J = 7.6$  Hz, 1H), 4.18 (dtd,  $J = 25.1, 7.8, 2.1$  Hz, 1H), 3.83 (s, 3H), 2.79 (t,  $J = 7.8$  Hz, 2H), 2.17 (t,  $J = 11.7$  Hz, 1H), 1.84 – 1.62 (m, 6H), 1.31 – 1.21 (m, 2H), 1.20 – 1.08 (m, 2H).  $^{13}\text{C NMR}$  (151 MHz, Chloroform-*d*)  $\delta$  167.72, 156.54 (t,  $J = 287.3$  Hz), 141.34, 126.63, 76.63 (m), 64.74, 41.96, 31.94, 26.43, 26.05, 22.68 (d,  $J = 4.9$  Hz).  $^{19}\text{F NMR}$  (471 MHz, Chloroform-*d*)  $\delta$  -88.09 (d,  $J = 45.2$  Hz), -90.03 (d,  $J = 45.0$  Hz). **HRMS (ESI-MS)  $m/z$ :**  $[\text{M}+\text{H}]^+$  Calcd for  $\text{C}_{13}\text{H}_{20}\text{F}_2\text{NO}_2$ : 260.1457; Found: 260.1455.

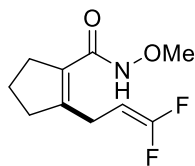

**2-(3,3-difluoroallyl)-N-methoxycyclopent-1-ene-1-carboxamide (3u):** column solvent: DCM/MeOH = 20/1, yellow oil (19 mg, yield 44%);  $^1\text{H NMR}$  (500 MHz, Chloroform-*d*)  $\delta$  8.29 (s, 1H), 4.26 (dtd,  $J = 25.1, 8.1, 2.3$  Hz, 1H), 3.79 (s, 3H), 3.26 (d,  $J = 8.1$  Hz, 2H), 2.51 (t,  $J = 7.4$  Hz, 2H), 2.44 (t,  $J = 7.6$  Hz, 2H), 1.91 – 1.84 (m, 2H).  $^{13}\text{C NMR}$  (151 MHz, Chloroform-*d*)  $\delta$  165.27, 156.97 (t,  $J = 285.9$  Hz), 129.18, 128.37, 75.74 (dd,  $J = 23.7, 20.6$  Hz), 64.75, 37.22, 33.20, 22.92 (d,  $J = 4.7$  Hz), 21.81.  $^{19}\text{F NMR}$  (565 MHz, Chloroform-*d*)  $\delta$  -88.44 (d,  $J = 46.1$  Hz), -90.88 (dd,  $J = 45.2, 27.1$  Hz). **HRMS (ESI-MS)  $m/z$ :**  $[\text{M}+\text{H}]^+$  Calcd for  $\text{C}_{10}\text{H}_{14}\text{F}_2\text{NO}_2$ : 230.0987; Found: 230.0988.

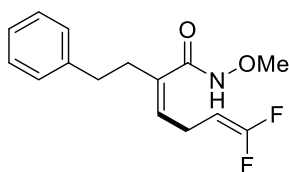

**(Z)-6,6-difluoro-N-methoxy-2-phenethylhexa-2,5-dienamide (3v):** column solvent: DCM/MeOH = 20/1, yellow soild (34 mg, yield 61%);  $^1\text{H NMR}$  (600 MHz, Chloroform-*d*)  $\delta$  8.05

(s, 1H), 7.28 (t,  $J = 7.6$  Hz, 2H), 7.20 (t,  $J = 7.4$  Hz, 1H), 7.16 (d,  $J = 7.4$  Hz, 2H), 5.46 (t,  $J = 7.7$  Hz, 1H), 4.14 (dtd,  $J = 25.1, 7.8, 2.1$  Hz, 1H), 3.79 (s, 3H), 2.82 (t,  $J = 7.8$  Hz, 2H), 2.80 – 2.71 (m, 2H), 2.53 (t,  $J = 7.8$  Hz, 2H).  $^{13}\text{C NMR}$  (151 MHz, Chloroform-*d*)  $\delta$  167.28, 158.47, 156.57, 154.66, 140.83, 134.61, 131.05, 128.63 (d,  $J = 4.9$  Hz), 126.37, 76.51, 76.37 (d,  $J = 3.2$  Hz), 76.22, 64.71, 36.14, 34.68, 22.70 (d,  $J = 5.2$  Hz).  $^{19}\text{F NMR}$  (565 MHz, Chloroform-*d*)  $\delta$  -88.00 (d,  $J = 44.9$  Hz), -89.84 (dd,  $J = 45.1, 24.9$  Hz). HRMS (ESI-MS)  $m/z$ :  $[\text{M}+\text{H}]^+$  Calcd for  $\text{C}_{15}\text{H}_{18}\text{F}_2\text{NO}_2$ : 282.1300; Found: 282.1301.

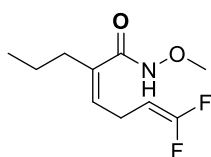

(*Z*)-6,6-difluoro-*N*-methoxy-2-propylhexa-2,5-dienamide (3w): column solvent: DCM/MeOH = 20/1, yellow oil (26 mg, yield 59%);  $^1\text{H NMR}$  (600 MHz, Chloroform-*d*)  $\delta$  8.51 (s, 1H), 5.46 (t,  $J = 7.6$  Hz, 1H), 4.19 (dtd,  $J = 25.2, 7.8, 2.1$  Hz, 1H), 3.81 (s, 3H), 2.84 (t,  $J = 7.5$  Hz, 2H), 2.17 (t,  $J = 7.6$  Hz, 2H), 1.53 – 1.36 (m, 2H), 0.90 (t,  $J = 7.4$  Hz, 3H).  $^{13}\text{C NMR}$  (151 MHz, Chloroform-*d*)  $\delta$  167.49, 158.46, 156.56, 154.65, 135.49, 130.03, 76.72, 76.57, 76.43, 64.64, 50.89, 36.70, 22.65 (d,  $J = 4.7$  Hz), 21.36, 13.67.  $^{19}\text{F NMR}$  (565 MHz, Chloroform-*d*)  $\delta$  -88.23 (d,  $J = 45.0$  Hz), -90.16 (dd,  $J = 45.4, 25.2$  Hz). HRMS (ESI-MS)  $m/z$ :  $[\text{M}+\text{H}]^+$  Calcd for  $\text{C}_{10}\text{H}_{16}\text{F}_2\text{NO}_2$ : 220.1143; Found: 220.1145.

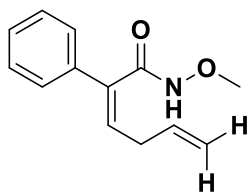

(*Z*)-*N*-methoxy-2-phenylhexa-2,5-dienamide (3x): column solvent: DCM/MeOH = 20/1, yellow soild (18 mg, yield 42%);  $^1\text{H NMR}$  (600 MHz, Chloroform-*d*)  $\delta$  8.41 (d,  $J = 21.9$  Hz, 1H), 7.37 (d,  $J = 7.6$  Hz, 2H), 7.35 – 7.27 (m, 3H), 6.13 (t,  $J = 7.6$  Hz, 1H), 5.96 – 5.84 (m, 1H), 5.16 – 5.05 (m, 2H), 3.83 (s, 3H), 3.13 (t,  $J = 7.1$  Hz, 2H).  $^{13}\text{C NMR}$  (151 MHz, Chloroform-*d*)  $\delta$  166.39, 136.61, 135.73, 132.96, 128.86, 128.32, 126.51, 126.14, 116.33, 64.69, 34.05. HRMS (ESI-MS)  $m/z$ :  $[\text{M}+\text{H}]^+$  Calcd for  $\text{C}_{13}\text{H}_{16}\text{NO}_2$ : 218.1176; Found: 218.1178.



### General procedure for the preparation of **4**<sup>[5-6]</sup>:

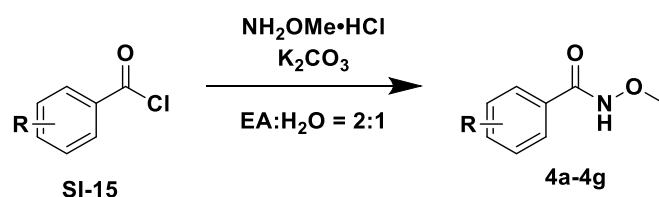

The crude **SI-15** in EtOAc (5.0 mL) was added to a solution of methoxyamine hydrochloride (2.0 equiv.) and K<sub>2</sub>CO<sub>3</sub>, (2.0 equiv.) in EtOAc/H<sub>2</sub>O = 2/1 (9.0 mL) over 5.0 min at 0°C. The solution was stirred at room temperature for 1.0 h. Then the solution was extracted with EtOAc (40.0 mL x 3). The combined organic layer was dried over anhydrous Na<sub>2</sub>SO<sub>4</sub>, and evaporated to afford the residue. The residue was subject to column chromatography on silica gel (DCM/MeOH = 20/1) to afford the corresponding **4a-4g**.

**Table S1.** Optimization of reaction conditions

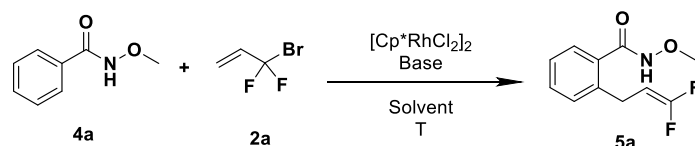

| Entry | Catalyst                                 | Base                           | Solvent    | T(°C)     | Time (h)  | Yield      |
|-------|------------------------------------------|--------------------------------|------------|-----------|-----------|------------|
| 1     | [Cp*RhCl <sub>2</sub> ] <sub>2</sub>     | KOAc                           | EtOH       | 40        | 12        | 44%        |
| 2     | [Cp*RhCl <sub>2</sub> ] <sub>2</sub>     | KOAc                           | DCE        | 40        | 12        | 53%        |
| 3     | [Cp*RhCl <sub>2</sub> ] <sub>2</sub>     | KOAc                           | Dioxane    | 40        | 12        | NR         |
| 4     | [Cp*RhCl <sub>2</sub> ] <sub>2</sub>     | KOAc                           | TFE        | 40        | 12        | NR         |
| 5     | [Cp*RhCl <sub>2</sub> ] <sub>2</sub>     | KOAc                           | DCE        | 60        | 12        | trace      |
| 6     | [Cp*RhCl <sub>2</sub> ] <sub>2</sub>     | NaOAc                          | DCE        | 40        | 12        | NR         |
| 7     | <b>[Cp*RhCl<sub>2</sub>]<sub>2</sub></b> | <b>CsOAc</b>                   | <b>DCE</b> | <b>40</b> | <b>12</b> | <b>57%</b> |
| 8     | [Cp*RhCl <sub>2</sub> ] <sub>2</sub>     | K <sub>2</sub> CO <sub>3</sub> | DCE        | 40        | 12        | NR         |

Reaction conditions: **4a** (0.2 mmol), **2a** (0.3 mmol), catalyst (3 mol%), base (0.2 mmol), under air, solvent (2.0 mL), 12 h. Isolated yields were reported. NR = no reaction.

## General Procedure for the Synthesis of 5:

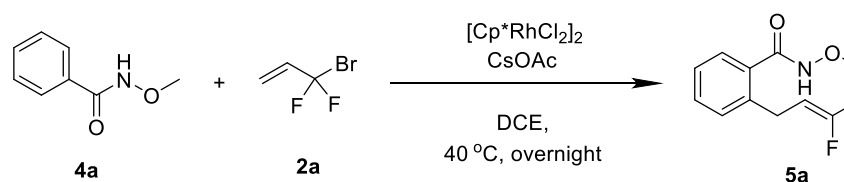

In a 10 mL reaction tube, to the mixture of **4a** (30.0 mg, 0.20 mmol, 1.0 eq), **2a** (47 mg, 0.3 mmol, 1.5 eq),  $[\text{Cp}^*\text{RhCl}_2]_2$  (3.8 mg, 3.0 mol%) and CsOAc (38 mg, 0.1 mmol, 1 eq) was added DCE (2.0 mL). Then the resulting mixture was stirred at 40 °C for 12.0 h. When the reaction was finished, the products are purified by preparative thin layer chromatography (DCM/MeOH = 20/1). The product **5a** was obtained as a yellow solid (26 mg, 57% yield). Other products **5** were prepared by a similar procedure.

## Characterization Data of Products 5

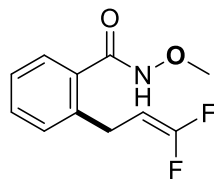

**2-(3,3-difluoroallyl)-N-methoxybenzamide (5a)**: column solvent: DCM/MeOH = 20/1, yellow solid (26 mg, yield 57%);  $^1\text{H NMR}$  (500 MHz, Chloroform-*d*)  $\delta$  8.54 (s, 1H), 7.44 – 7.37 (m, 1H), 7.33 (d,  $J$  = 6.8 Hz, 1H), 7.29 (d,  $J$  = 7.7 Hz, 1H), 7.24 (d,  $J$  = 7.4 Hz, 1H), 4.45 (dtd,  $J$  = 25.0, 8.0, 2.2 Hz, 1H), 3.88 (s, 3H), 3.48 (d,  $J$  = 8.0 Hz, 2H).  $^{13}\text{C NMR}$  (151 MHz, Chloroform-*d*)  $\delta$  167.67, 158.56, 156.66, 154.75, 139.01, 132.27, 131.28, 130.23, 127.40, 126.73, 77.89, 77.74 (d,  $J$  = 4.3 Hz), 77.60, 64.80, 26.15, 26.12.  $^{19}\text{F NMR}$  (471 MHz, Chloroform-*d*)  $\delta$  -88.42 (d,  $J$  = 44.9 Hz), -90.81 (d,  $J$  = 43.4 Hz). **HRMS (ESI-MS)  $m/z$** :  $[\text{M}+\text{H}]^+$  Calcd for  $\text{C}_{11}\text{H}_{12}\text{F}_2\text{NO}_2$ : 228.0831; Found: 228.0833.

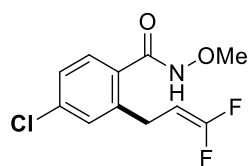

**4-chloro-2-(3,3-difluoroallyl)-N-methoxybenzamide (5b)**: column solvent: DCM/MeOH = 20/1, white solid (15 mg, yield 29%);  $^1\text{H NMR}$  (600 MHz, Chloroform-*d*)  $\delta$  8.55 (s, 1H), 7.28 (t,  $J$  = 4.2

Hz, 2H), 7.23 (d,  $J = 7.9$  Hz, 1H), 4.43 (dtd,  $J = 24.7, 8.0, 2.0$  Hz, 1H), 3.87 (s, 3H), 3.46 (d,  $J = 8.0$  Hz, 2H).  $^{13}\text{C NMR}$  (151 MHz, Chloroform-*d*)  $\delta$  166.78, 158.74, 156.84, 154.93, 141.13, 137.29, 130.61, 130.30, 128.76, 126.90, 77.08, 77.05, 64.84, 25.99 (d,  $J = 5.0$  Hz).  $^{19}\text{F NMR}$  (565 MHz, Chloroform-*d*)  $\delta$  -87.46 (d,  $J = 44.8$  Hz), -89.97 (dd,  $J = 42.3, 24.8$  Hz). **HRMS (ESI-MS)  $m/z$ :**  $[\text{M}+\text{H}]^+$  Calcd for  $\text{C}_{11}\text{H}_{11}\text{ClF}_2\text{NO}_2$ : 262.0441, 264.0411; Found: 262.0444, 264.0411.

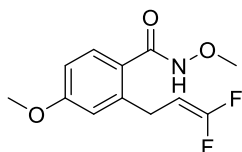

**2-(3,3-difluoroallyl)-N,4-dimethoxybenzamide (5c):** column solvent: DCM/MeOH = 20/1, yellow solid (12 mg, yield 23%);  $^1\text{H NMR}$  (600 MHz, Chloroform-*d*)  $\delta$  8.45 (s, 1H), 7.31 (d,  $J = 8.4$  Hz, 1H), 6.80 (s, 1H), 6.73 (dd,  $J = 8.5, 2.6$  Hz, 1H), 4.46 (dtd,  $J = 25.1, 8.0, 1.9$  Hz, 1H), 3.86 (s, 3H), 3.82 (s, 3H), 3.48 (d,  $J = 5.8$  Hz, 2H).  $^{13}\text{C NMR}$  (151 MHz, Chloroform-*d*)  $\delta$  161.77, 158.62, 156.71, 154.81, 141.57, 129.19, 124.40, 116.15, 111.43, 77.84, 77.70 (d,  $J = 4.5$  Hz), 77.55, 64.75, 55.49, 26.42 (d,  $J = 5.4$  Hz).  $^{19}\text{F NMR}$  (565 MHz, Chloroform-*d*)  $\delta$  -88.35 (d,  $J = 42.1$  Hz), -90.81 (dd,  $J = 44.7, 24.5$  Hz). **HRMS (ESI-MS)  $m/z$ :**  $[\text{M}+\text{H}]^+$  Calcd for  $\text{C}_{12}\text{H}_{14}\text{F}_2\text{NO}_3$ : 258.0936; Found: 258.0939.

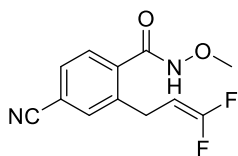

**4-cyano-2-(3,3-difluoroallyl)-N-methoxybenzamide (5d):** column solvent: DCM/MeOH = 20/1, yellow solid (14 mg, yield 28%);  $^1\text{H NMR}$  (500 MHz, Chloroform-*d*)  $\delta$  8.86 (s, 1H), 7.55 (d,  $J = 16.3$  Hz, 2H), 7.45 (d,  $J = 7.9$  Hz, 1H), 4.42 (dtd,  $J = 24.6, 8.0, 1.9$  Hz, 1H), 3.88 (s, 3H), 3.49 (d,  $J = 7.9$  Hz, 2H).  $^{13}\text{C NMR}$  (126 MHz, Chloroform-*d*)  $\delta$  165.75, 159.29, 156.99, 154.69, 140.50, 136.54, 133.46, 130.45, 128.22, 117.84, 114.98, 76.68, 76.51 (d,  $J = 5.6$  Hz), 76.33, 64.90, 25.88 (d,  $J = 5.5$  Hz).  $^{19}\text{F NMR}$  (565 MHz, Chloroform-*d*)  $\delta$  -86.56 (d,  $J = 40.7$  Hz), -89.12 (dd,  $J = 40.6, 24.4$  Hz). **HRMS (ESI-MS)  $m/z$ :**  $[\text{M}+\text{H}]^+$  Calcd for  $\text{C}_{12}\text{H}_{11}\text{F}_2\text{N}_2\text{O}_2$ : 253.0783; Found: 253.0786.

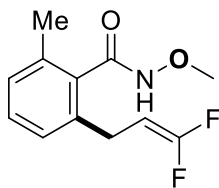

**2-(3,3-difluoroallyl)-N-methoxy-6-methylbenzamide (5e):** column solvent: DCM/MeOH = 20/1, white solid (35 mg, yield 73%);  $^1\text{H NMR}$  (600 MHz, Chloroform-*d*)  $\delta$  8.54 (s, 1H), 7.24 (t,  $J$  = 7.6 Hz, 1H), 7.06 (d,  $J$  = 7.7 Hz, 2H), 4.38 (dtd,  $J$  = 24.8, 8.0, 2.1 Hz, 1H), 3.89 (s, 3H), 3.31 (d,  $J$  = 8.0 Hz, 2H), 2.32 (s, 3H).  $^{13}\text{C NMR}$  (151 MHz, Chloroform-*d*)  $\delta$  167.22, 158.46, 156.56, 154.65, 137.23 (t,  $J$  = 2.4 Hz), 135.73, 133.04, 130.14, 128.62, 126.45, 77.75, 77.60 (d,  $J$  = 4.1 Hz), 77.46, 64.65, 25.92 (d,  $J$  = 4.8 Hz), 19.15.  $^{19}\text{F NMR}$  (565 MHz, Chloroform-*d*)  $\delta$  -88.19 (d,  $J$  = 43.6 Hz), -90.75 (dd,  $J$  = 43.8, 24.6 Hz). **HRMS (ESI-MS)  $m/z$ :** [M+H] $^+$  Calcd for C<sub>12</sub>H<sub>14</sub>F<sub>2</sub>NO<sub>2</sub>: 242.0987; Found: 242.0988.

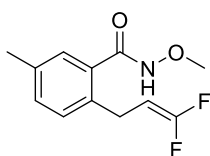

**2-(3,3-difluoroallyl)-N-methoxy-5-methylbenzamide (5f):** column solvent: DCM/MeOH = 20/1, white solid (34 mg, yield 70%);  $^1\text{H NMR}$  (600 MHz, Chloroform-*d*)  $\delta$  8.43 (s, 1H), 7.21 (d,  $J$  = 6.2 Hz, 1H), 7.17 (d,  $J$  = 7.9 Hz, 1H), 7.15 (s, 1H), 4.43 (dtd,  $J$  = 25.2, 8.0, 2.2 Hz, 1H), 3.89 (s, 3H), 3.43 (d,  $J$  = 7.9 Hz, 2H), 2.32 (s, 3H).  $^{13}\text{C NMR}$  (151 MHz, Chloroform-*d*)  $\delta$  167.83, 158.50, 156.60, 154.70, 136.54, 135.91, 131.93, 130.18, 127.99, 78.09, 77.95 (d,  $J$  = 4.3 Hz), 77.80, 64.81, 25.74 (d,  $J$  = 4.7 Hz), 20.93.  $^{19}\text{F NMR}$  (471 MHz, Chloroform-*d*)  $\delta$  -88.65 (d,  $J$  = 43.2 Hz), -91.02 (d,  $J$  = 44.8 Hz). **HRMS (ESI-MS)  $m/z$ :** [M+H] $^+$  Calcd for C<sub>12</sub>H<sub>14</sub>F<sub>2</sub>NO<sub>2</sub>: 242.0987; Found: 242.0989.

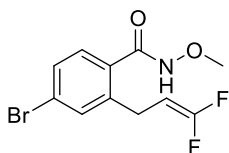

**4-bromo-2-(3,3-difluoroallyl)-N-methoxybenzamide (5g):** column solvent: DCM/MeOH = 20/1, white solid (14 mg, yield 23%);  $^1\text{H NMR}$  (500 MHz, Chloroform-*d*)  $\delta$  8.54 (s, 1H), 7.44 (s, 1H), 7.39 (d,  $J$  = 8.2 Hz, 1H), 7.21 (d,  $J$  = 8.1 Hz, 1H), 4.43 (dt,  $J$  = 24.8, 8.0 Hz, 1H), 3.87 (s, 3H), 3.45 (d,  $J$  = 8.0 Hz, 2H).  $^{13}\text{C NMR}$  (126 MHz, Chloroform-*d*)  $\delta$  157.96 (d,  $J$  = 288.9 Hz), 154.53, 141.25,

133.24, 131.08, 129.90, 128.87, 125.65, 77.26, 77.07, 64.88, 25.97 (d,  $J = 5.1$  Hz). ***<sup>19</sup>F NMR (565 MHz, Chloroform-*d*)***  $\delta$  -86.56 (d,  $J = 40.7$  Hz), -89.12 (dd,  $J = 40.6, 24.4$  Hz). ***HRMS (ESI-MS)***  $m/z$ :  $[M+H]^+$  Calcd for  $C_{11}H_{11}BrF_2NO_2$ : 305.9936, 307.9915; Found: 305.9935, 307.9915.

## Gram-Scale Experiments

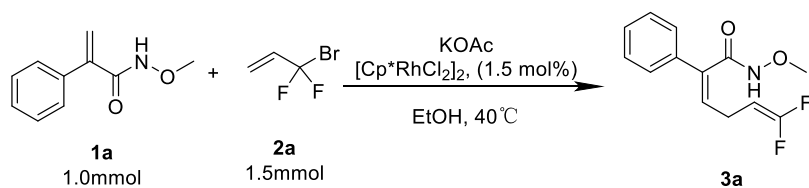

In a 100 mL reaction tube, the mixture of **1a** (177.1 mg, 1.0 mmol, 1.0 eq.), **2a** (235.4 mg, 1.5 mmol, 1.5 eq.),  $[\text{Cp}^*\text{RhCl}_2]_2$  (1.5 mol%) and KOAc (1.0 eq.) was added EtOH (5.0 mL). Then the resulting mixture was stirred at 40 °C for 4.0 h. When the reaction was finished, the products are separated by thin layer chromatography plates (DCM/MeOH = 20/1). The product **3a** was obtained as a yellow oil (199 mg, 79% yield).

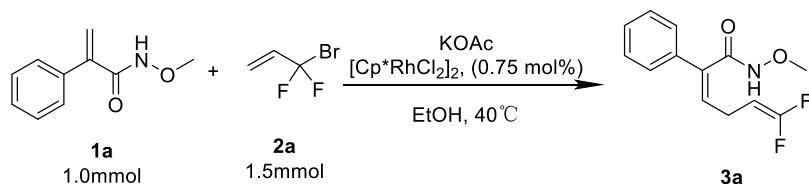

In a 100 mL reaction tube, the mixture of **1a** (177.1 mg, 1.0 mmol, 1.0 eq.), **2a** (235.4 mg, 1.5 mmol, 1.5 eq.),  $[\text{Cp}^*\text{RhCl}_2]_2$  (0.75 mol%) and KOAc (1.0 eq.) was added EtOH (5.0 mL). Then the resulting mixture was stirred at 40 °C for 4.0 h. When the reaction was finished, the products are separated by thin layer chromatography plates (DCM/MeOH = 20/1). The product **3a** was obtained as a yellow oil (176 mg, 70% yield).

## Transformation of products

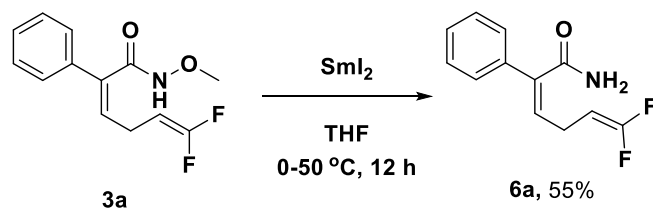

In a 10 mL reaction tube, a solution of  $\text{SmI}_2$  (4.0 mL, 0.1 M in THF) was added dropwise to a solution of **3a** (23.5 mg, 0.1 mmol, 1.0 equiv.) in dry THF (2.0 mL) at 0 °C for 30 mins, then the mixture was warmed up to 50 °C and stirred for 12 h. And then saturated sodium carbonate solution (5.0 mL) was dropped to quench the reaction, and extracted with EtOAc (10.0 ml x 2) and the combined organic layers were washed with brine, then the combined organic layer was dried ( $\text{MgSO}_4$ ) and concentrated. The products are separated by thin layer chromatography plates

(DCM/MeOH = 20/1), the product **6a** was obtained as a white solid (12 mg, 55% yield). The product **6a** was directly used for <sup>1</sup>H-NMR analysis.

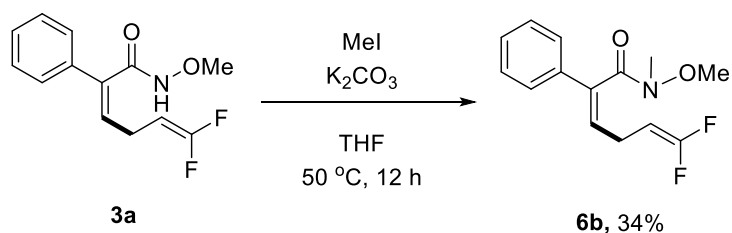

To a solution of **3a** (0.2 mmol) in THF (2.0 mL) was added K<sub>2</sub>CO<sub>3</sub> (2.0 equiv.) and MeI (3.0 equiv.), then the mixture was warmed up to 50°C and stirred for 12 h. When the reaction was finished, THF was removed under vacuum, the residue was extracted with EtOAc (10.0 ml x 2) and the combined organic layers were washed with brine, then the combined organic layer was dried (MgSO<sub>4</sub>) and concentrated. The products are separated by thin layer chromatography plates (DCM/MeOH = 40/1), the product **6b** was obtained as a white solid (18 mg, 34% yield). The product **6b** was directly used for <sup>1</sup>H-NMR analysis.

### Characterization Data of Products 6

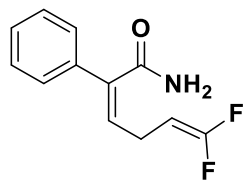

**(Z)-6,6-difluoro-2-phenylhexa-2,5-dienamide (6a):** column solvent: DCM/MeOH = 20:1, white solid (12 mg, yield 55%); <sup>1</sup>H NMR (600 MHz, DMSO-*d*<sub>6</sub>) δ 7.69 (s, 1H), 7.49 (s, 1H), 7.43 – 7.38 (m, 2H), 7.38 – 7.32 (m, 2H), 7.31 – 7.25 (m, 1H), 5.93 (t, *J* = 7.5 Hz, 1H), 4.62 (dtd, *J* = 26.6, 7.7, 2.5 Hz, 1H), 2.90 (tt, *J* = 7.7, 1.8 Hz, 2H). <sup>13</sup>C NMR (151 MHz, DMSO-*d*<sub>6</sub>) δ 169.81, 157.28, 155.39 (d, *J* = 3.4 Hz), 153.50, 139.63, 136.59, 128.49, 127.62, 125.73, 124.84 (d, *J* = 2.5 Hz), 77.40, 77.26 (d, *J* = 3.6 Hz), 77.13, 22.61 (d, *J* = 4.9 Hz). <sup>19</sup>F NMR (565 MHz, DMSO-*d*<sub>6</sub>) δ -89.28 (d, *J* = 47.5 Hz), -91.07 (dd, *J* = 47.9, 26.5 Hz). HRMS (ESI-MS) *m/z*: [M+H]<sup>+</sup> Calcd for C<sub>12</sub>H<sub>12</sub>F<sub>2</sub>NO: 224.0881; Found: 224.0883.

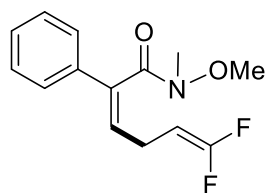

**(Z)-6,6-difluoro-N-methoxy-N-methyl-2-phenylhexa-2,5-dienamide(6b):** column solvent: DCM/MeOH = 40:1, white solid (18 mg, yield 34%); <sup>1</sup>H NMR (500 MHz, Chloroform-d) δ 7.42 – 7.31 (m, 5H), 5.93 (t, *J* = 7.6 Hz, 1H), 4.29 (dtd, *J* = 25.1, 7.8, 2.1 Hz, 1H), 3.35 (s, 3H), 3.30 (s, 3H), 2.90 (t, *J* = 7.8 Hz, 2H). <sup>13</sup>C NMR (151 MHz, Chloroform-d) δ 170.13, 158.43, 156.53, 154.62, 138.20, 136.58, 128.99, 128.65, 127.90, 127.12, 125.71, 76.40, 76.26, 76.12, 61.37, 32.14, 23.24 (d, *J* = 5.1 Hz). <sup>19</sup>F NMR (471 MHz, Chloroform-d) δ -88.17 (d, *J* = 45.1 Hz), -90.25 (d, *J* = 43.1 Hz). HRMS (ESI-MS) *m/z*: [M+H]<sup>+</sup> Calcd for C<sub>14</sub>H<sub>16</sub>F<sub>2</sub>NO<sub>2</sub>: 268.1144; Found: 268.1145.

## KIE Study

Two parallel reactions for KIE value measurement

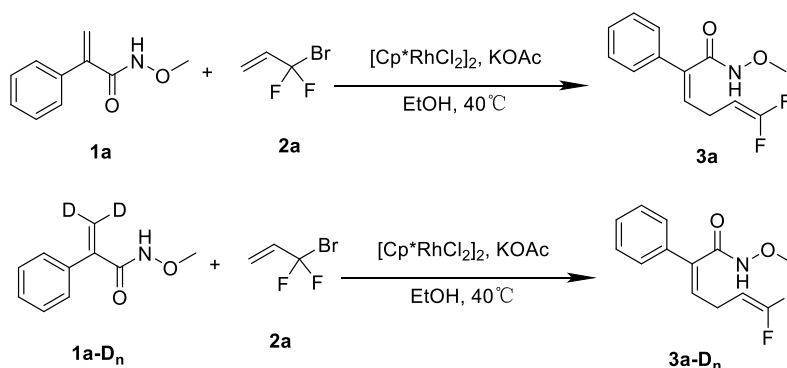

To a mixture of **1a** (17.7 mg, 0.1 mmol, 1.0 eq.), **2a** (15.7 mg, 0.15 mmol, 1.5 eq.), [Cp\*RhCl<sub>2</sub>]<sub>2</sub> (1.9 mg, 0.003 mmol, 3 mol%) and KOAc (14.7 mg, 0.15 mmol, 1.5 eq.), in a 10 mL reaction tube was added EtOH (2.0 mL). Then the resulting mixture was stirred at the temperature for 1.0 h. The reaction was finished to provide the product **3a** (18.0 mg, 72% yield).

To a mixture of **1a-D** (17.9 mg, 0.1 mmol, 1.0 eq.), **2a** (15.7 mg, 0.15 mmol, 1.5 eq.), [Cp\*RhCl<sub>2</sub>]<sub>2</sub> (1.9 mg, 0.003 mmol, 3 mol%) and KOAc (14.7 mg, 0.15 mmol, 1.5 eq.), in a 10 mL reaction tube was added EtOH (2.0 mL). Then the resulting mixture was stirred at the temperature for 1.0 h. The reaction was finished to provide the product **3a-D<sub>n</sub>** (12.0 mg, 48% yield). The ratio of **3a/3a-D<sub>n</sub>** was 1.5 (18/12)



## References

- [1] Liu, Y.; Xie, F.; Jia, A.-Q.; Li, X. Cp\*Co(iii)-catalyzed amidation of olefinic and aryl C–H bonds: highly selective synthesis of enamides and pyrimidones. *Chem. Commun.* **2018**, *54*, 4345-4348.
- [2] Wu, X.; Ji, H. Ruthenium-Catalyzed C–H Alkylation of Alkenes with Allyl Alcohols via C–H Bond Activation in Aqueous Solution. *J. Org. Chem.* **2018**, *83*, 12094-12102.
- [3] Li, W.; Zhou, H.; He, Y.; Zeng, G.; Zheng, Y.; Hu, Y.; Chen, Z.; Ge, J.-Y.; Lv, N.; Chen, J. Synthesis of Diverse  $\gamma$ -Lactams via Rh-Catalyzed C(sp<sup>2</sup>)–H Addition to Aliphatic Nitriles. *Org. Lett.* **2022**, *24*, 5090-5094.
- [4] Yu, C.; Li, F.; Zhang, J.; Zhong, G. A direct cross-coupling reaction of electron-deficient alkenes using an oxidizing directing group. *Chem. Commun.*, **2017**, *53*, 533-536.
- [5] Li, X.; Cheng, H.; Shao, J.; Zhang, G.; Zhang, S. Rh(III)-Catalyzed [4+1] Annulation of Benzamides with Vinyl Cyclic Carbonates for the Synthesis of Isoindolinones. *Org. Lett.* **2024**, *26*, 1304-1309.
- [6] Lei, J.; Li, M.; Zhang, Q.; Liu, S.; Li, H.; Shi, L.; Jiang, W.-F.; Duan, C.; Jin, Y. Visible light-induced radical cascade cross-coupling via C(sp<sup>3</sup>)–H activation and C–N/N–O cleavage: a feasible access to methylenebisamide derivatives. *Org. Lett.* **2023**, *25*, 2300-2305.

# Copies of $^1\text{H}$ , $^{13}\text{C}$ NMR and $^{19}\text{F}$ NMR spectra

## 2-cyclohexyl-*N*-methoxyacrylamide(1t)

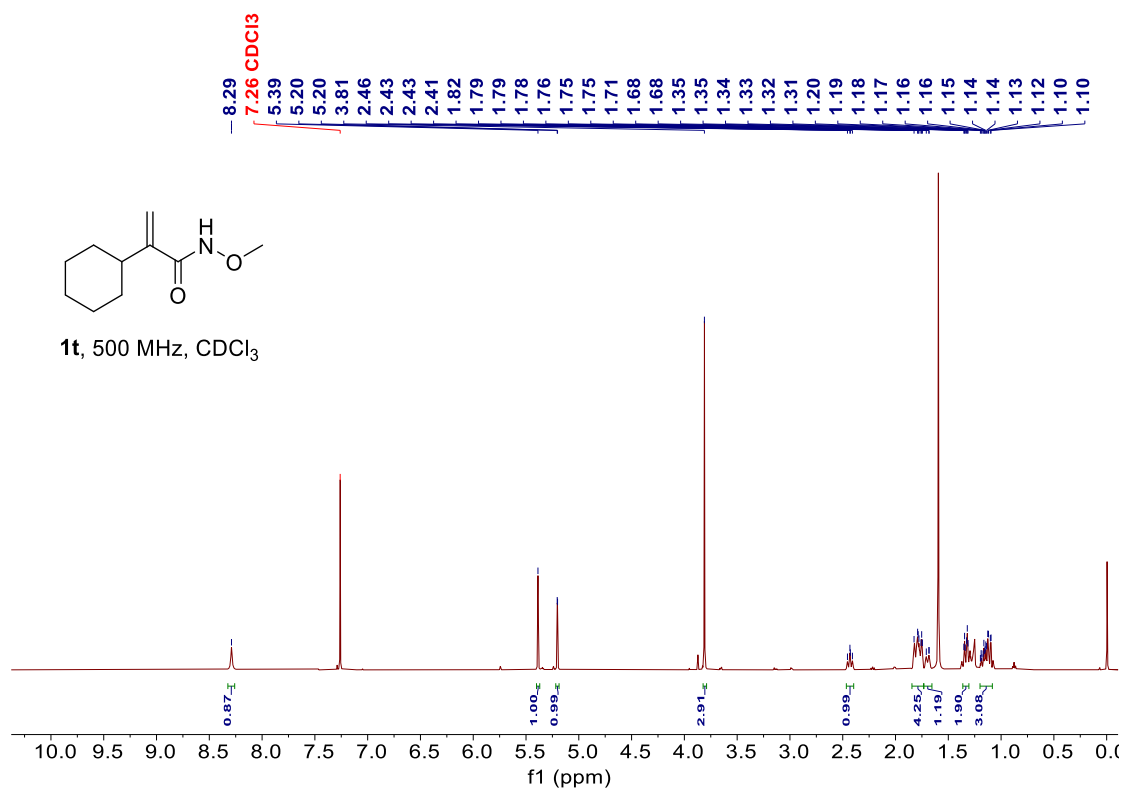

**(Z)-6,6-difluoro-N-methoxy-2-phenylhexa-2,5-dienamide (3a)**

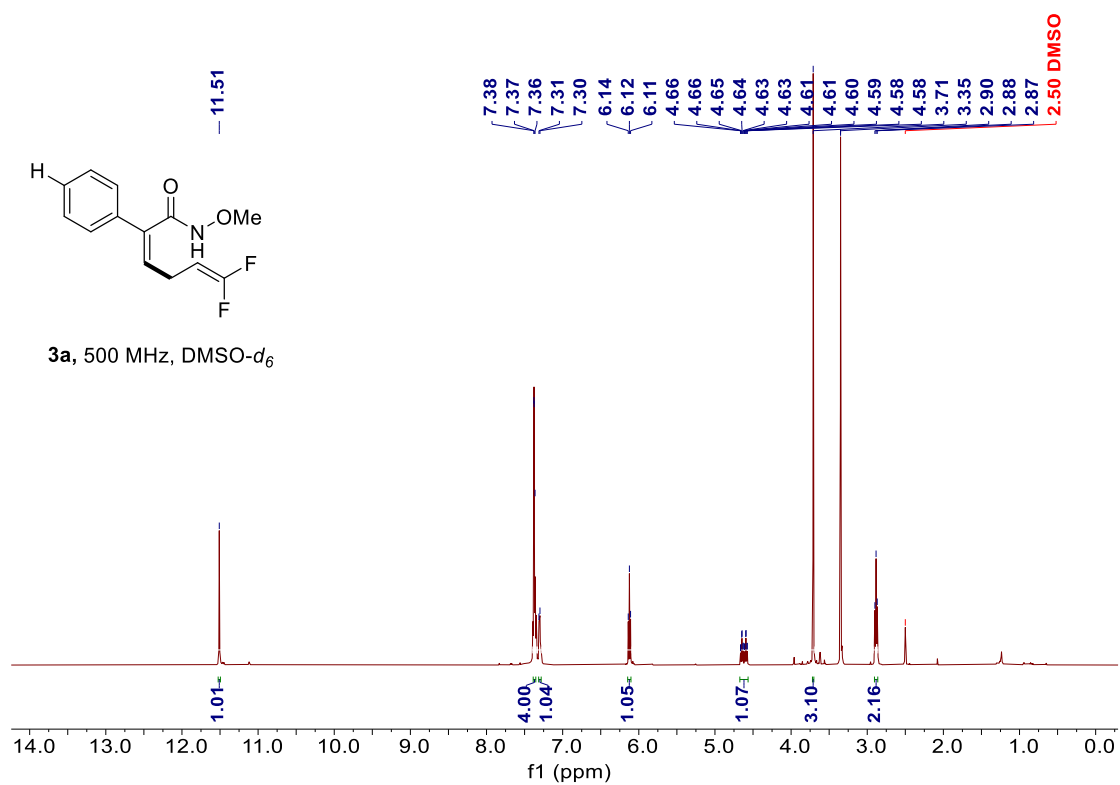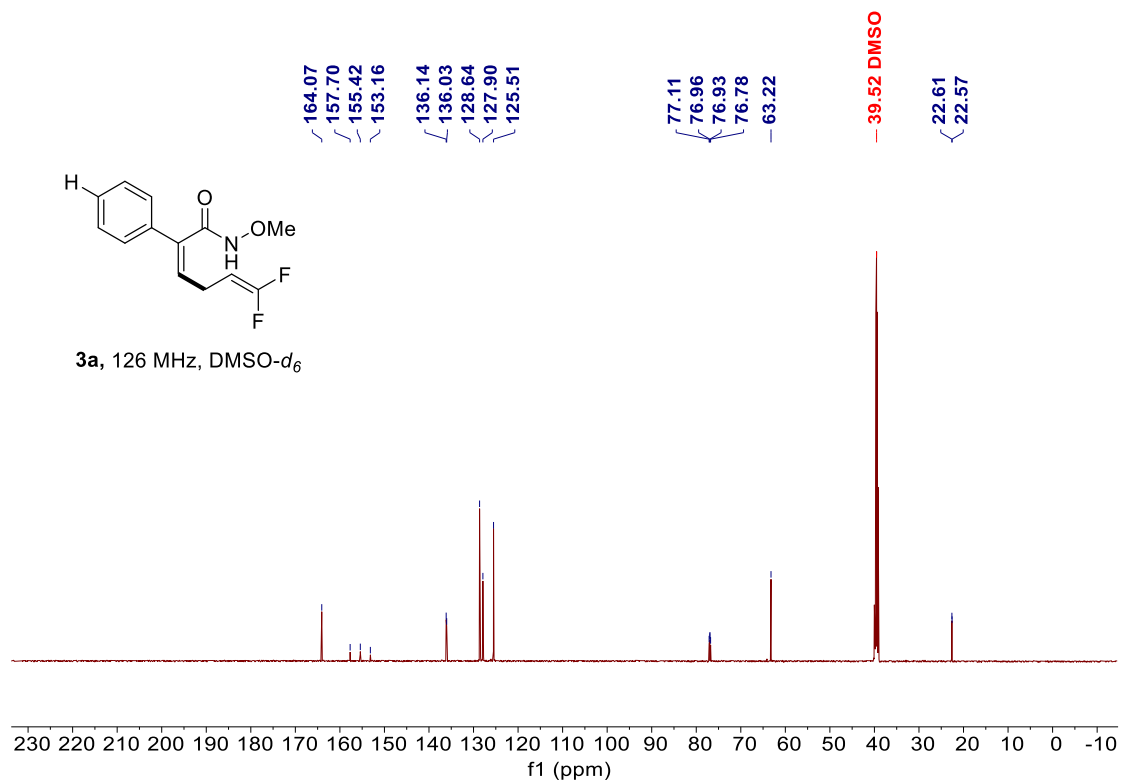

**<sup>19</sup>F NMR spectrum for product 3a**

-87.69  
-87.78  
-89.68  
-89.77

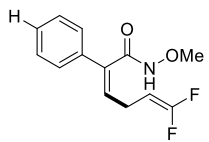

**3a**, 471 MHz, DMSO-*d*<sub>6</sub>

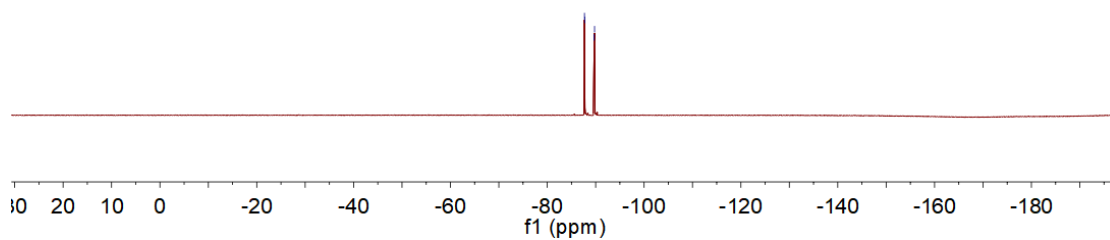

**(Z)-6,6-difluoro-N-methoxy-2-(p-tolyl)hexa-2,5-dienamide (3b)**

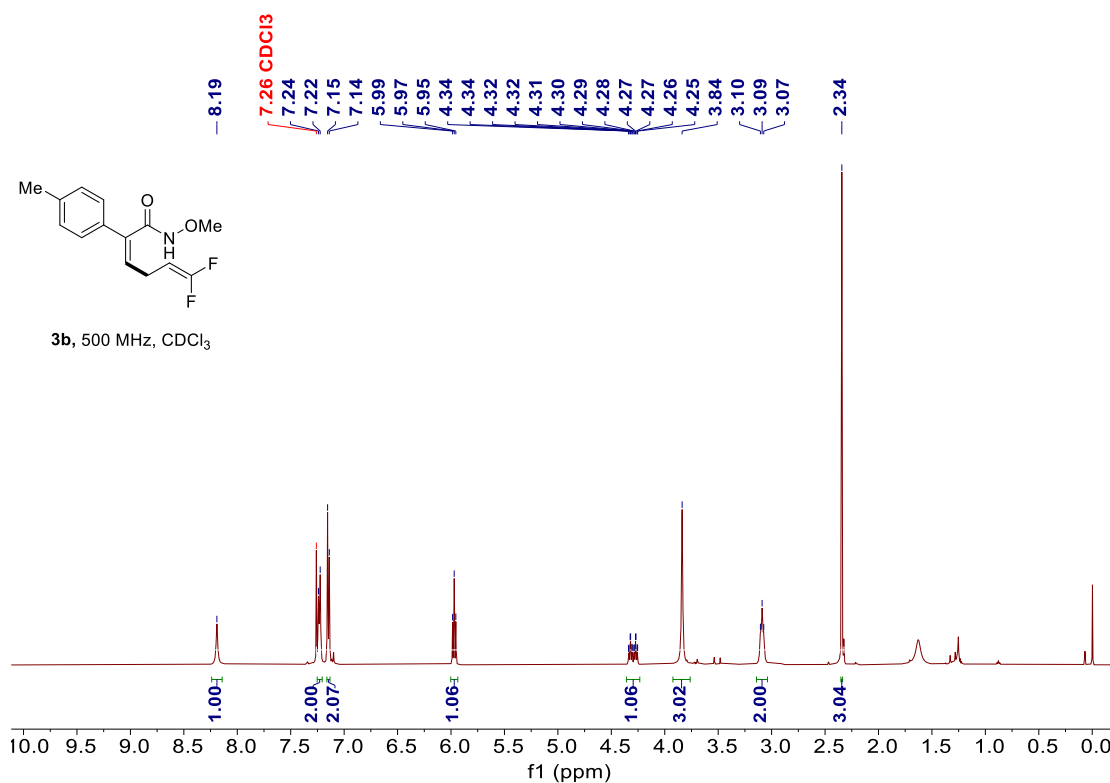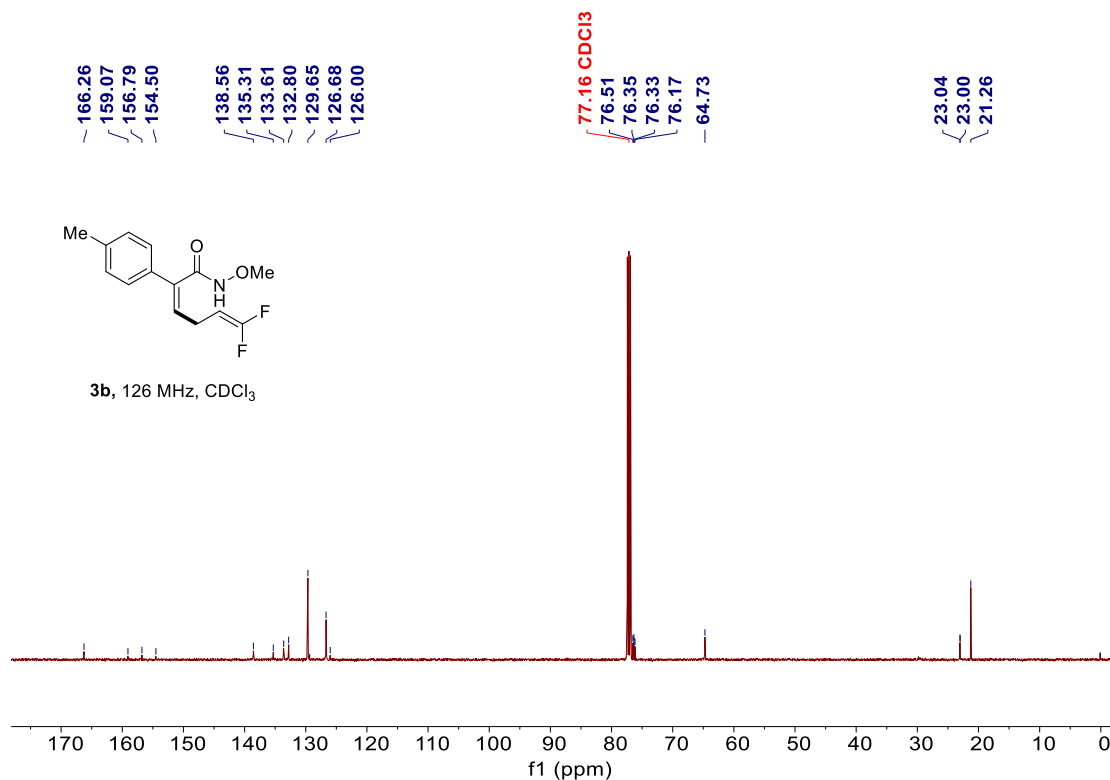

**<sup>19</sup>F NMR spectrum for product 3b**

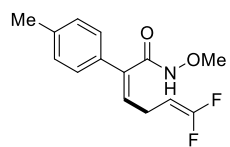

**3b**, 471 MHz, CDCl<sub>3</sub>

-87.80  
-87.89  
-89.78  
-89.88

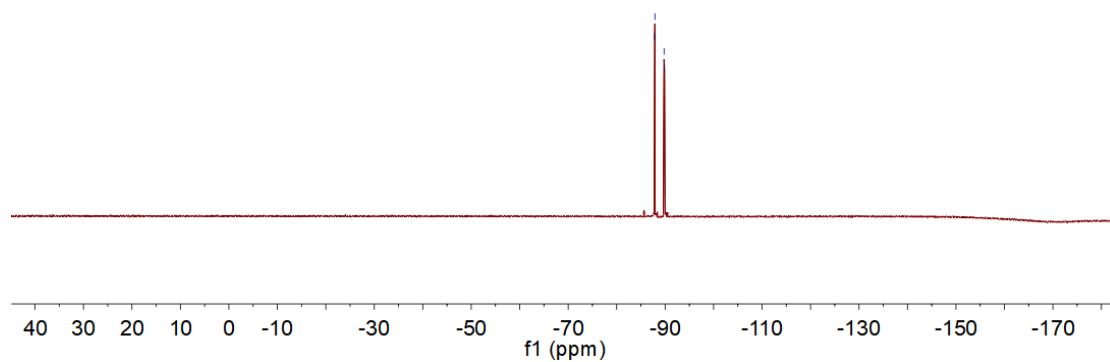

**(Z)-6,6-difluoro-N-methoxy-2-(4-(trifluoromethyl)phenyl)hexa-2,5-dienamide (3c)**

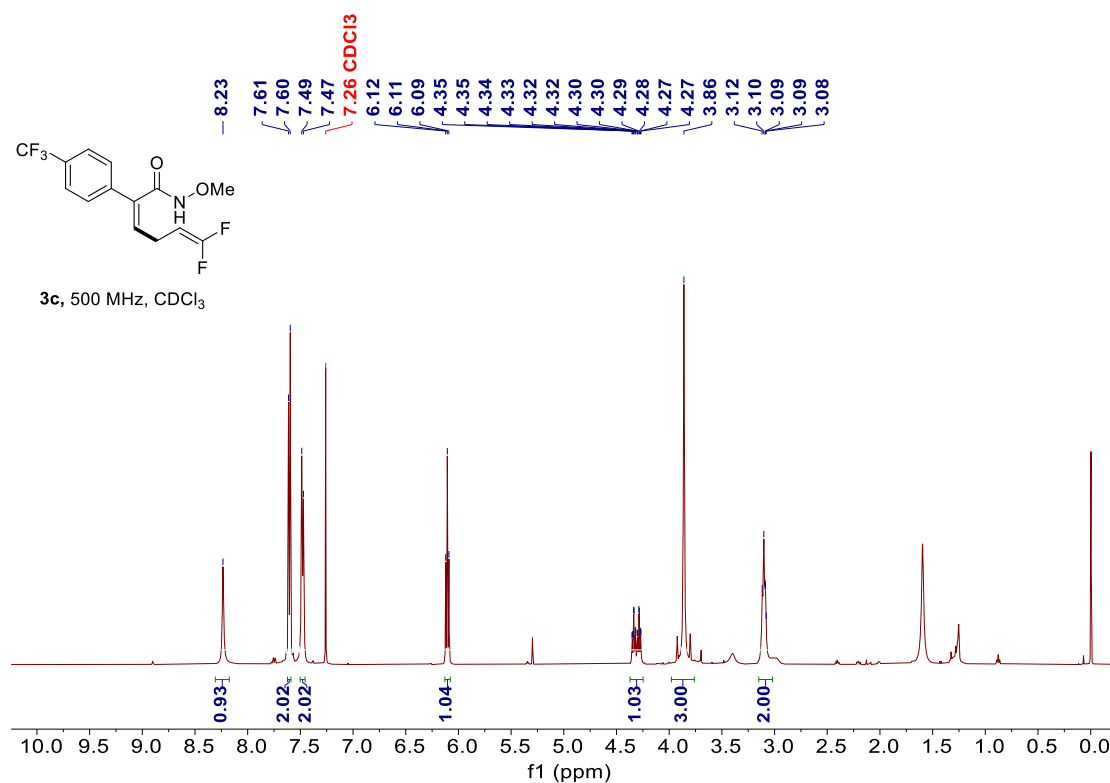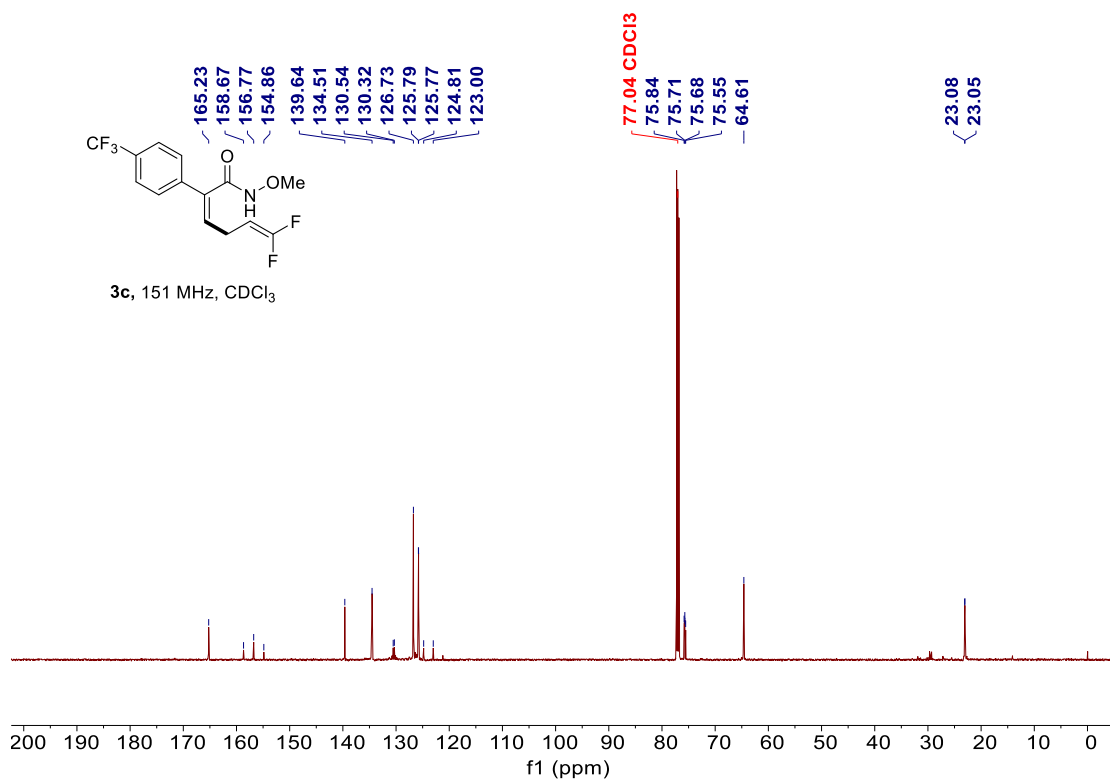

**<sup>19</sup>F NMR spectrum for product 3c**

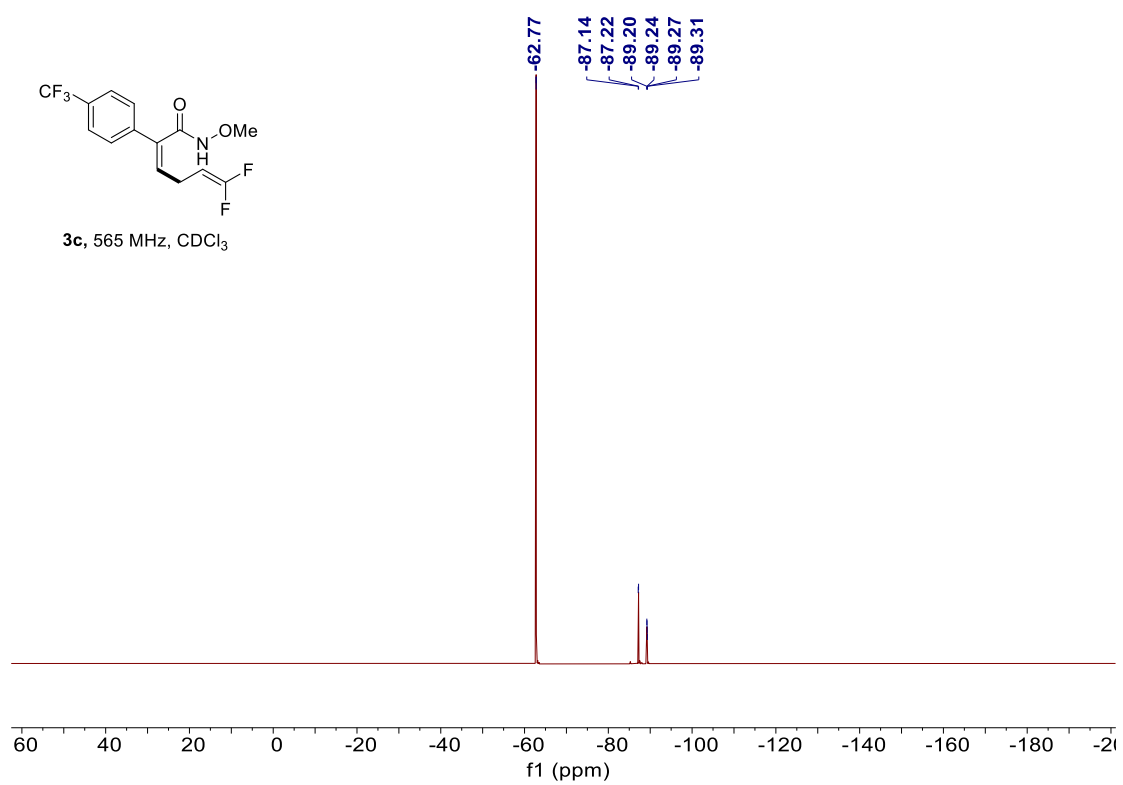



**(Z)-6,6-difluoro-N-methoxy-2-(4-methoxyphenyl)hexa-2,5-dienamide (3d)**

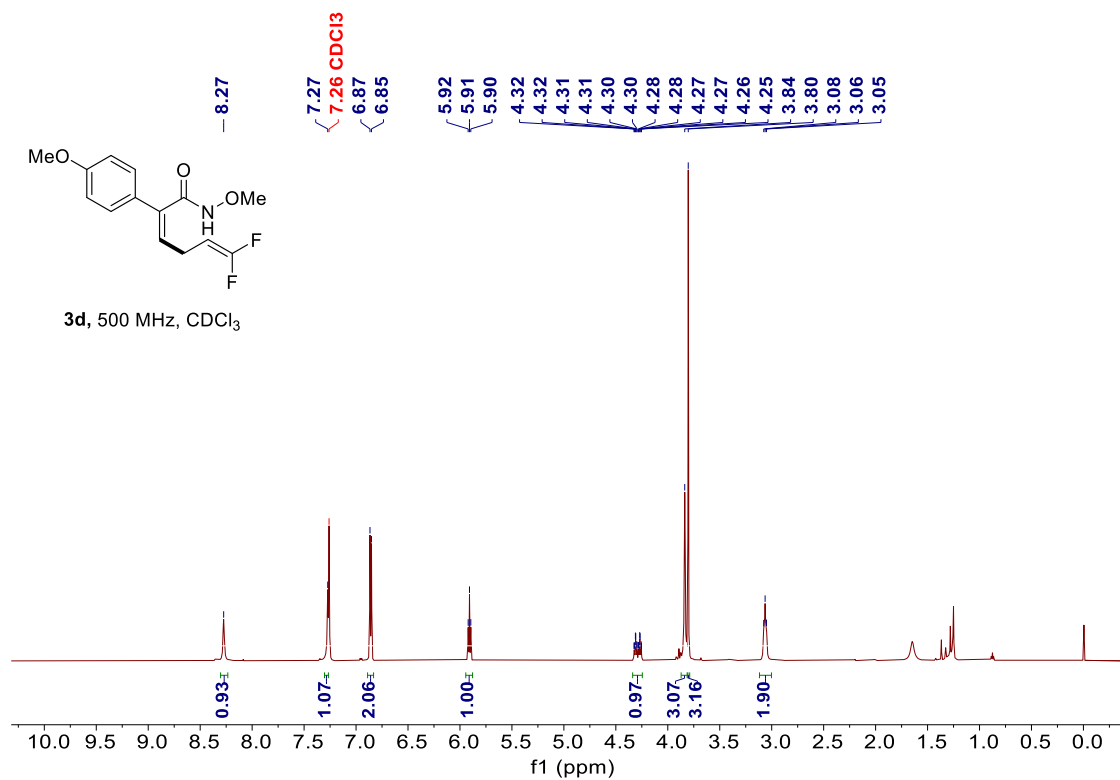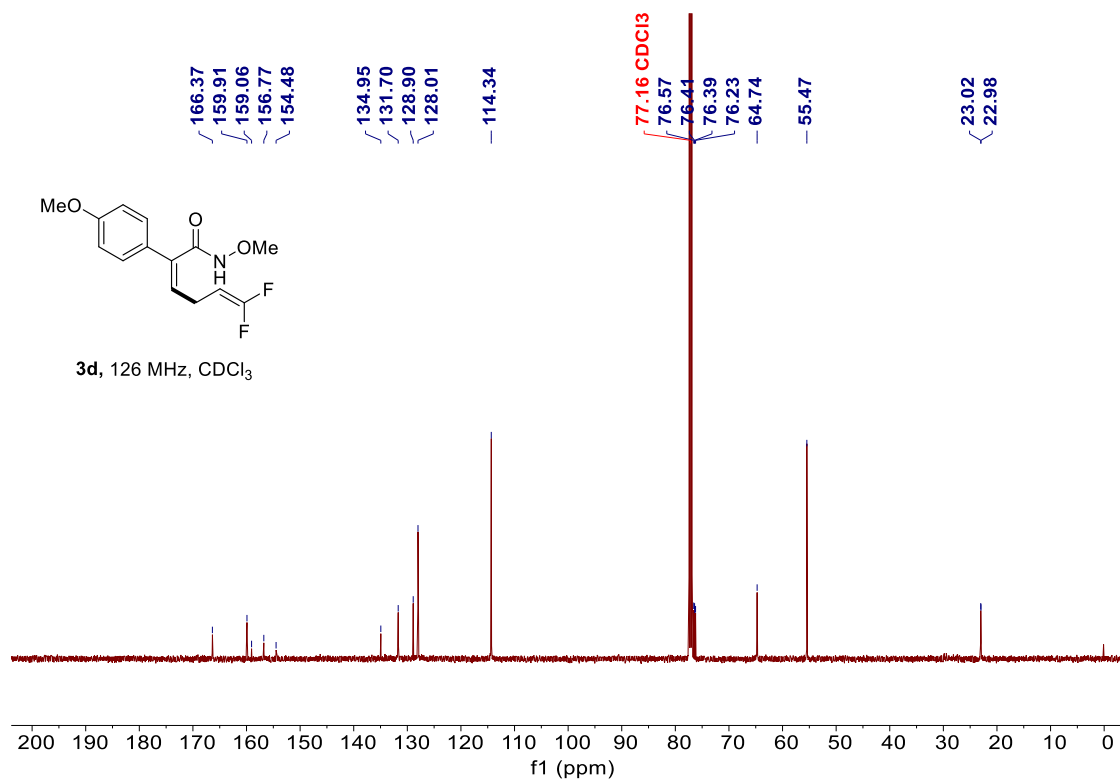

**<sup>19</sup>F NMR spectrum for product 3d**

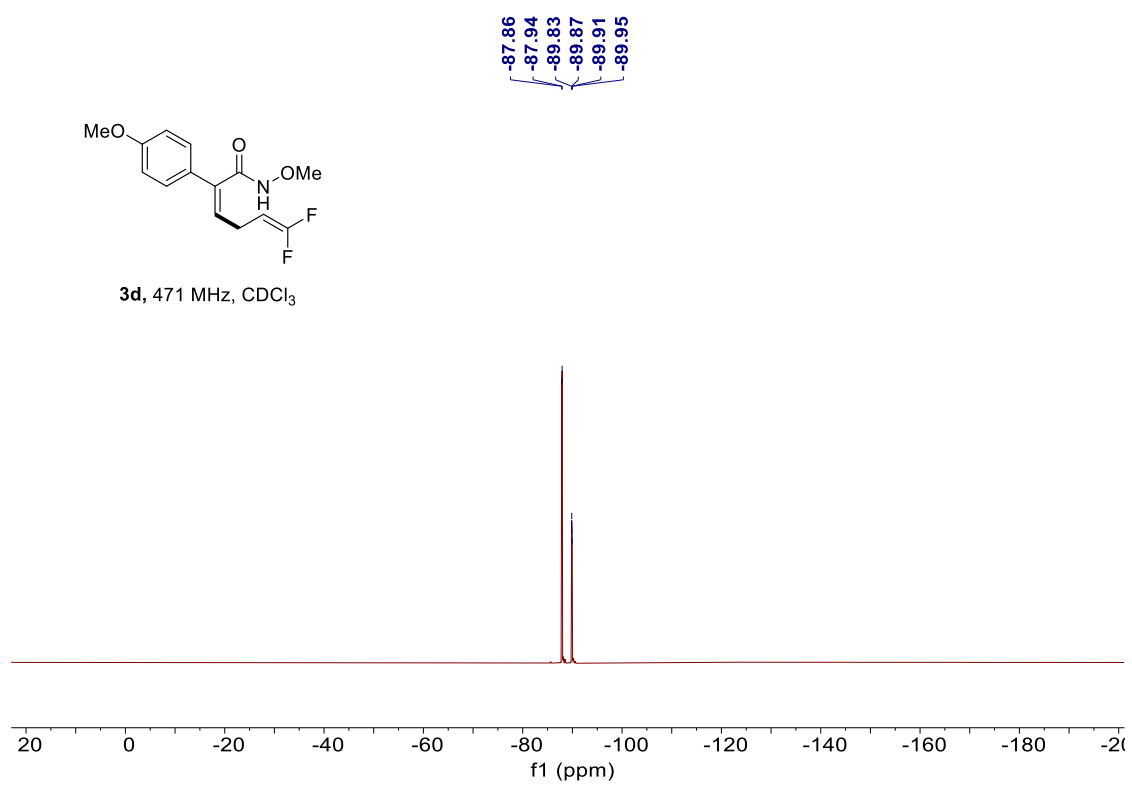

**(Z)-2-(4-bromophenyl)-6,6-difluoro-N-methoxyhexa-2,5-dienamide (3e)**

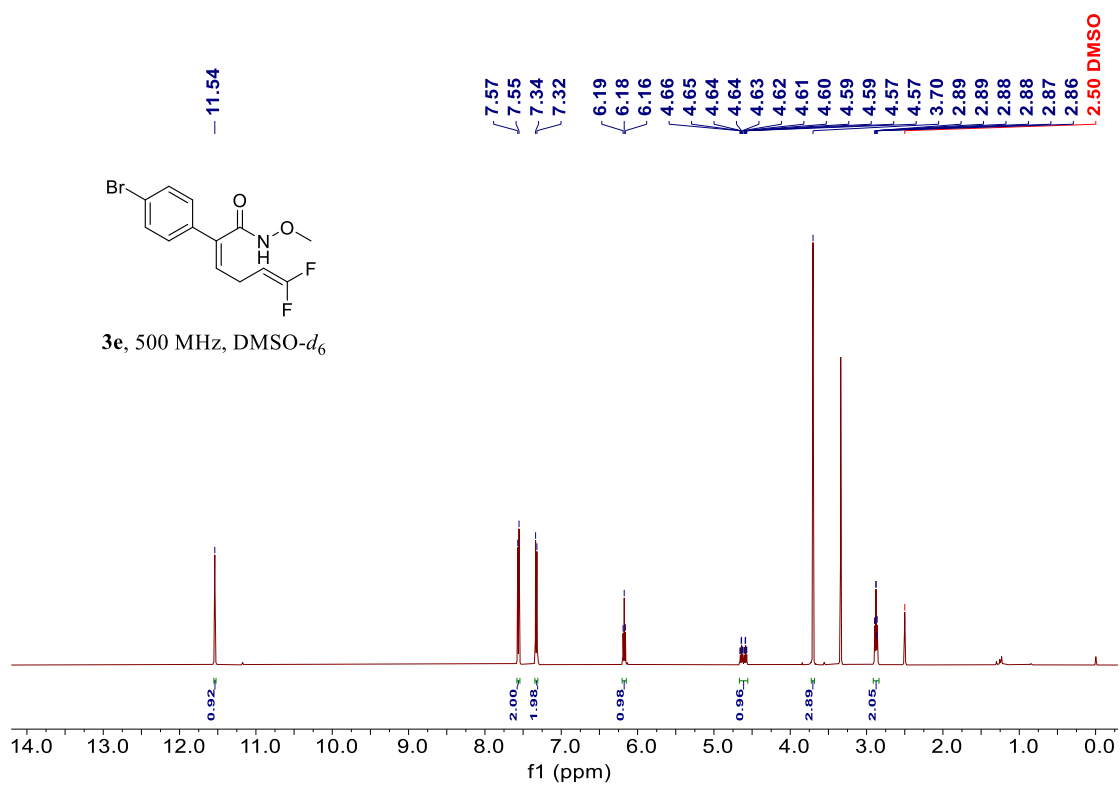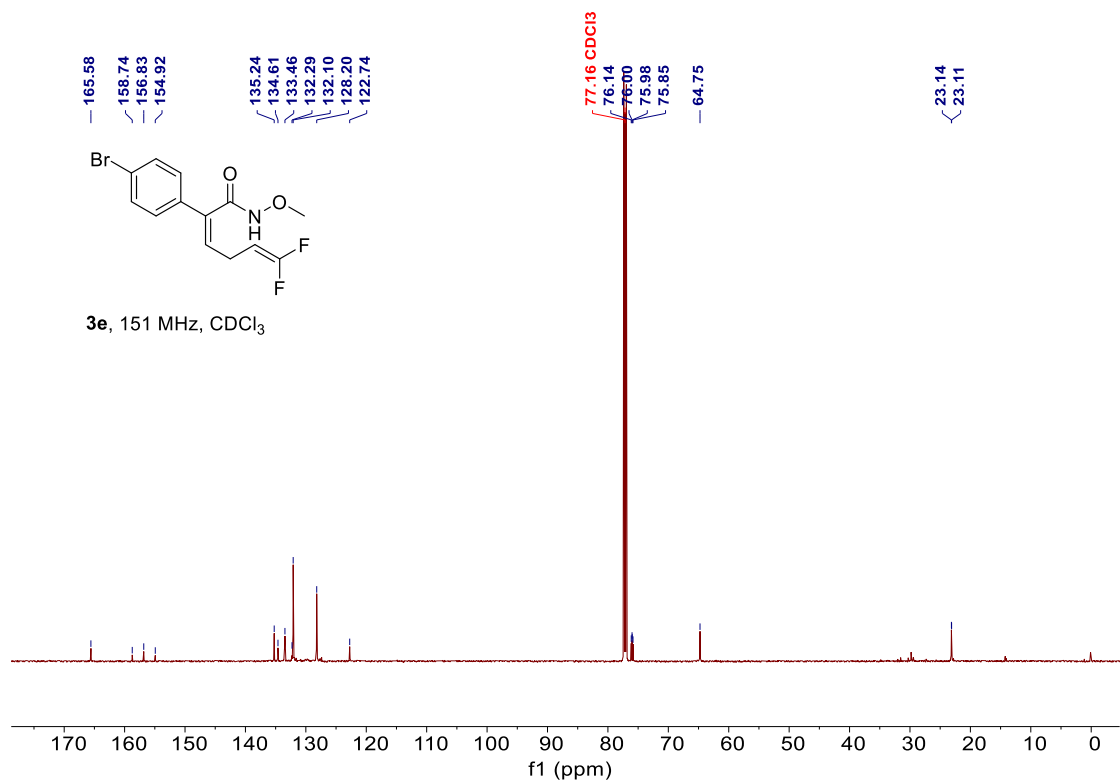

**<sup>19</sup>F NMR spectrum for product 3e**

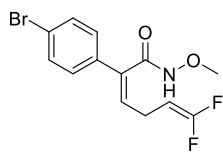

3e, 471 MHz, CDCl<sub>3</sub>

-87.29  
-87.38  
-89.32  
-89.41

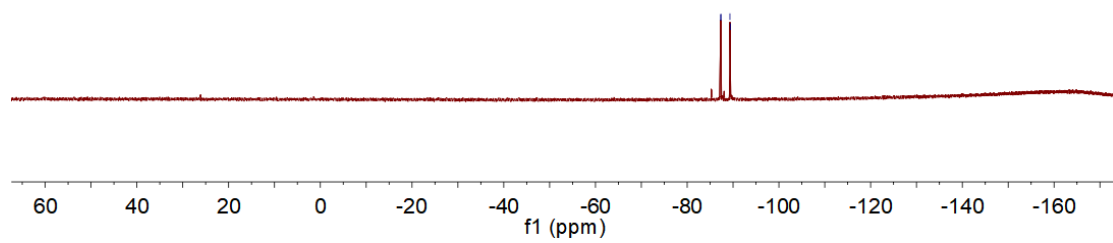

**(Z)-2-(4-chlorophenyl)-6,6-difluoro-N-methoxyhexa-2,5-dienamide (3f)**

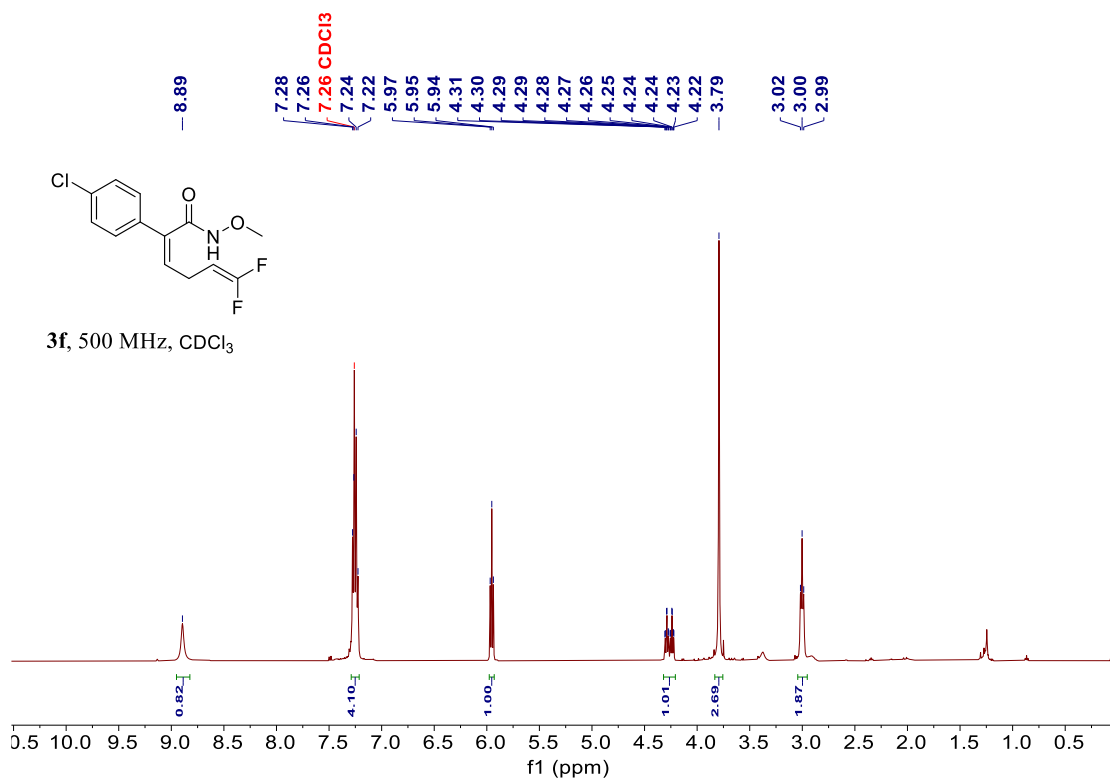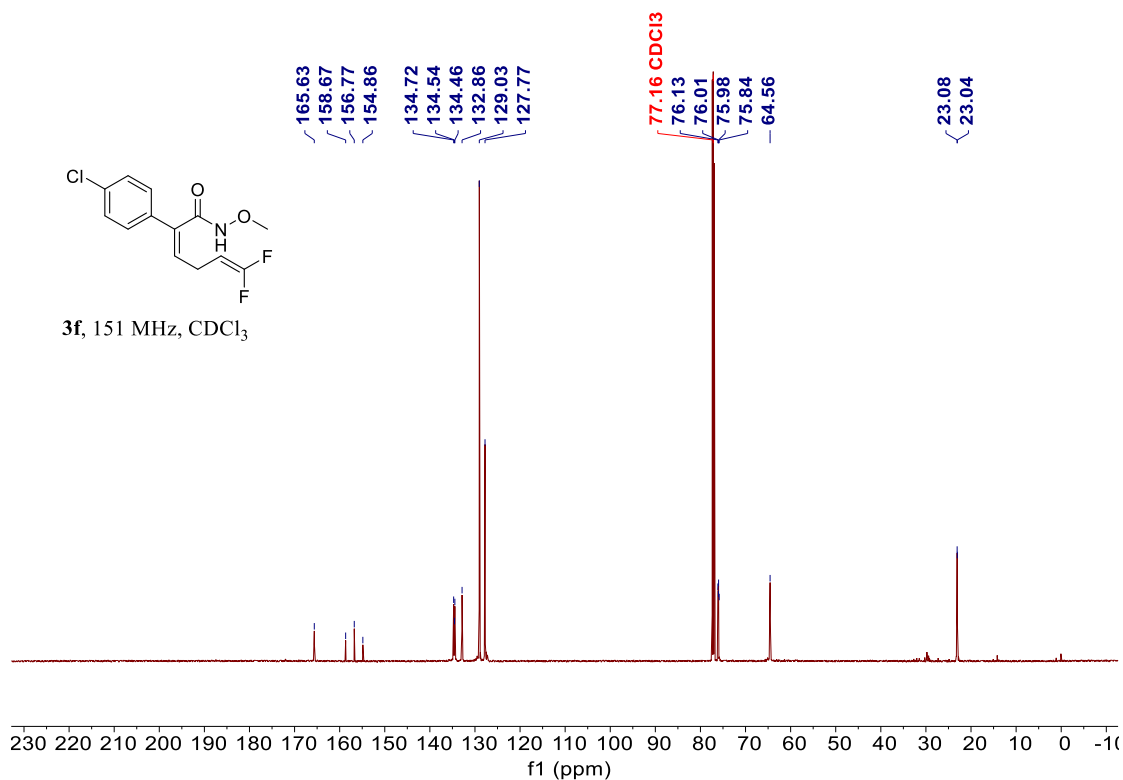

**<sup>19</sup>F NMR spectrum for product 3f**

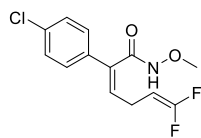

**3f**, 471MHz, CDCl<sub>3</sub>

-87.45  
-87.54  
-89.52  
-89.61

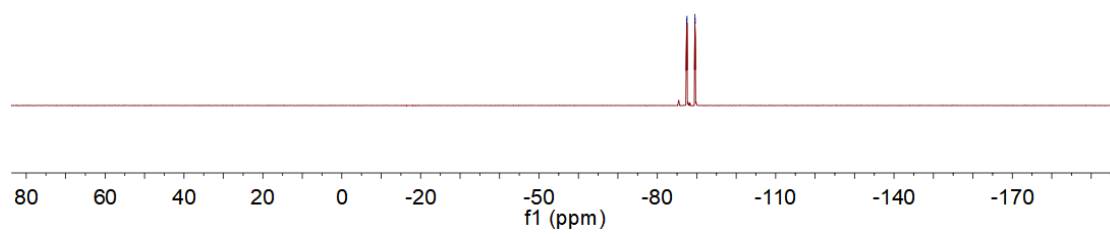

(Z)-6,6-difluoro-2-(4-fluorophenyl)-N-methoxyhexa-2,5-dienamide (3g)

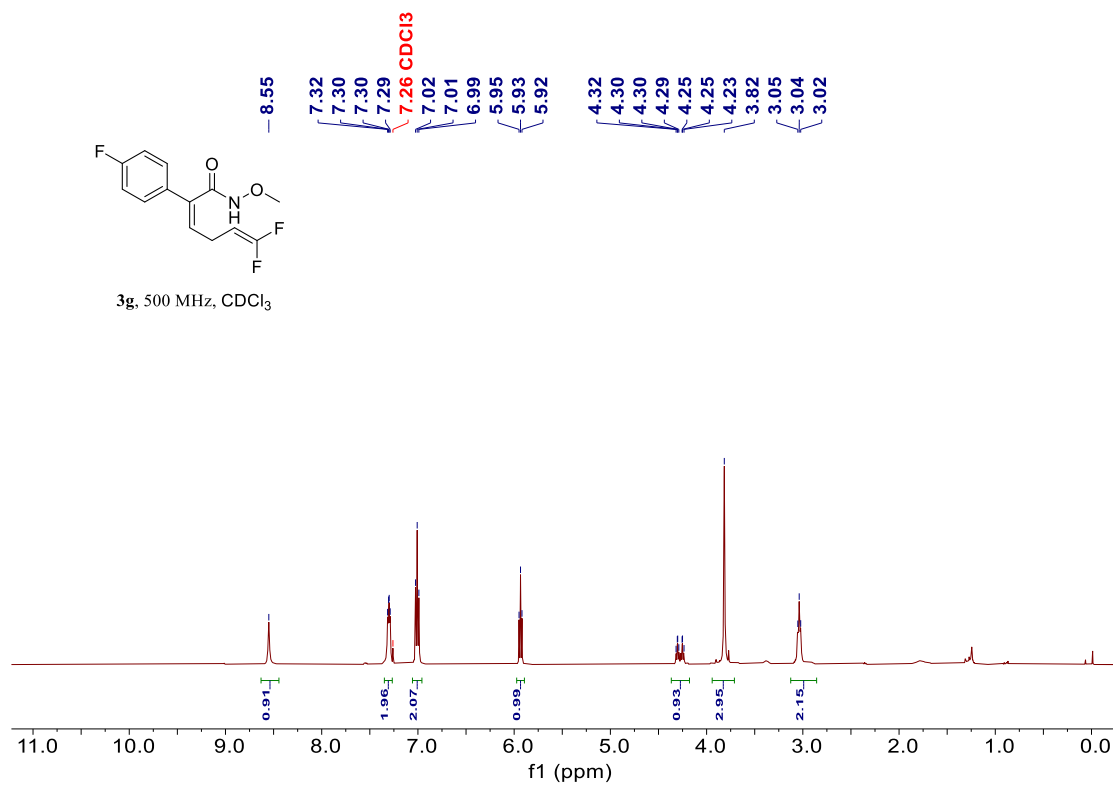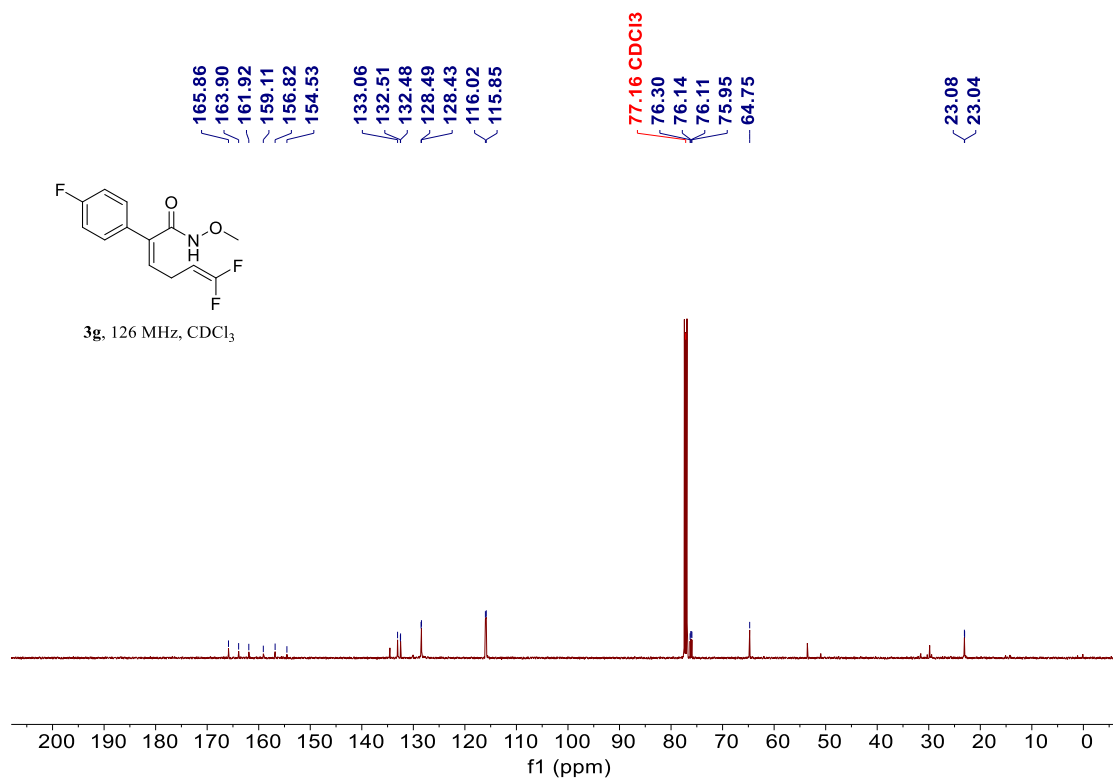

**<sup>19</sup>F NMR spectrum for product 3g**

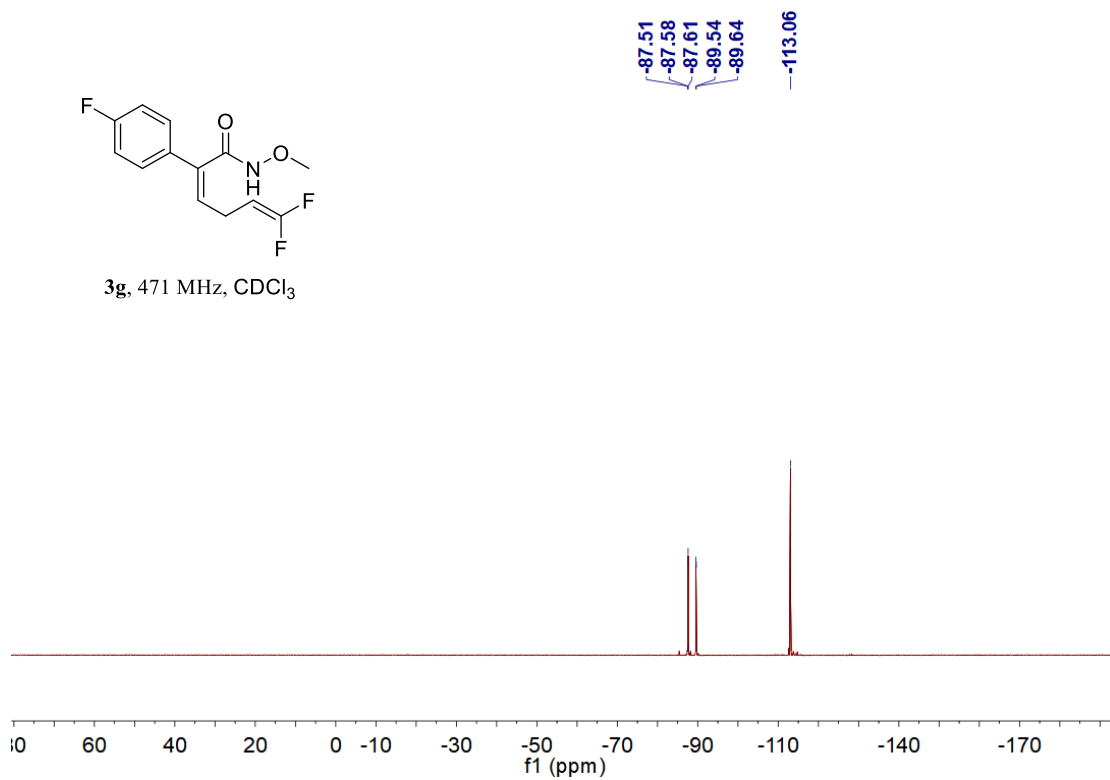



**(Z)-2-(3-chlorophenyl)-6,6-difluoro-N-methoxyhexa-2,5-dienamide (3h)**

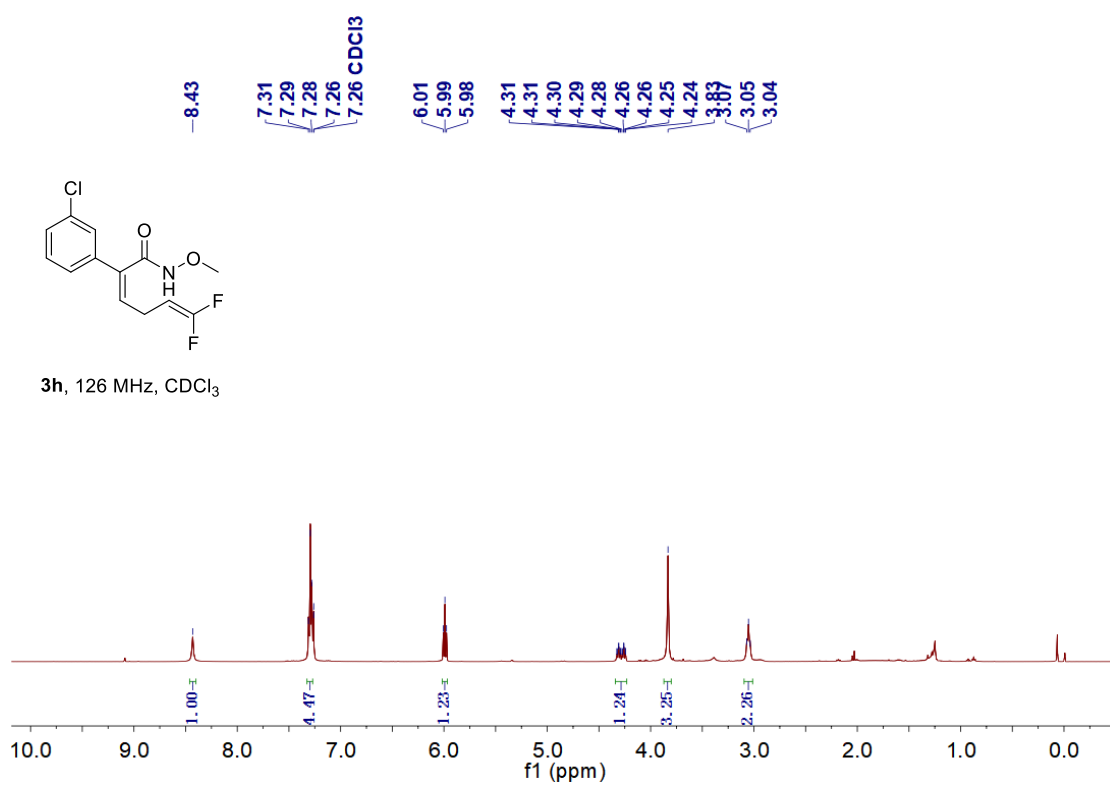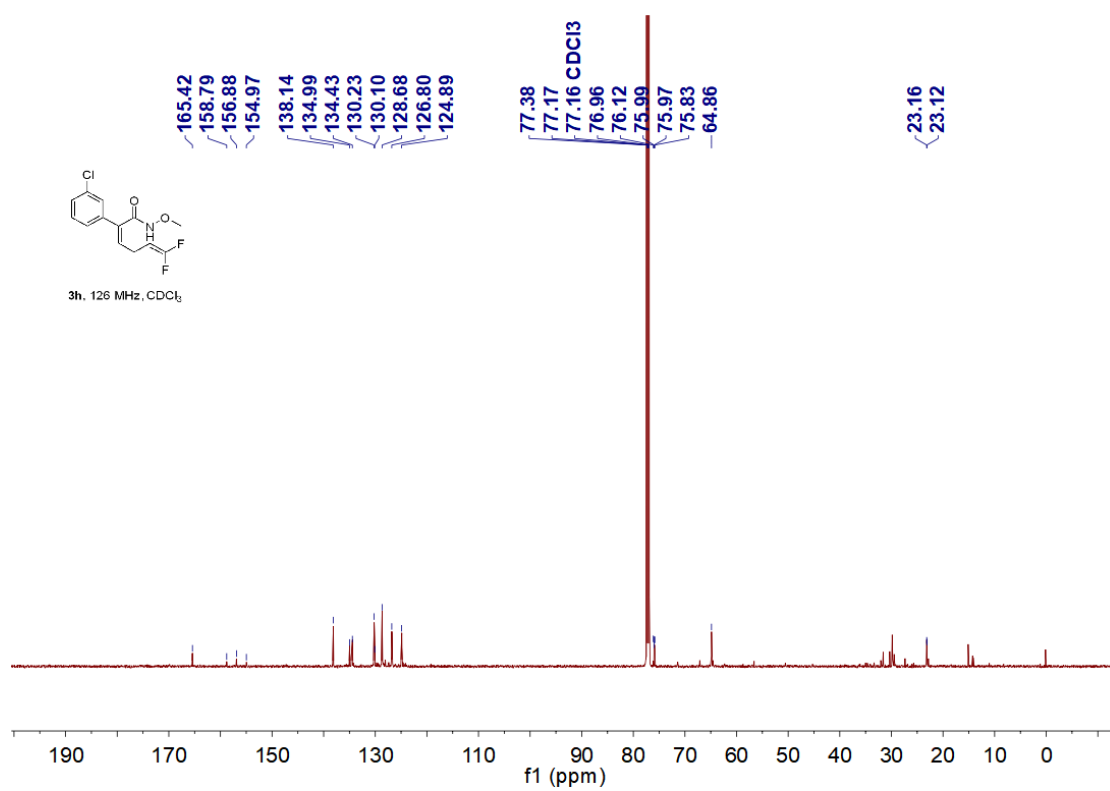

**<sup>19</sup>F NMR spectrum for product 3h**

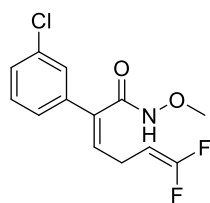

**3h**, 471 MHz, CDCl<sub>3</sub>

-87.25  
-87.34  
-89.28  
-89.37

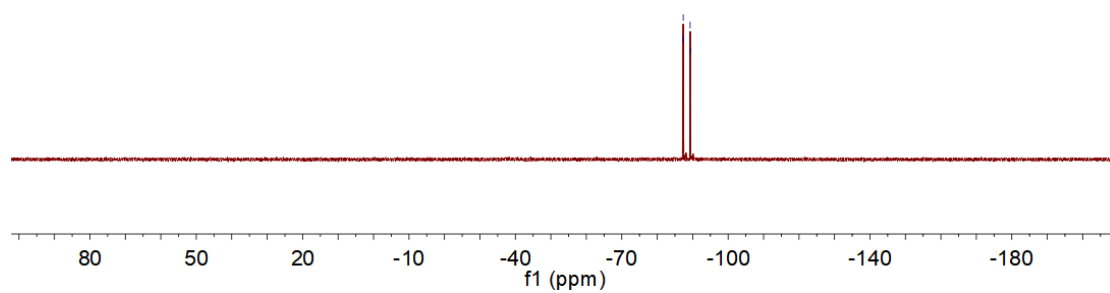

**(Z)-6,6-difluoro-N-methoxy-2-(3-methoxyphenyl)hexa-2,5-dienamide (3i)**

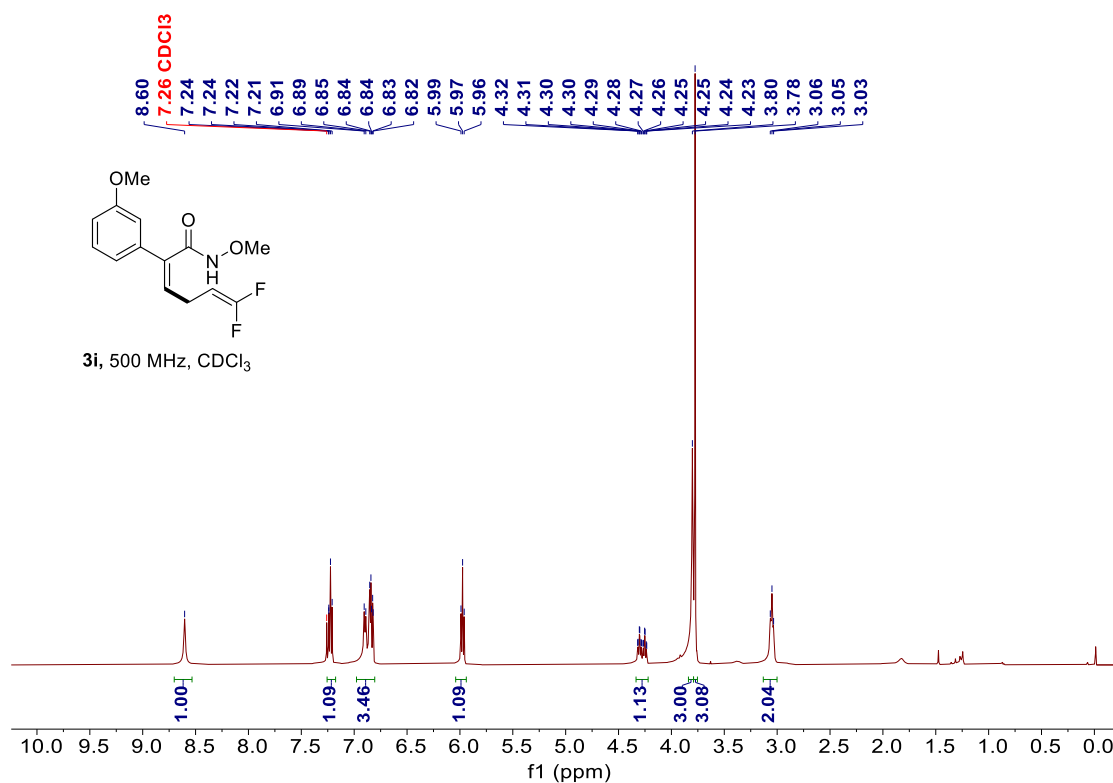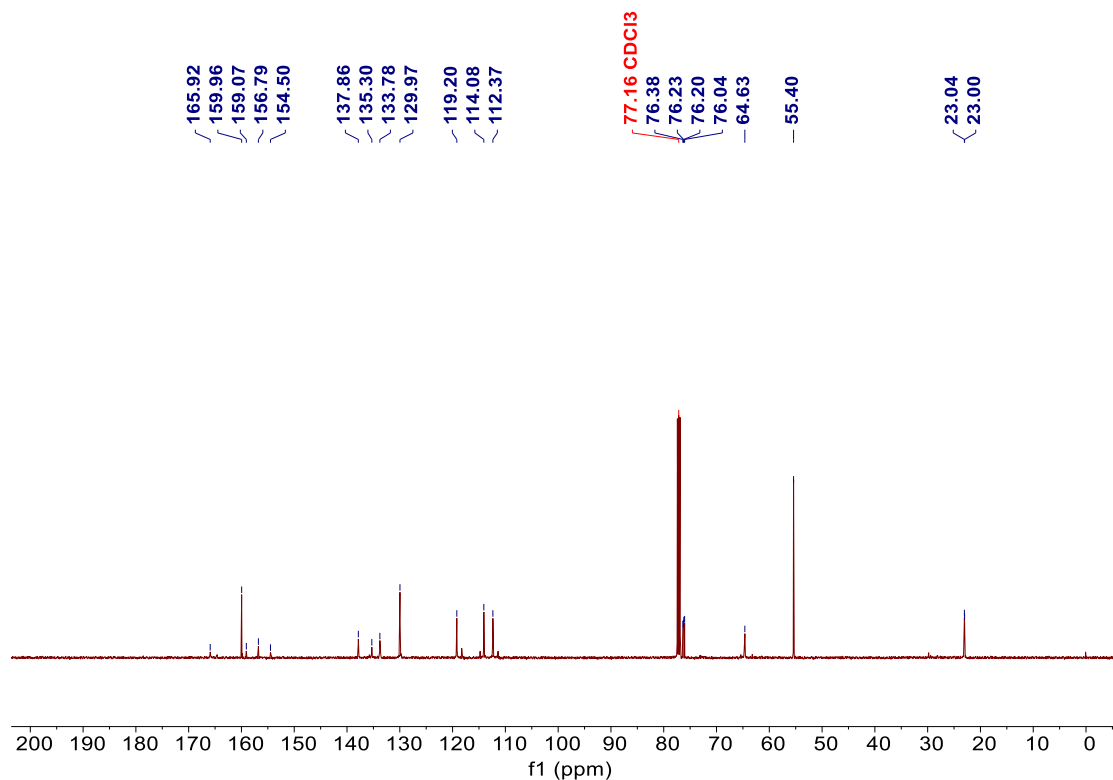

**<sup>19</sup>F NMR spectrum for product 3i**

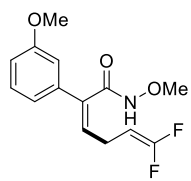

3i, 471 MHz, CDCl<sub>3</sub>

-87.75  
-87.85  
-89.77  
-89.86

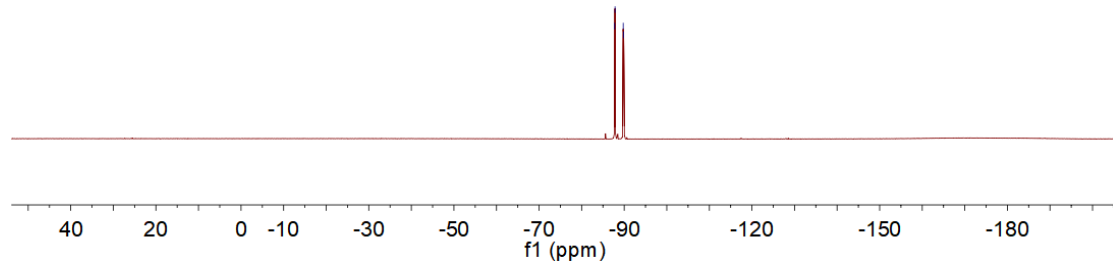



**<sup>19</sup>F NMR spectrum for product 3j**

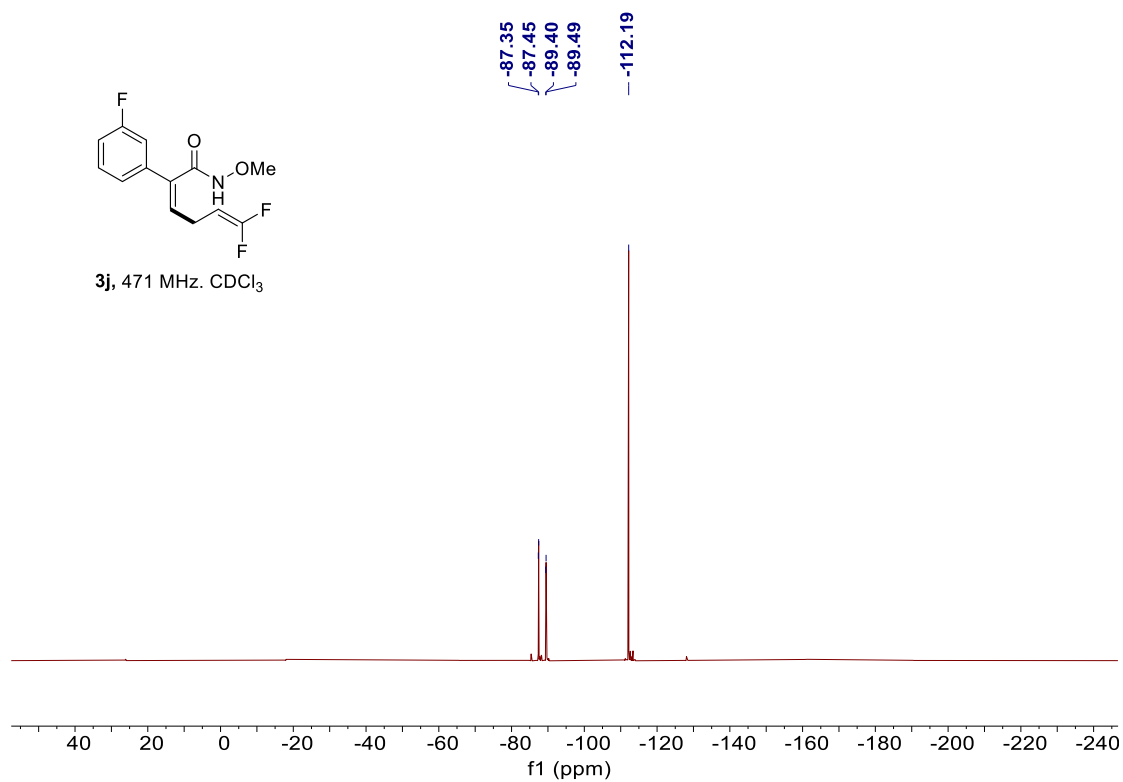

**(Z)-6,6-difluoro-N-methoxy-2-(m-tolyl)hexa-2,5-dienamide (3k)**

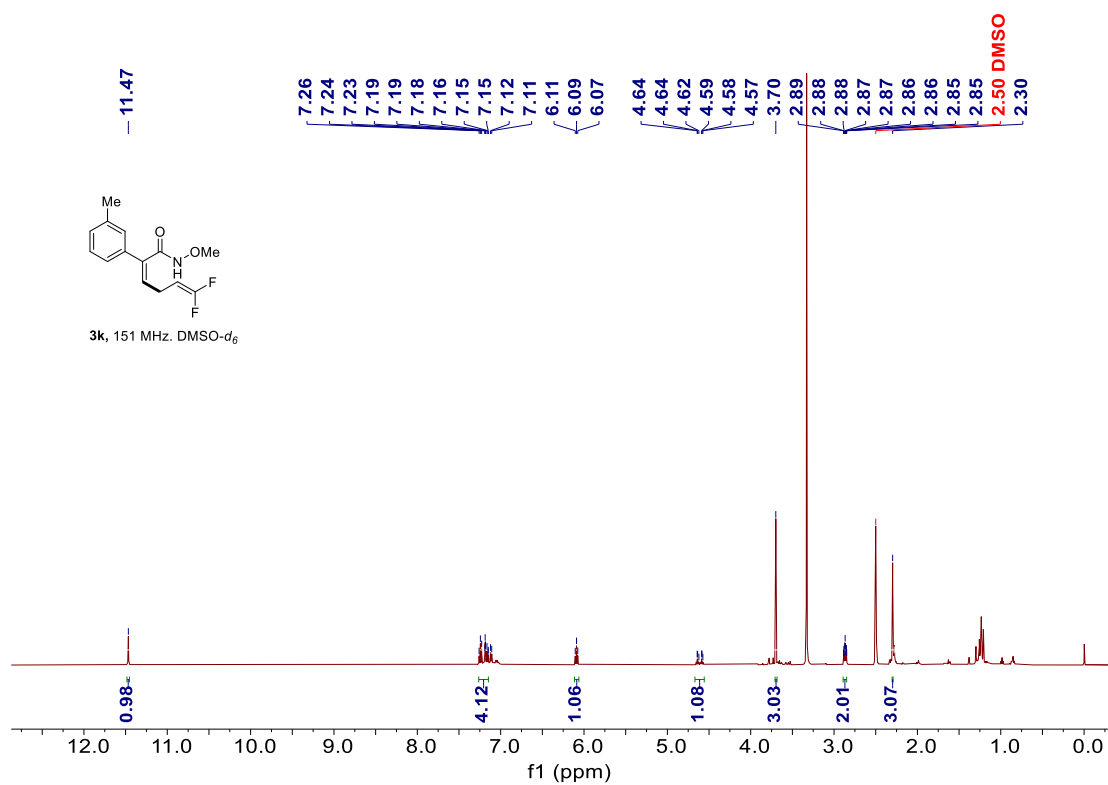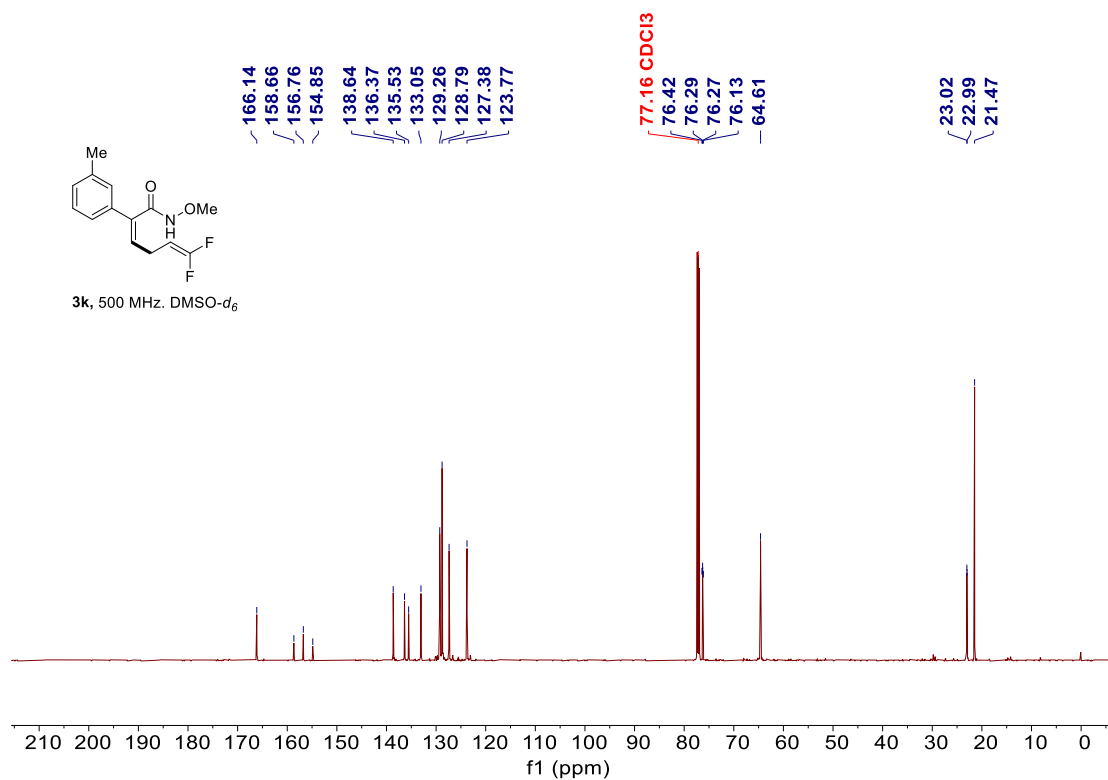

**<sup>19</sup>F NMR spectrum for product 3k**

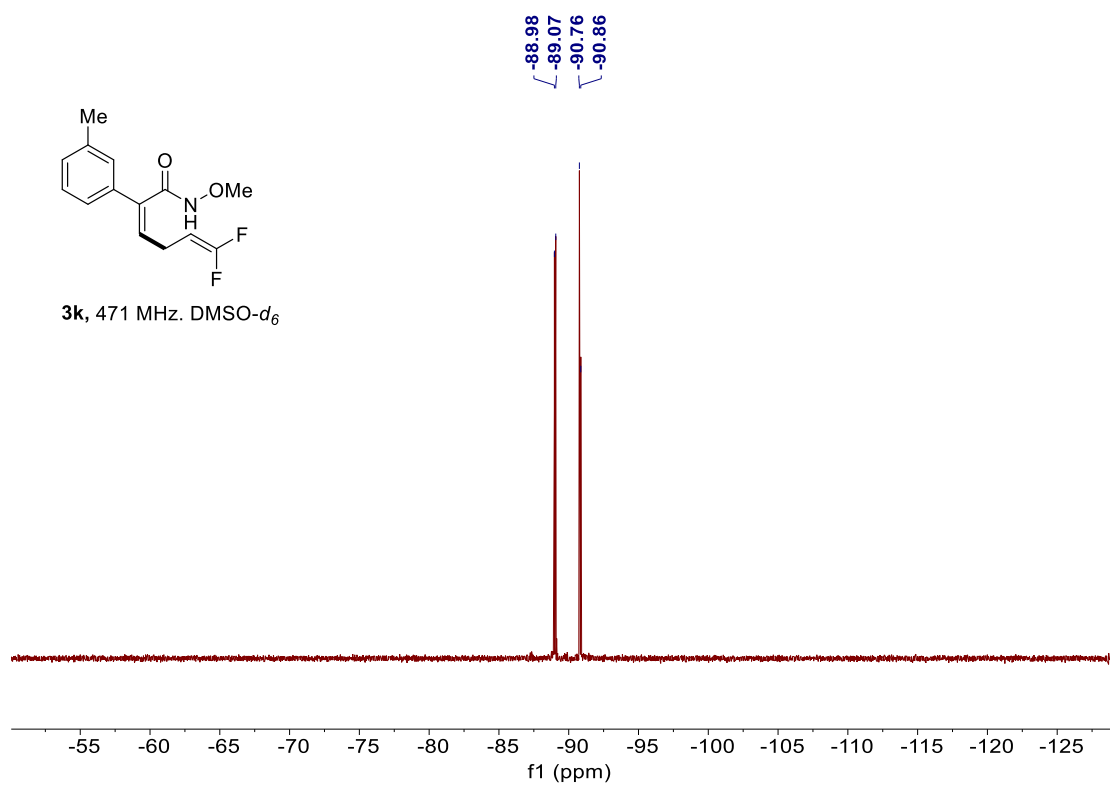



**(Z)-2-(3-bromophenyl)-6,6-difluoro-N-methoxyhexa-2,5-dienamide (3I)**

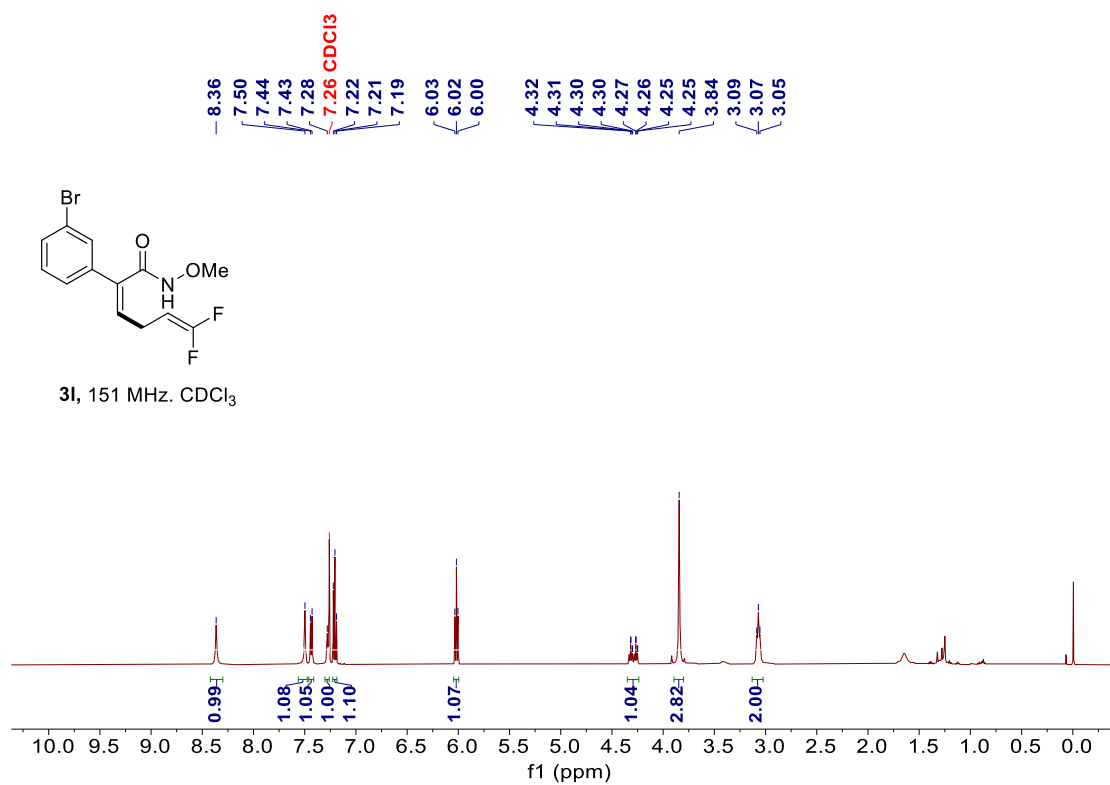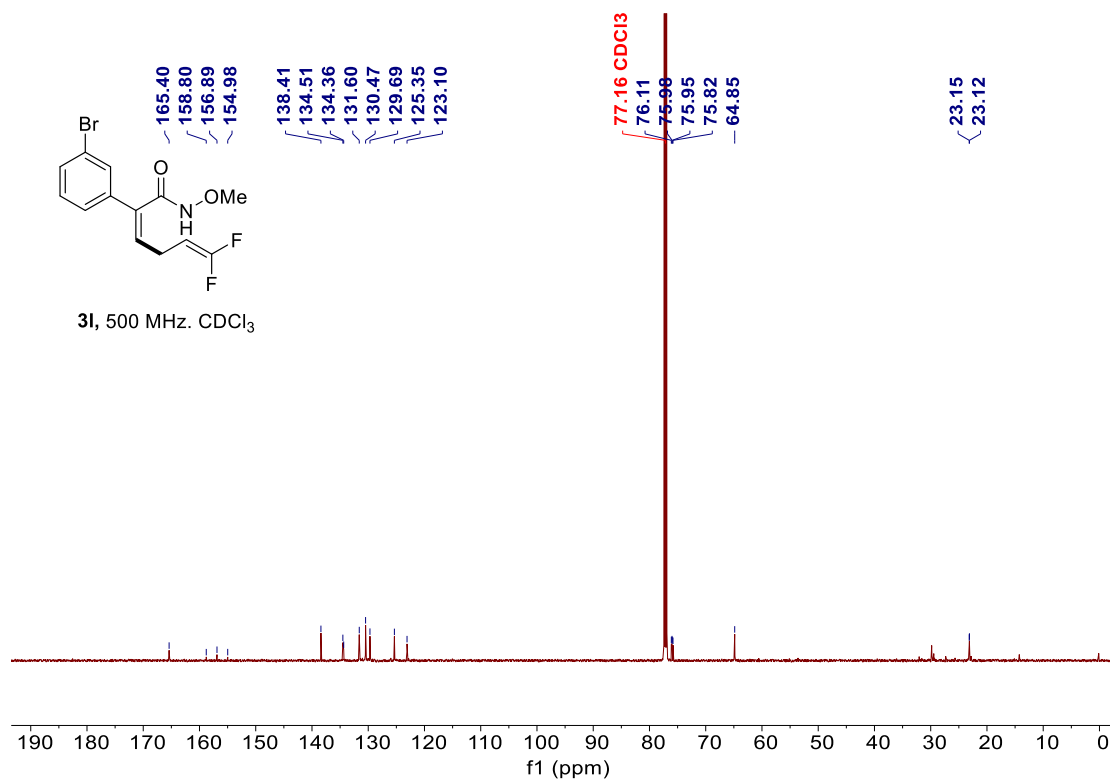

**<sup>19</sup>F NMR spectrum for product 3I**

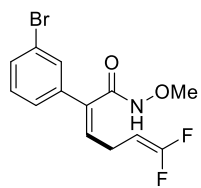

**3I**, 471 MHz. CDCl<sub>3</sub>

-87.24  
-87.33  
-89.27  
-89.36

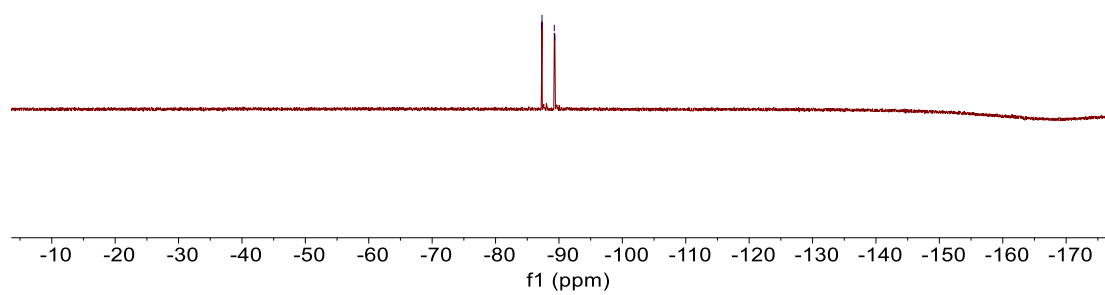

(Z)-2-(2-bromophenyl)-6,6-difluoro-N-methoxyhexa-2,5-dienamide (3m)

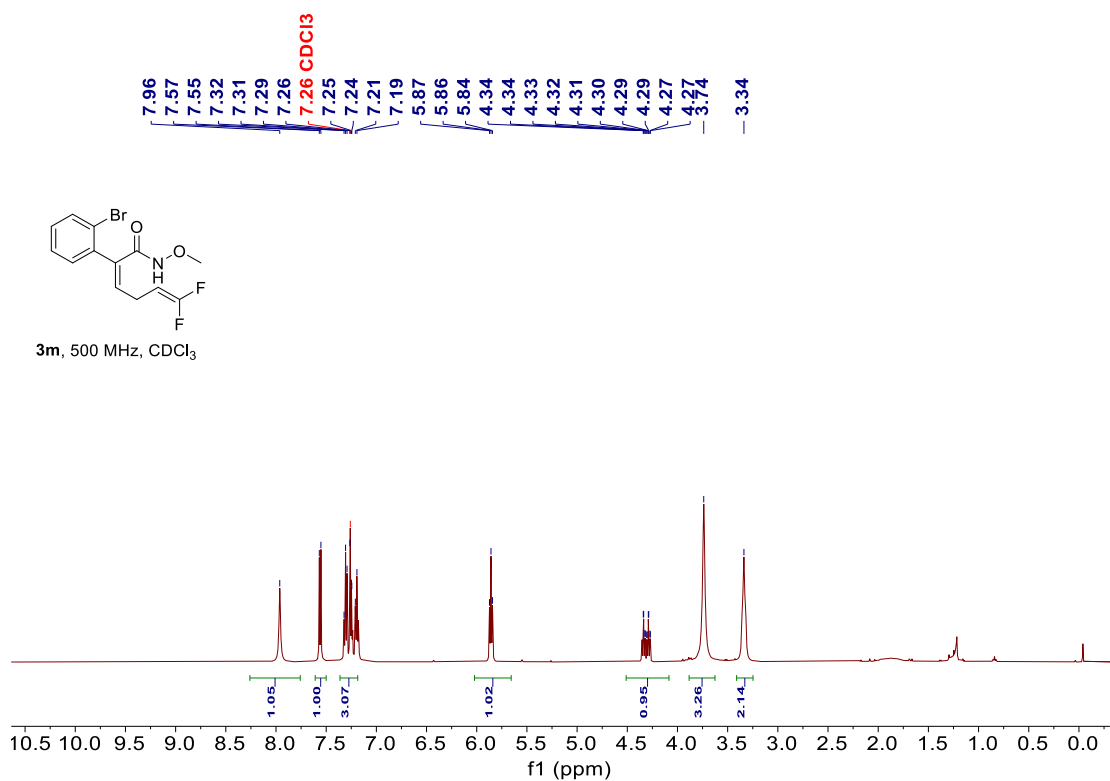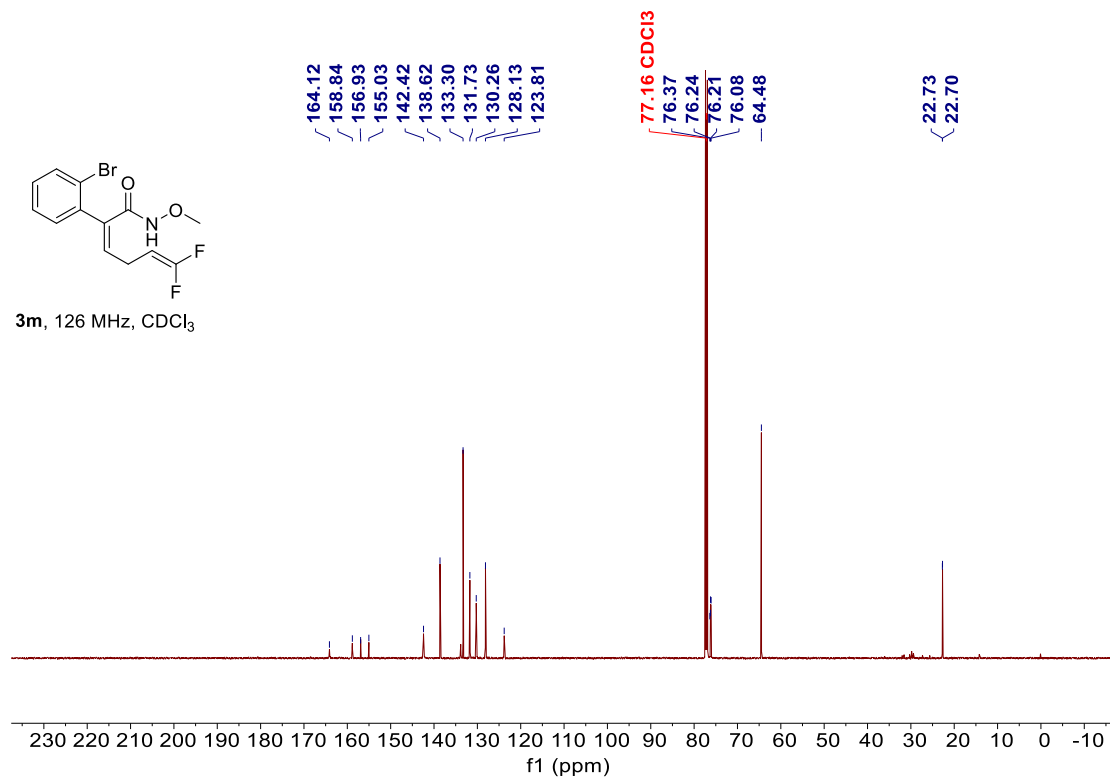

**<sup>19</sup>F NMR spectrum for product 3m**

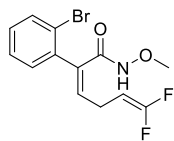

**3m**, 471 MHz, DMSO-*d*<sub>6</sub>

-92.65  
-92.74  
-94.47  
-94.57

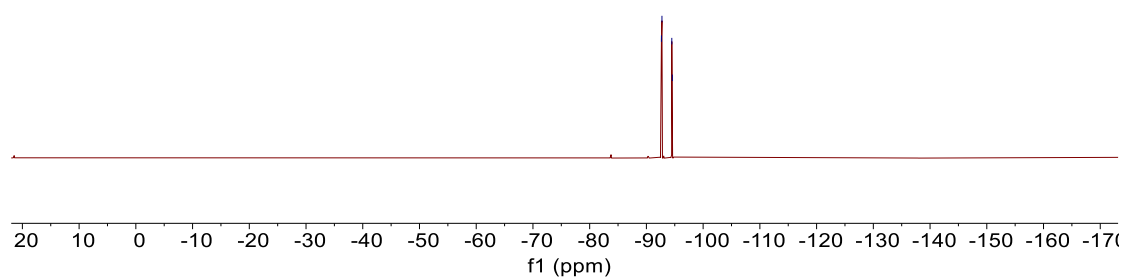

**(Z)-6,6-difluoro-N-methoxy-2-(2-methoxyphenyl)hexa-2,5-dienamide (3n)**

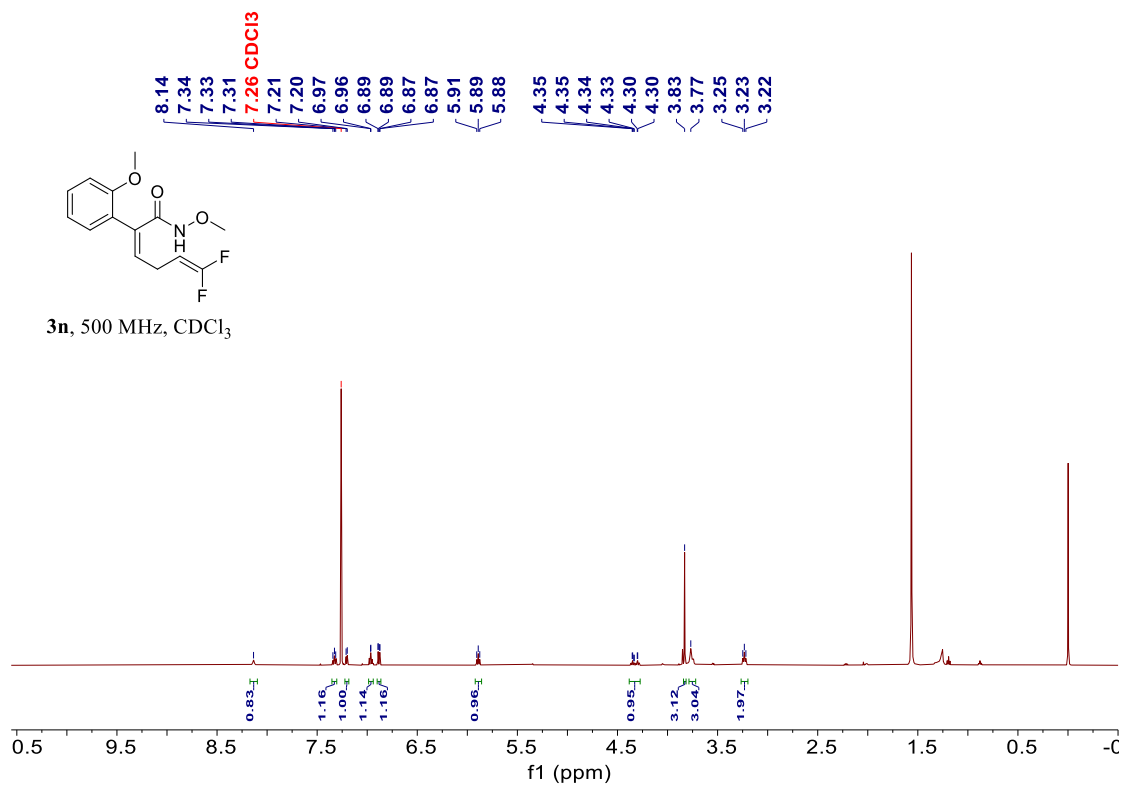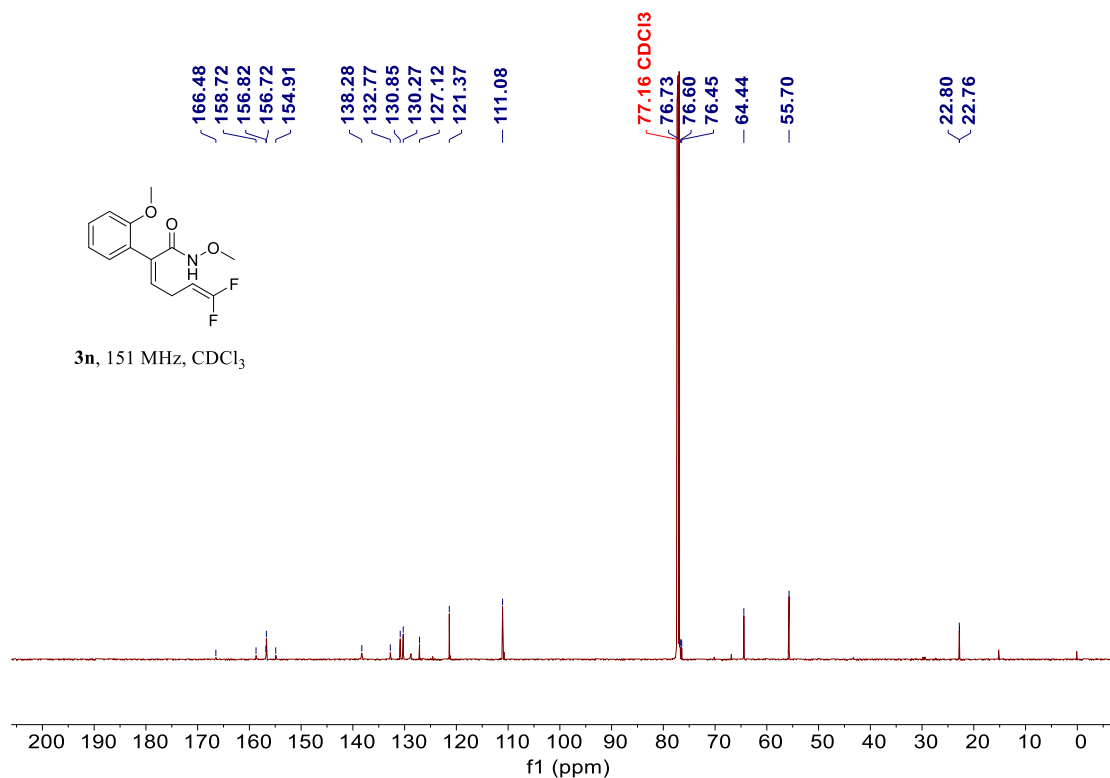

**<sup>19</sup>F NMR spectrum for product 3n**

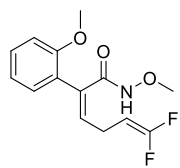

**3n**, 471 MHz, CDCl<sub>3</sub>

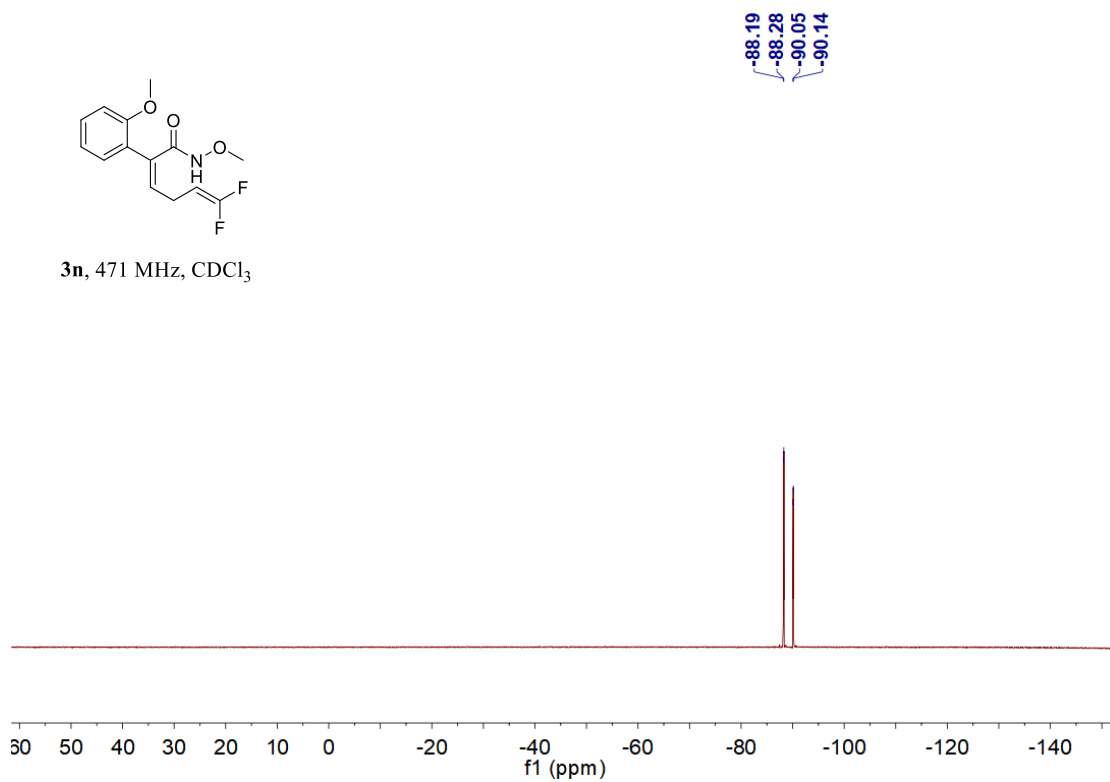

**(Z)-6,6-difluoro-2-(2-fluorophenyl)-N-methoxyhexa-2,5-dienamide (30)**

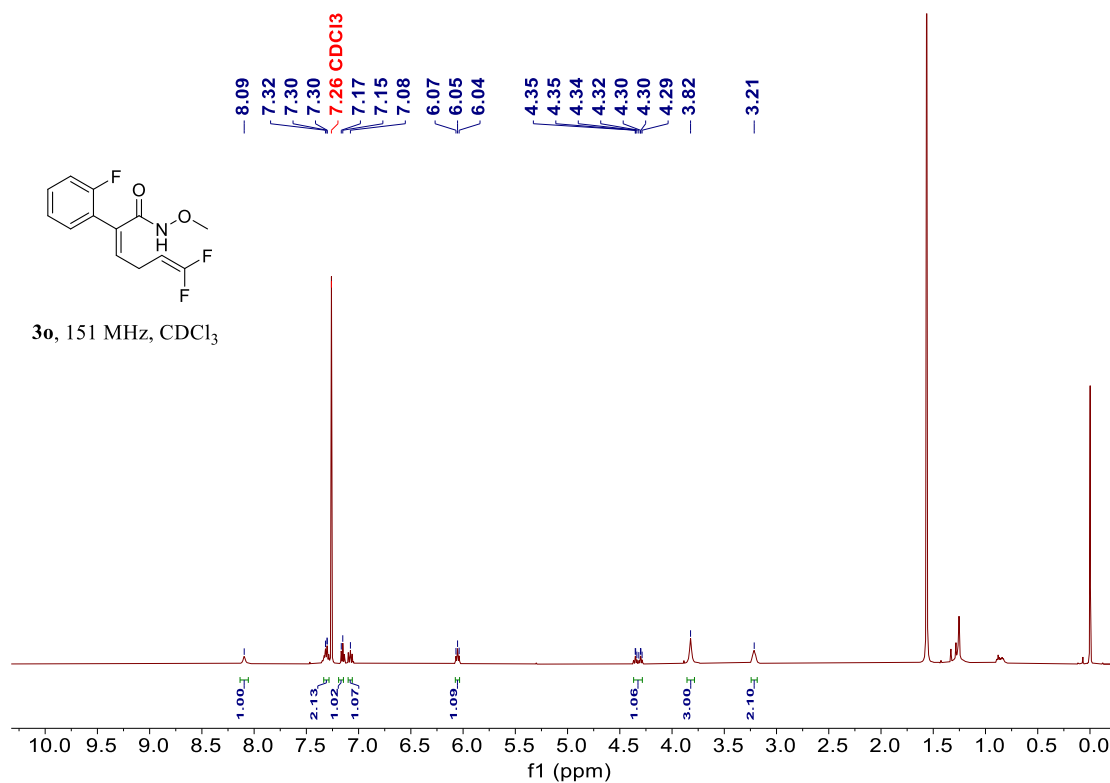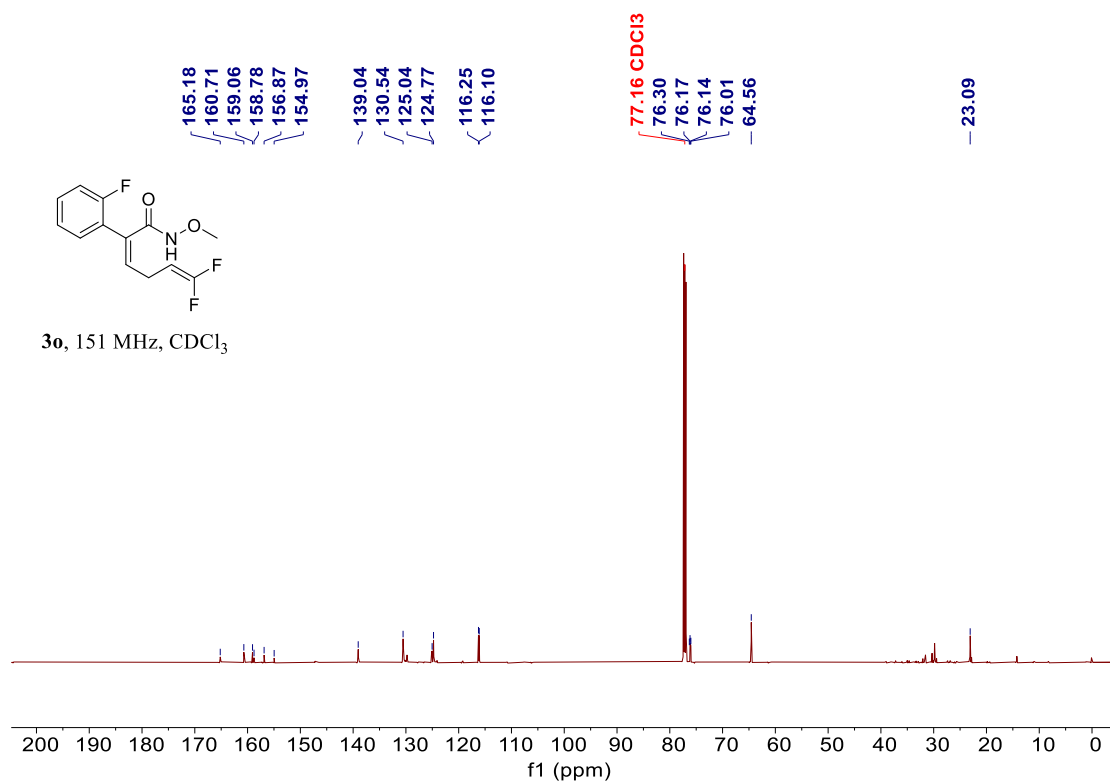

**<sup>19</sup>F NMR spectrum for product 3o**

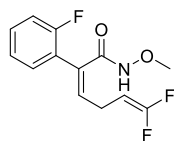

**3o**, 471 MHz, CDCl<sub>3</sub>

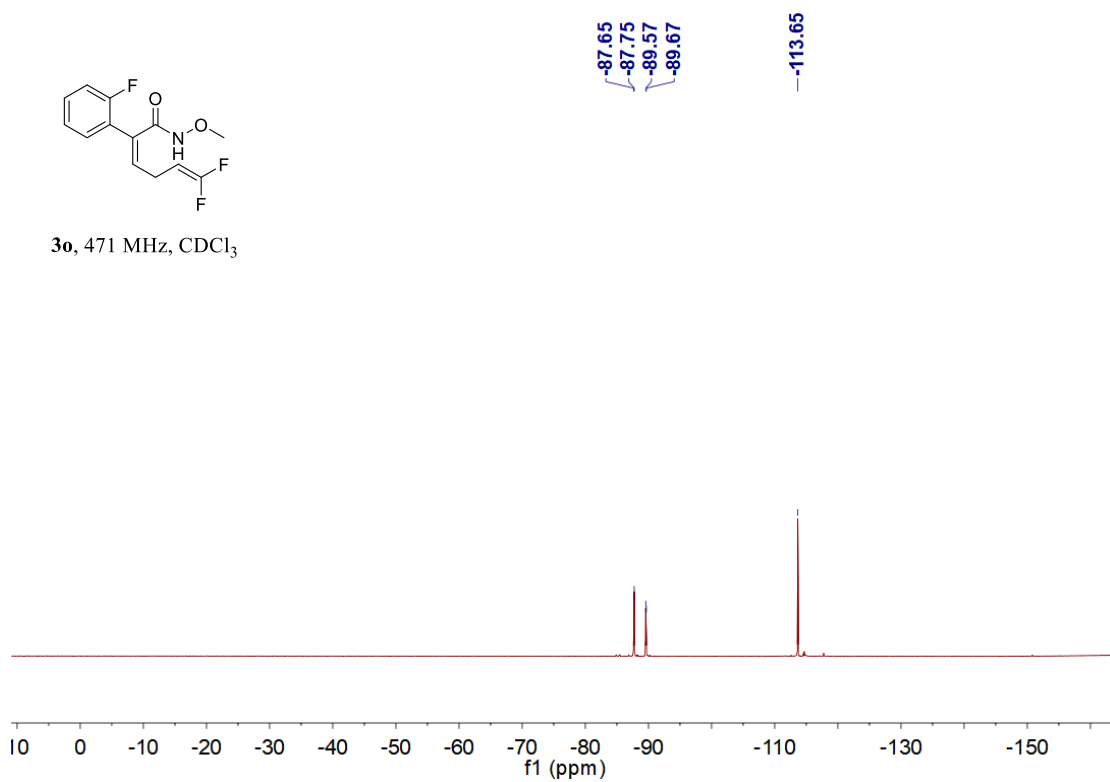



**(Z)-6,6-difluoro-N-methoxy-2-(o-tolyl)hexa-2,5-dienamide (3p)**

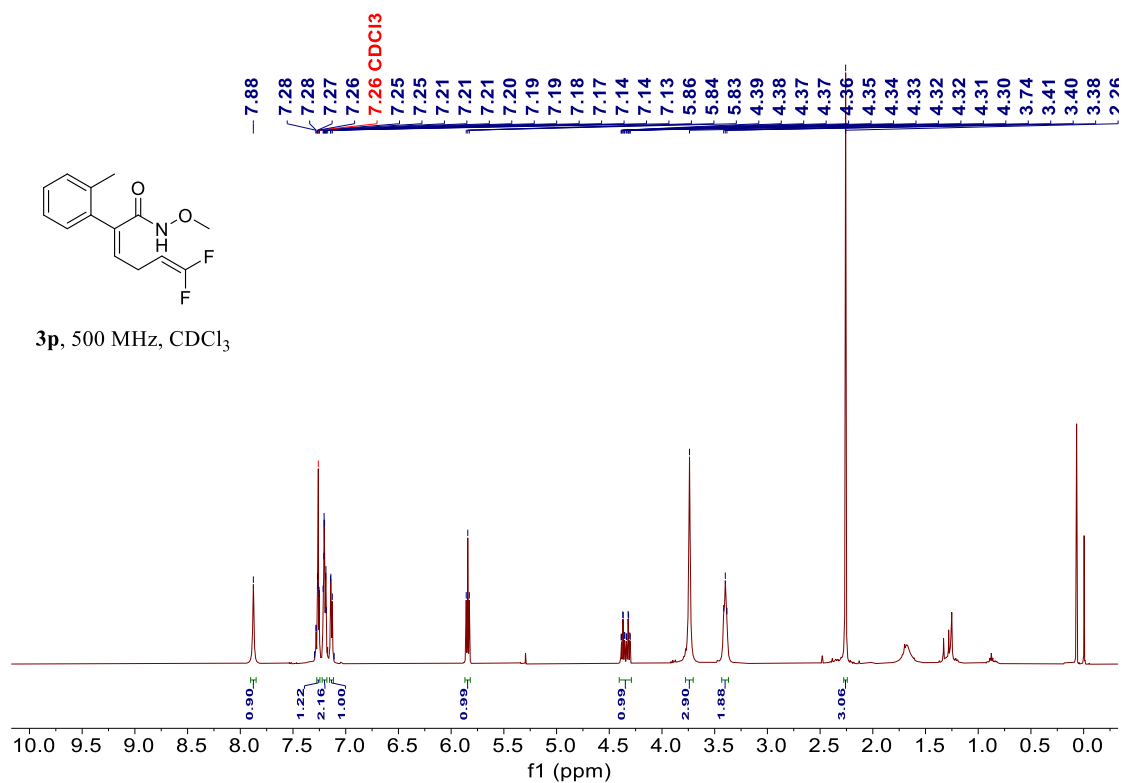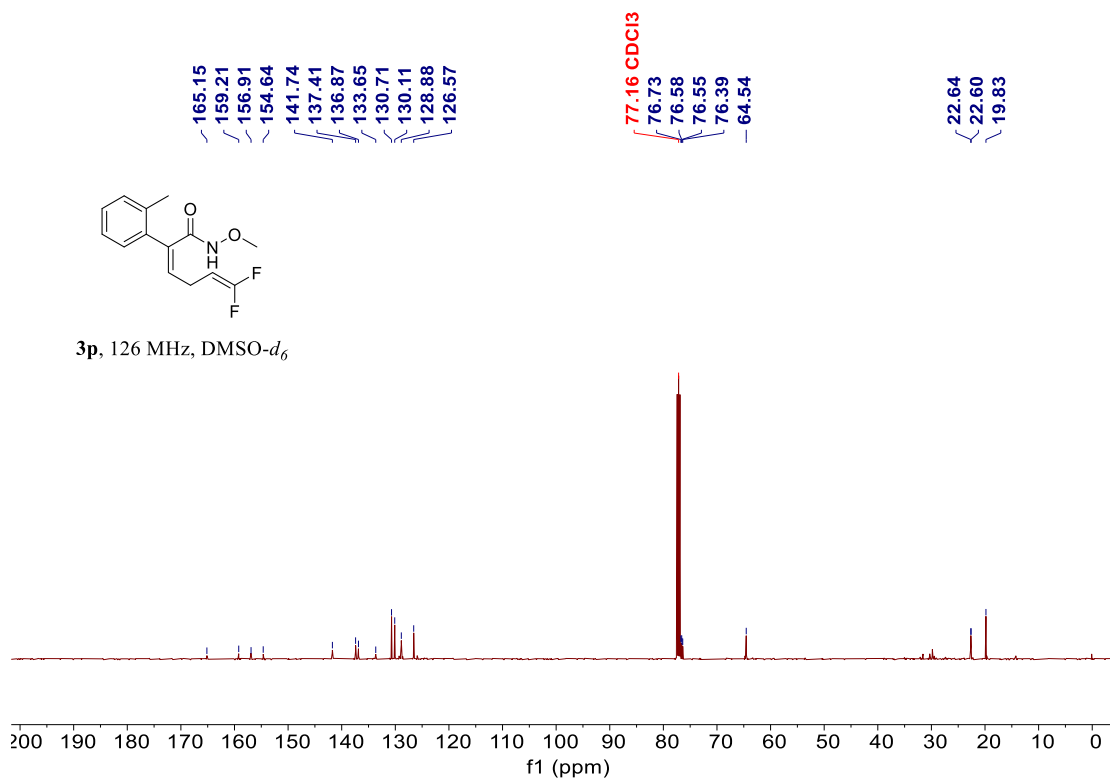

**<sup>19</sup>F NMR spectrum for product 3p**

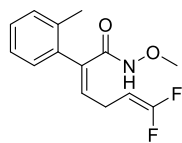

**3p**, 471 MHz, DMSO-*d*<sub>6</sub>

-88.21  
-88.31  
-90.04  
-90.14

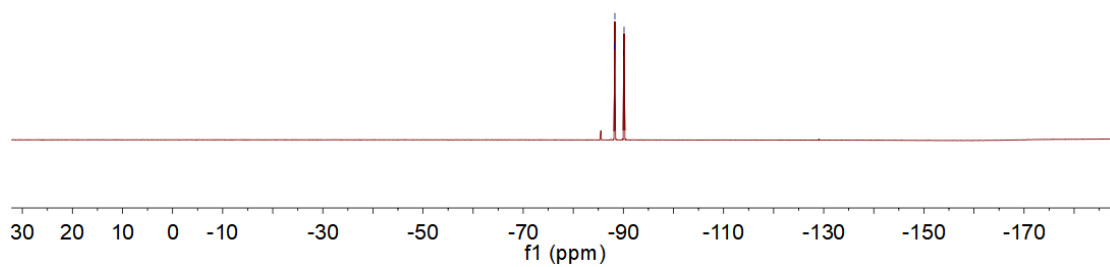

**(Z)-6,6-difluoro-N-methoxy-2-(naphthalen-1-yl)hexa-2,5-dienamide (3q)**

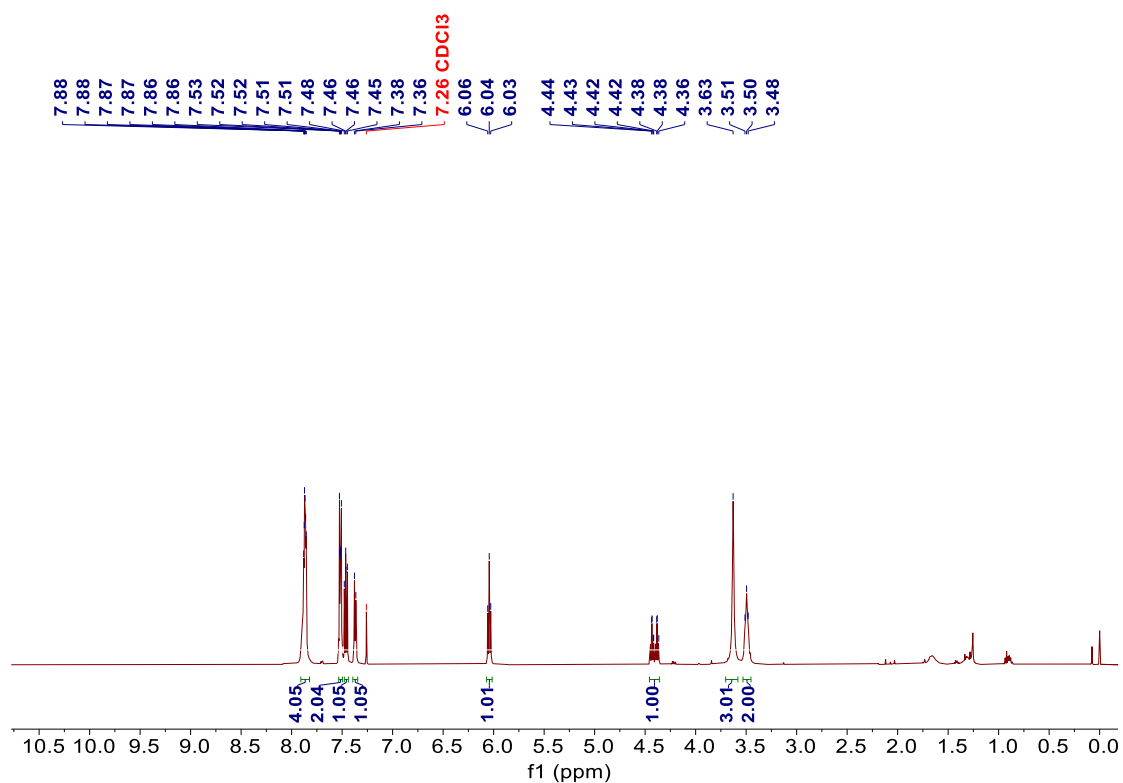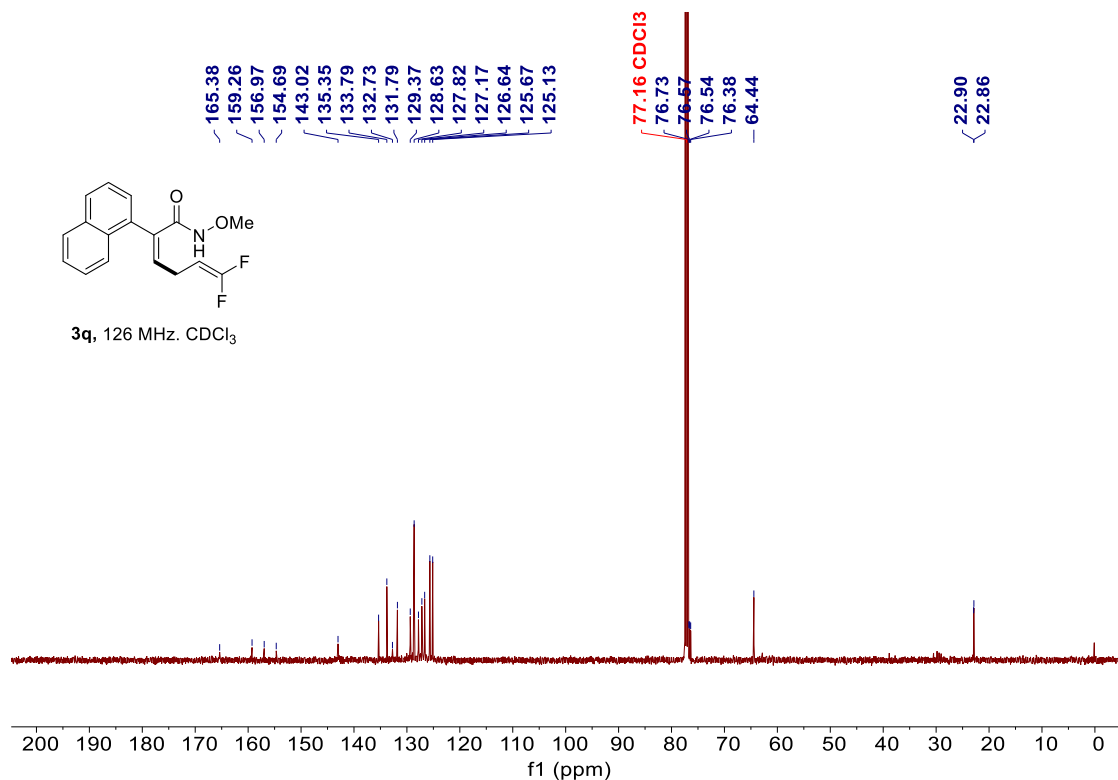

**<sup>19</sup>F NMR spectrum for product 3q**

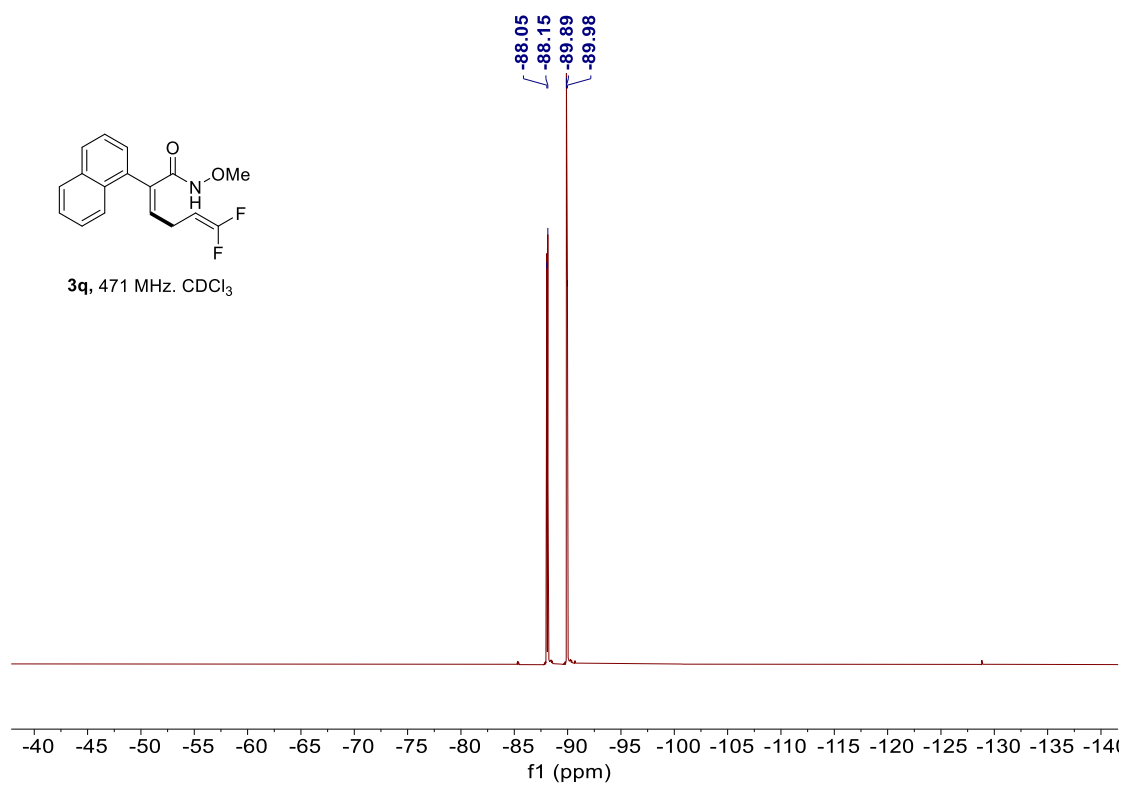

**(Z)-6,6-difluoro-N-methoxy-2-(naphthalen-2-yl)hexa-2,5-dienamide (3r)**

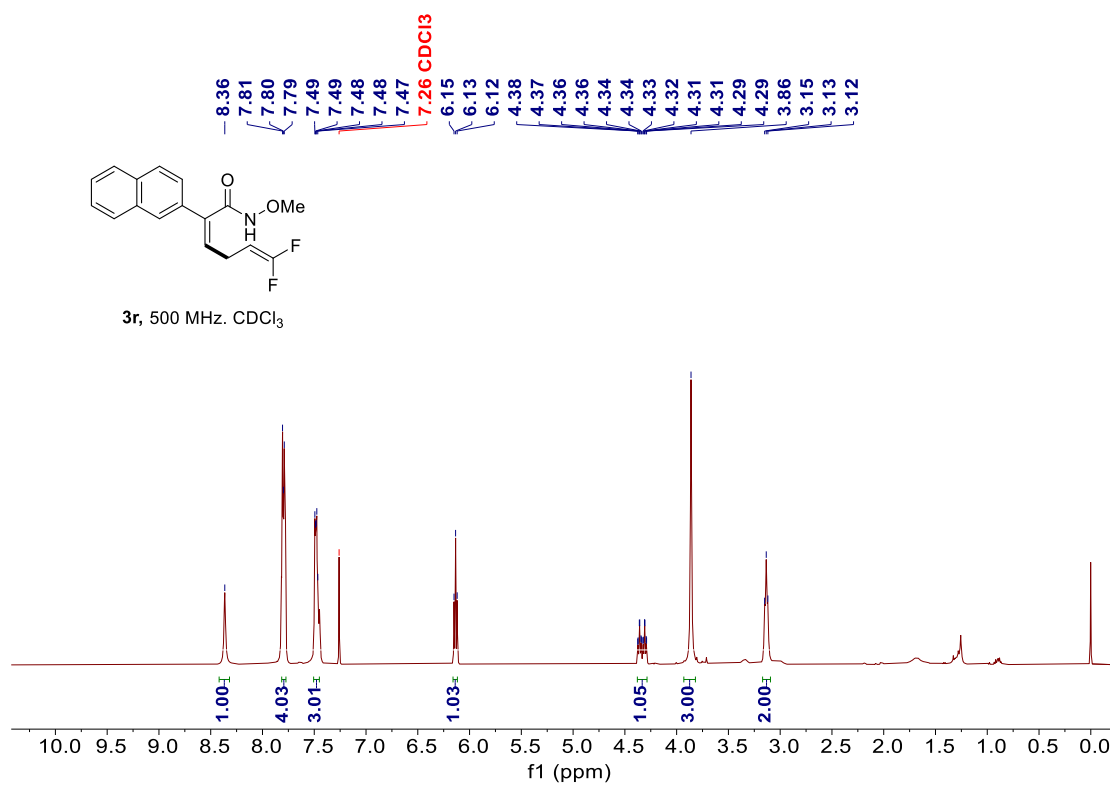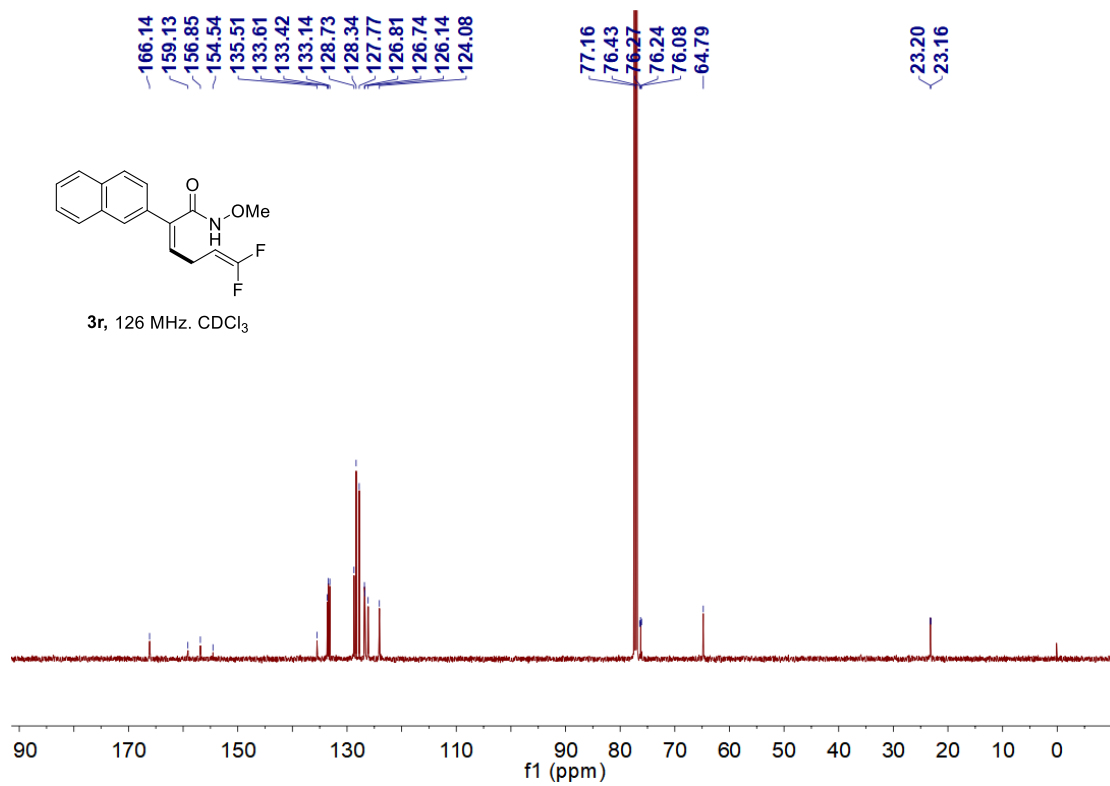

**<sup>19</sup>F NMR spectrum for product 3r**

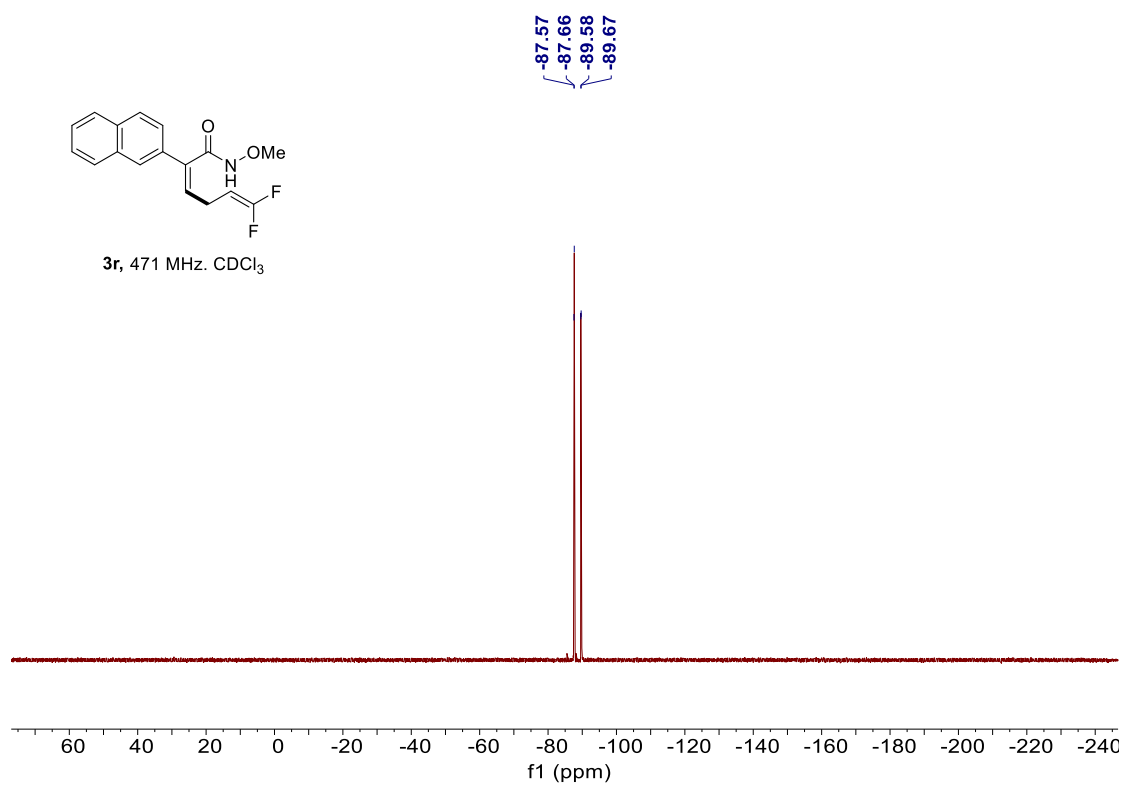

**(Z)-2-benzyl-6,6-difluoro-N-methoxyhexa-2,5-dienamide (3s)**

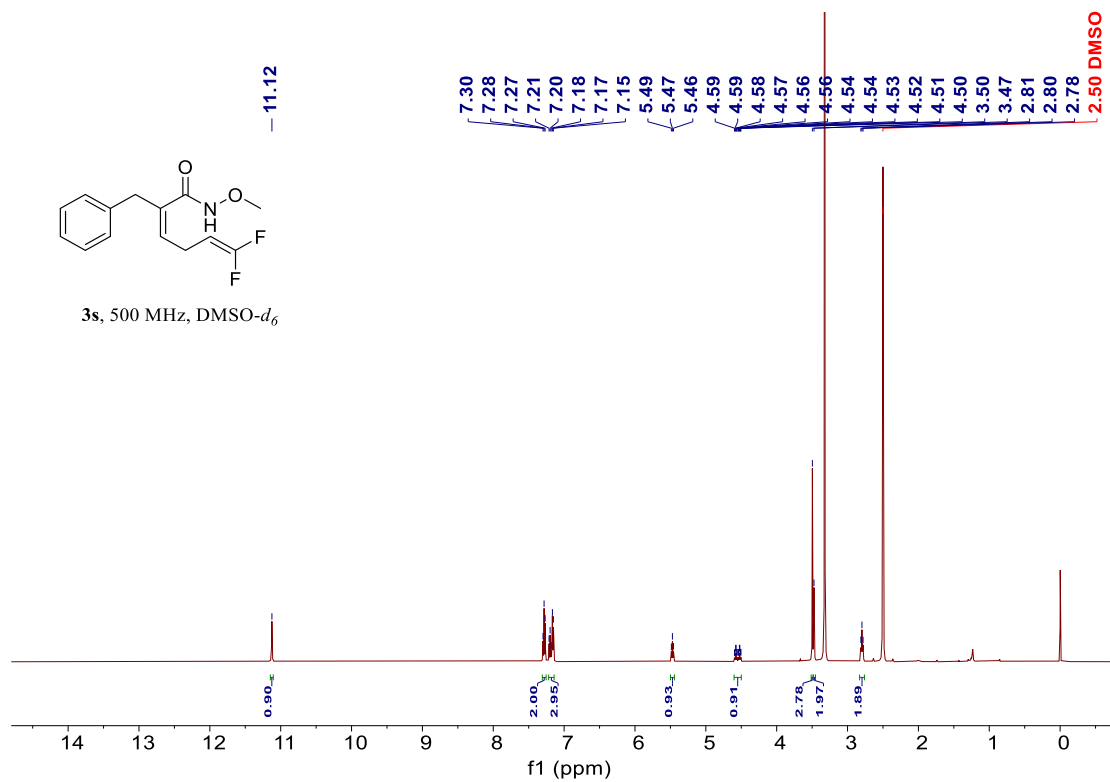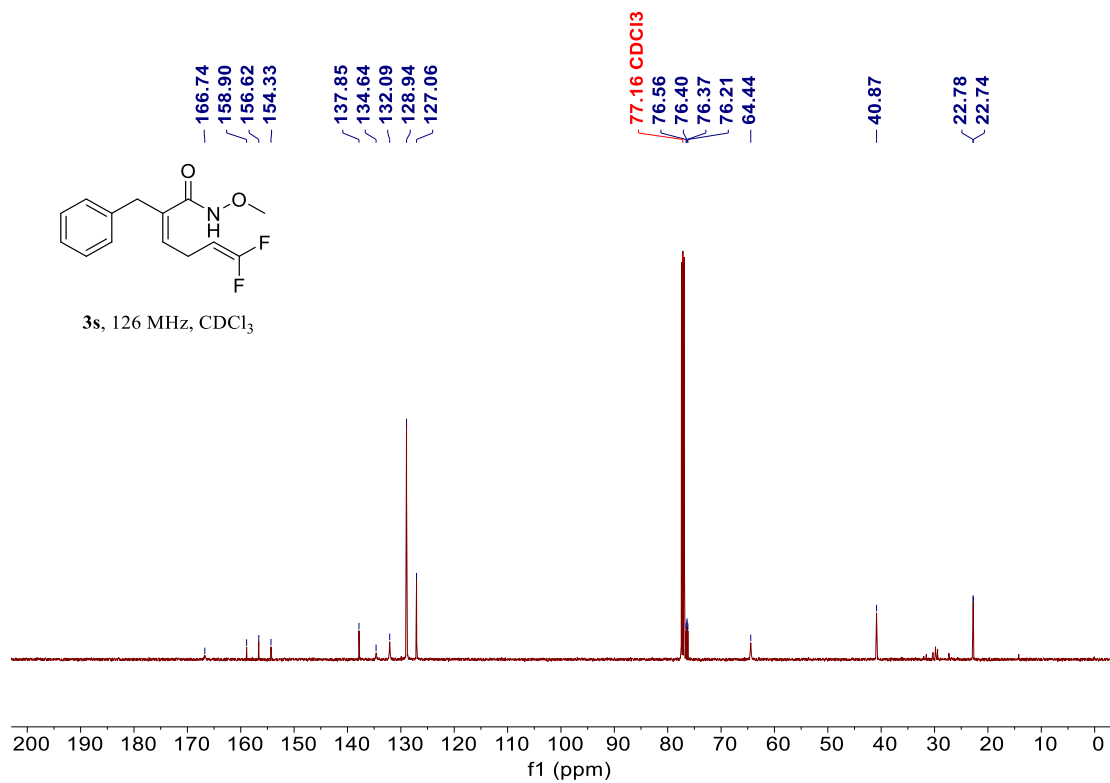

**<sup>19</sup>F NMR spectrum for product 3s**

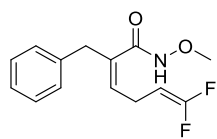

3s, 471 MHz, DMSO-*d*<sub>6</sub>

-89.28  
-89.38  
-91.17  
-91.27

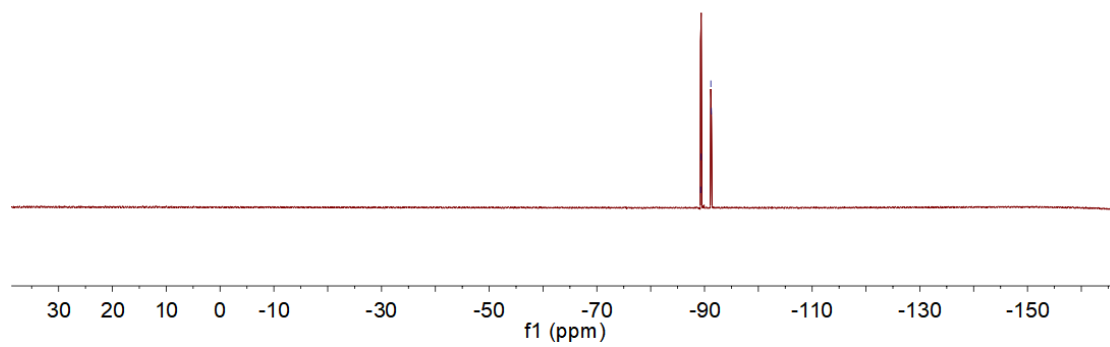



**(Z)-2-cyclohexyl-6,6-difluoro-N-methoxyhexa-2,5-dienamide (3t)**

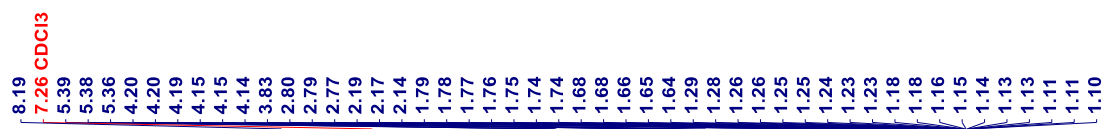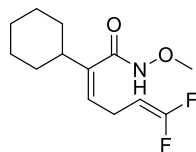

**3t**, 500 MHz, CDCl<sub>3</sub>

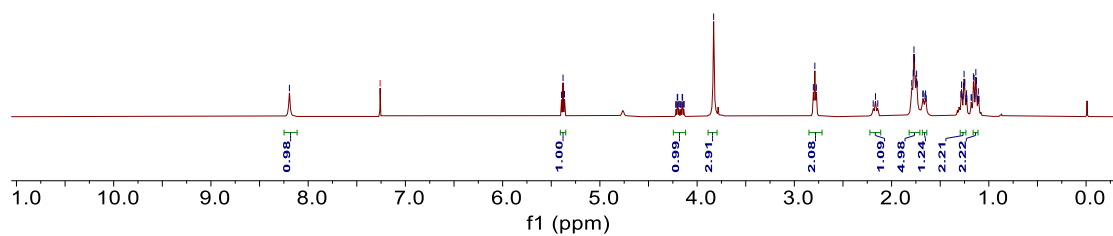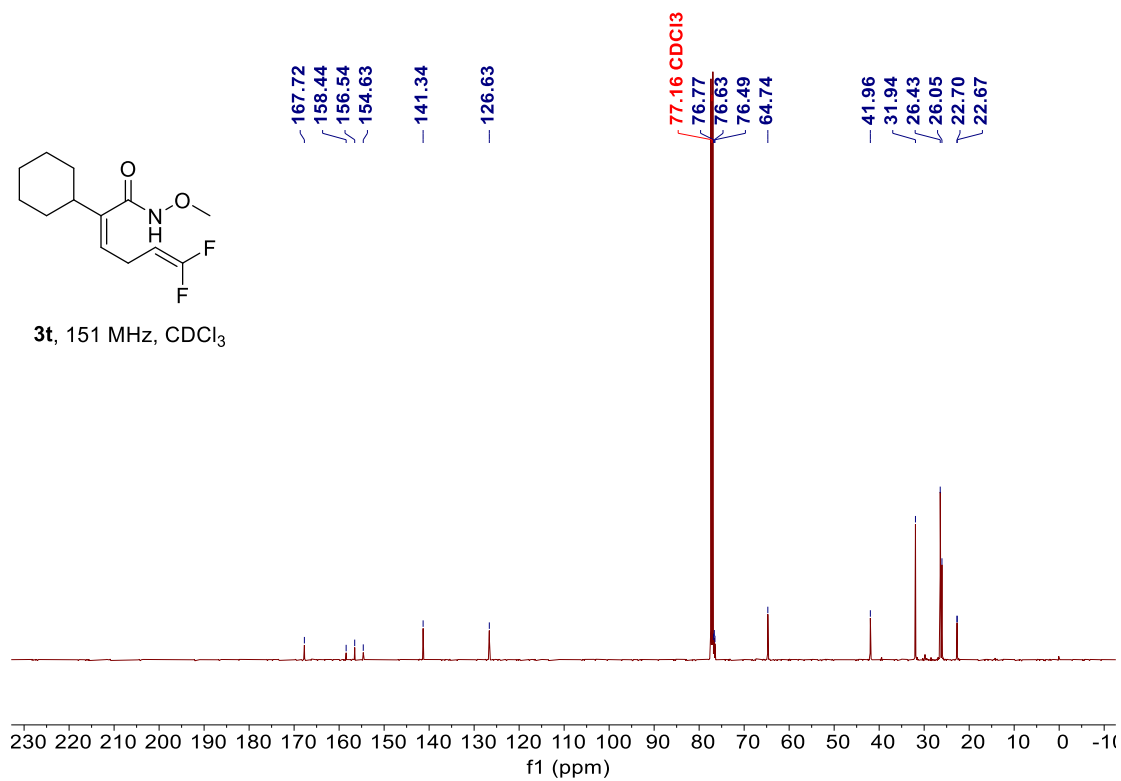

**<sup>19</sup>F NMR spectrum for product 3t**

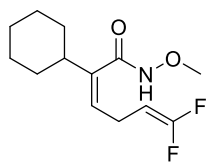

**3t**, 471 MHz, CDCl<sub>3</sub>

-88.04  
-88.14  
-89.99  
-90.08

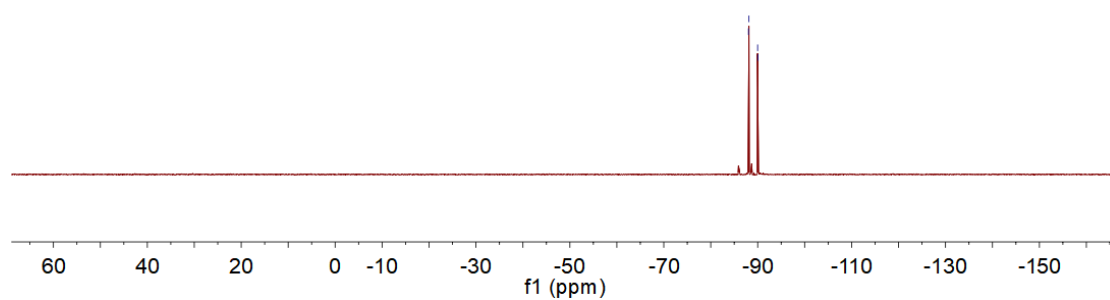

**2-(3,3-difluoroallyl)-*N*-methoxycyclopent-1-ene-1-carboxamide (3u)**

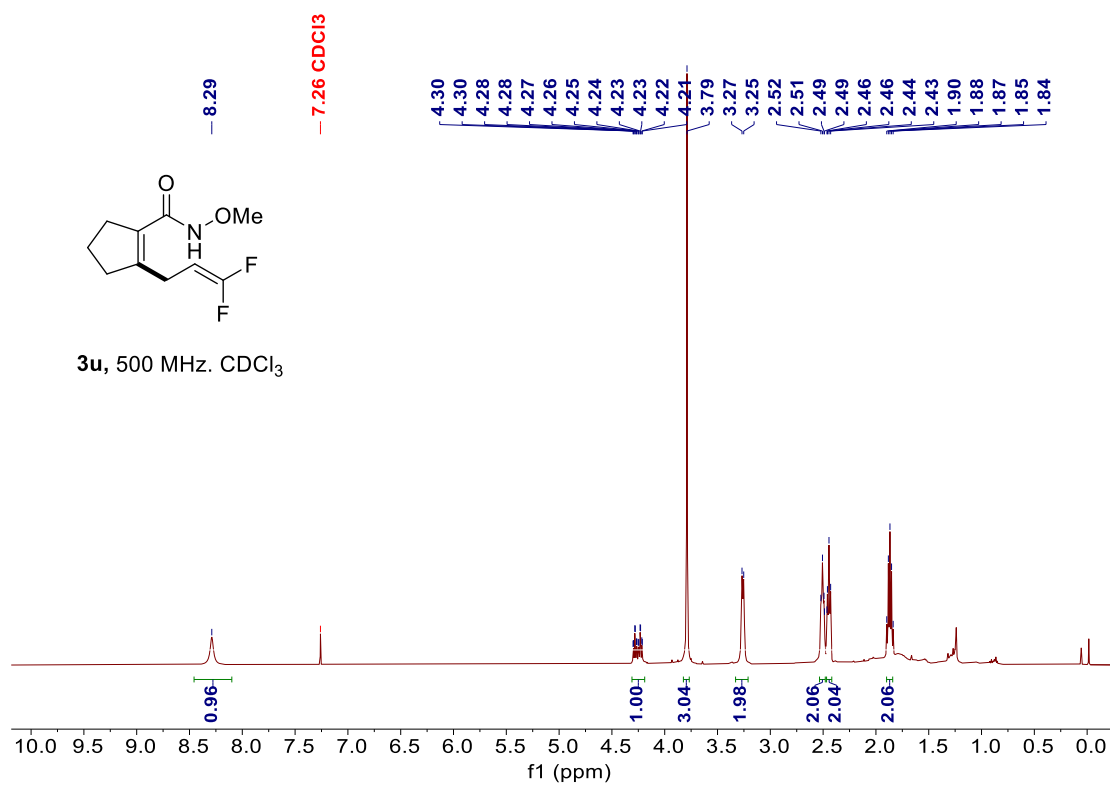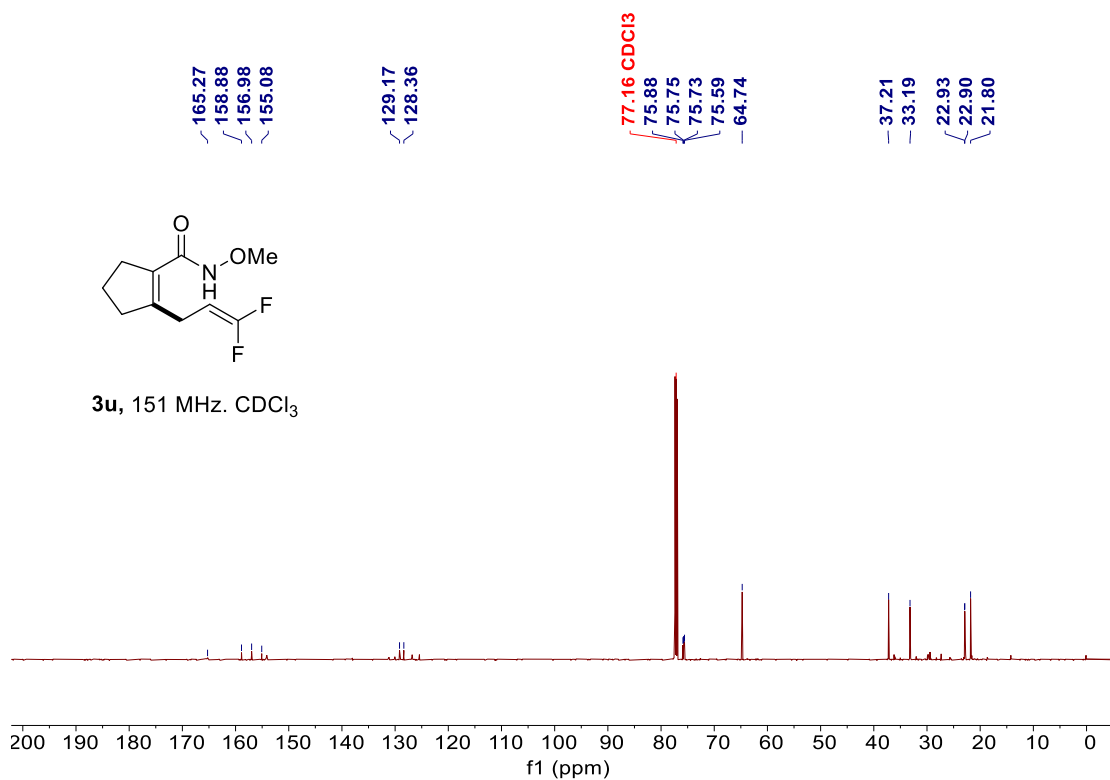

**<sup>19</sup>F NMR spectrum for product 3u**

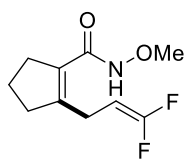

**3u**, 565 MHz, CDCl<sub>3</sub>

-88.40  
-88.48  
-90.81  
-90.86  
-90.89  
-90.94

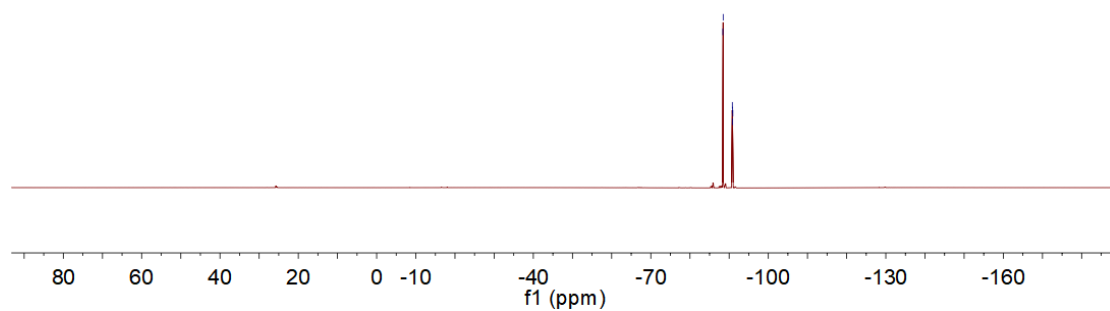

**(Z)-6,6-difluoro-N-methoxy-2-phenethylhexa-2,5-dienamide (3v)**

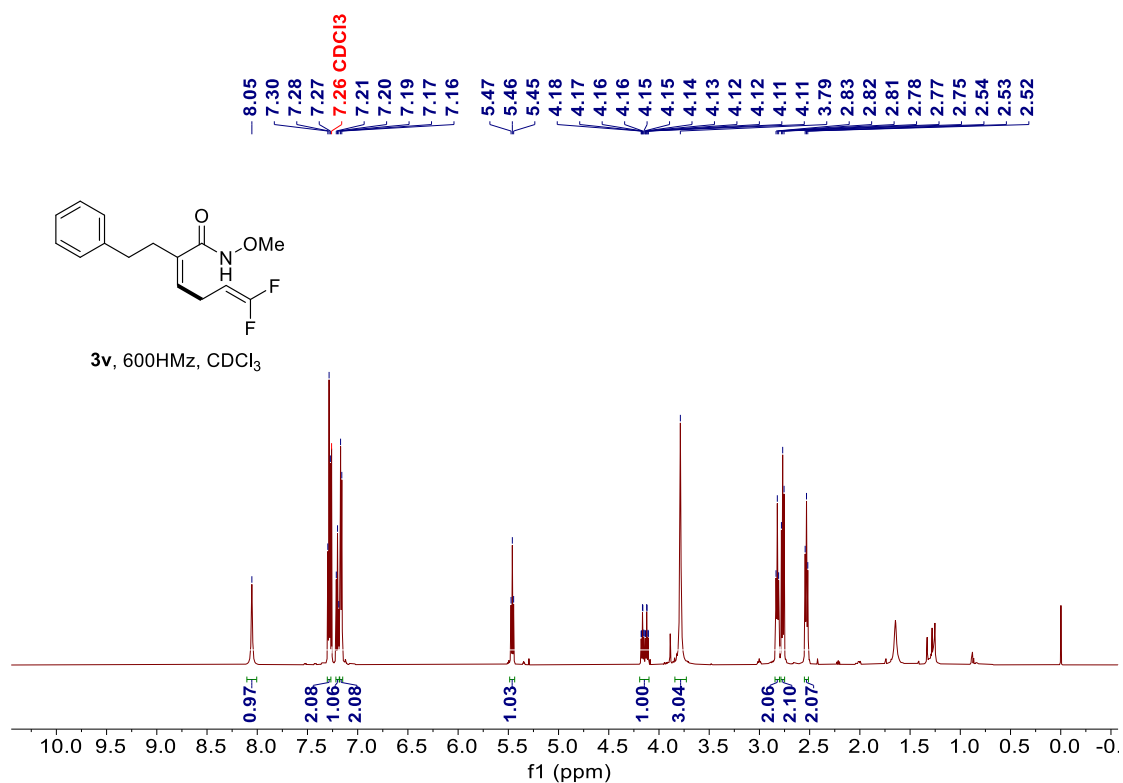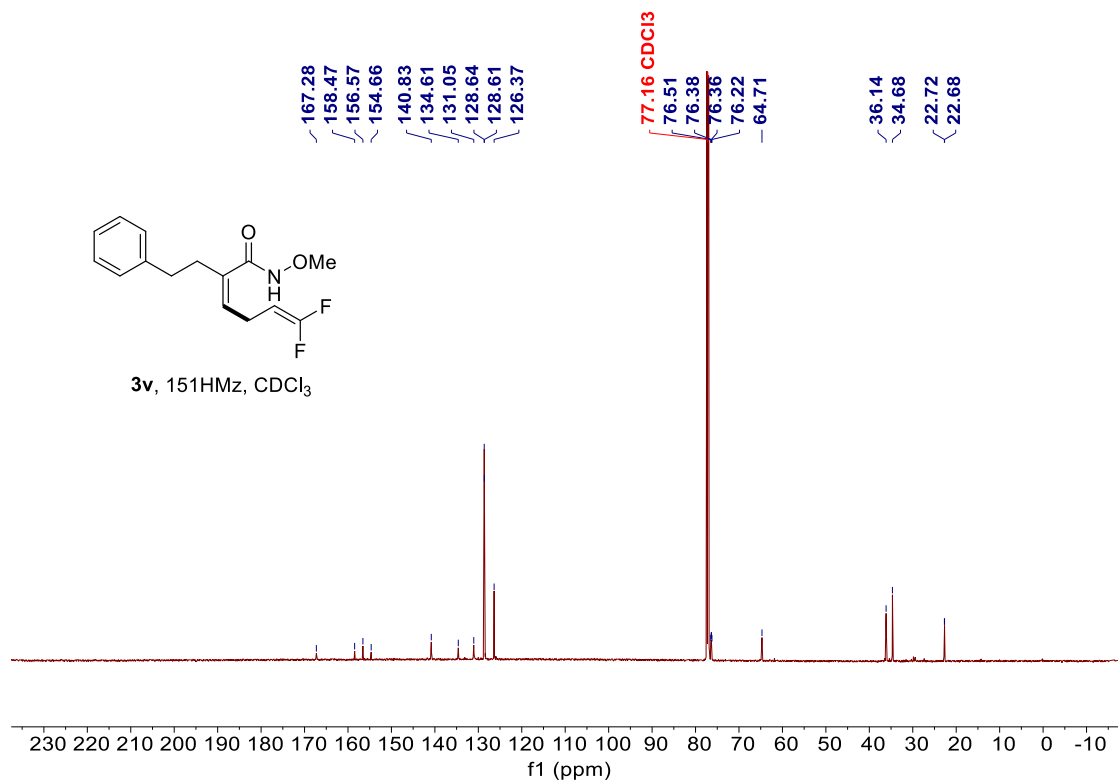

**<sup>19</sup>F NMR spectrum for product 3v**

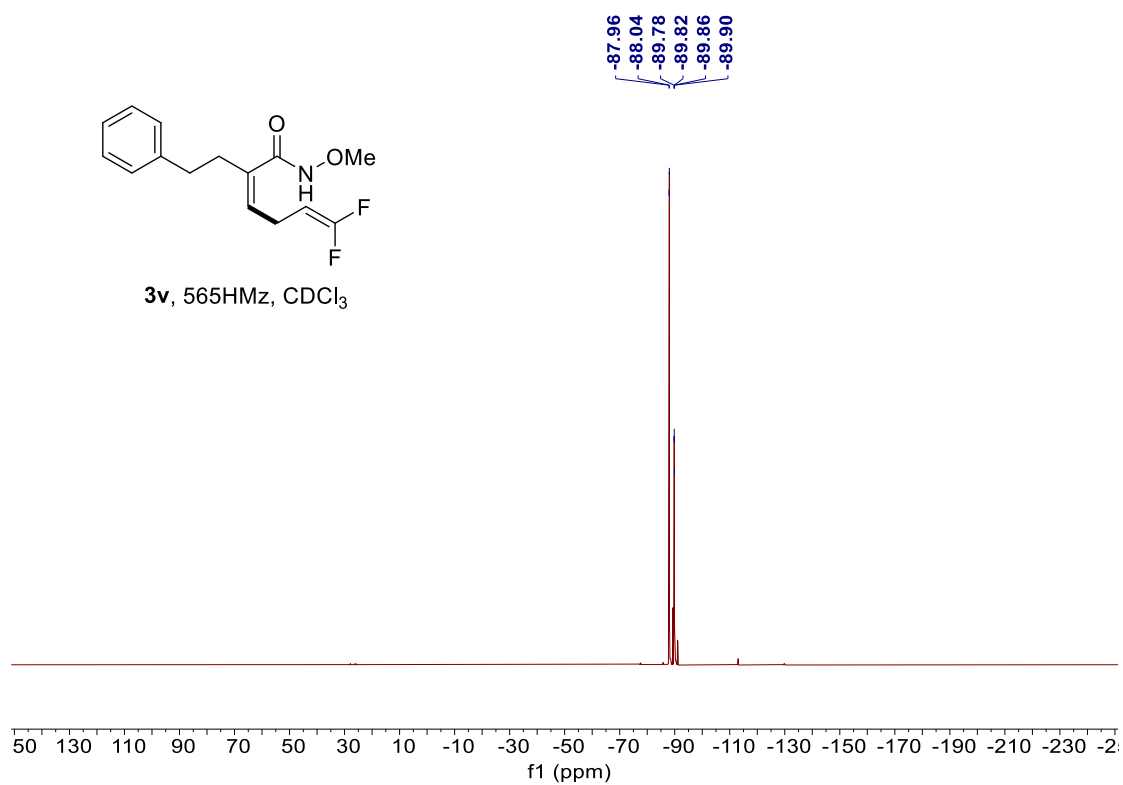

**(Z)-6,6-difluoro-N-methoxy-2-propylhexa-2,5-dienamide (3w)**

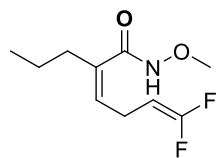

**3w**, 600 MHz, CDCl<sub>3</sub>

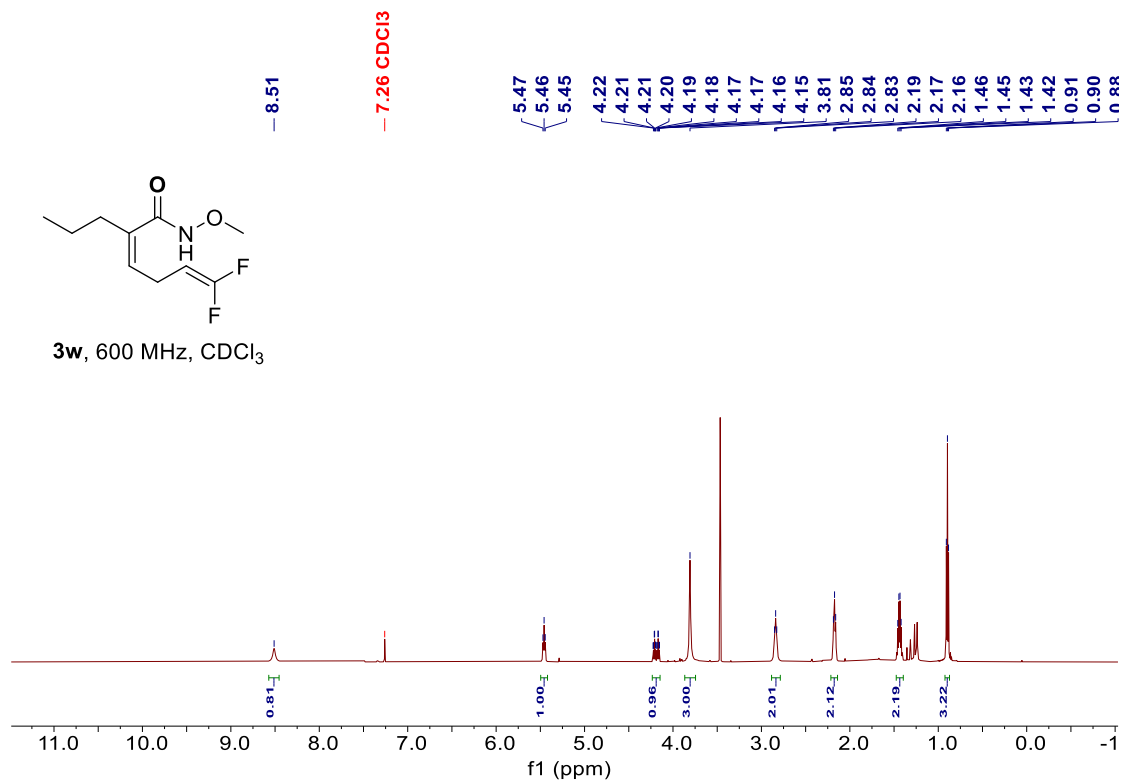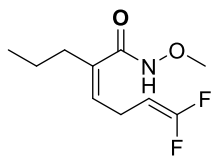

**3w**, 151 MHz, CDCl<sub>3</sub>

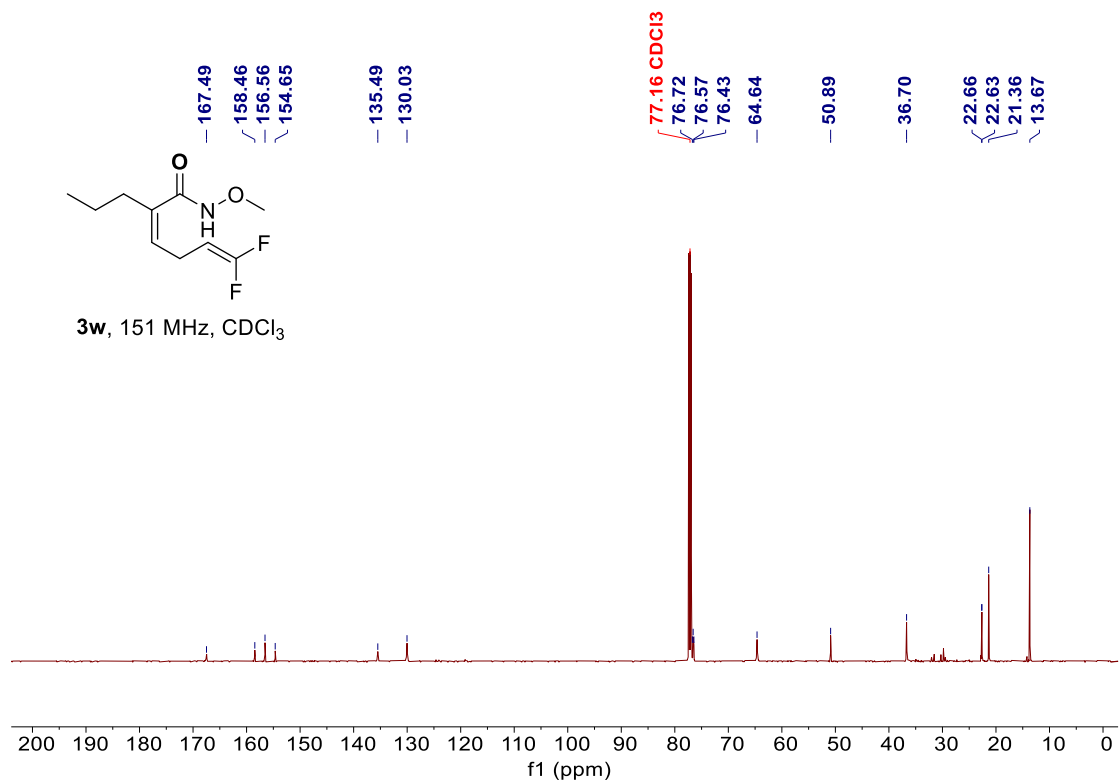

**<sup>19</sup>F NMR spectrum for product 3w**

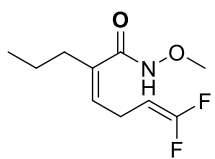

**3w**, 565 MHz, CDCl<sub>3</sub>

-88.19  
-88.27  
-90.09  
-90.14  
-90.17  
-90.22

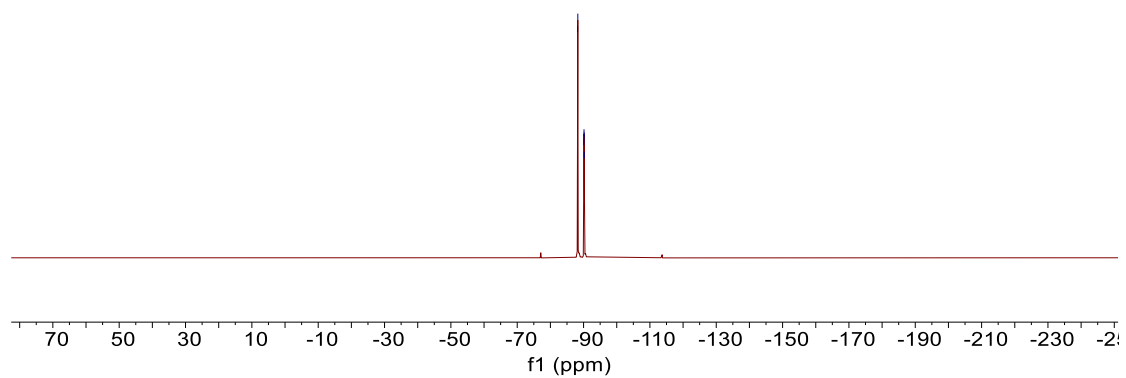



(Z)-N-methoxy-2-phenylhexa-2,5-dienamide (3x)

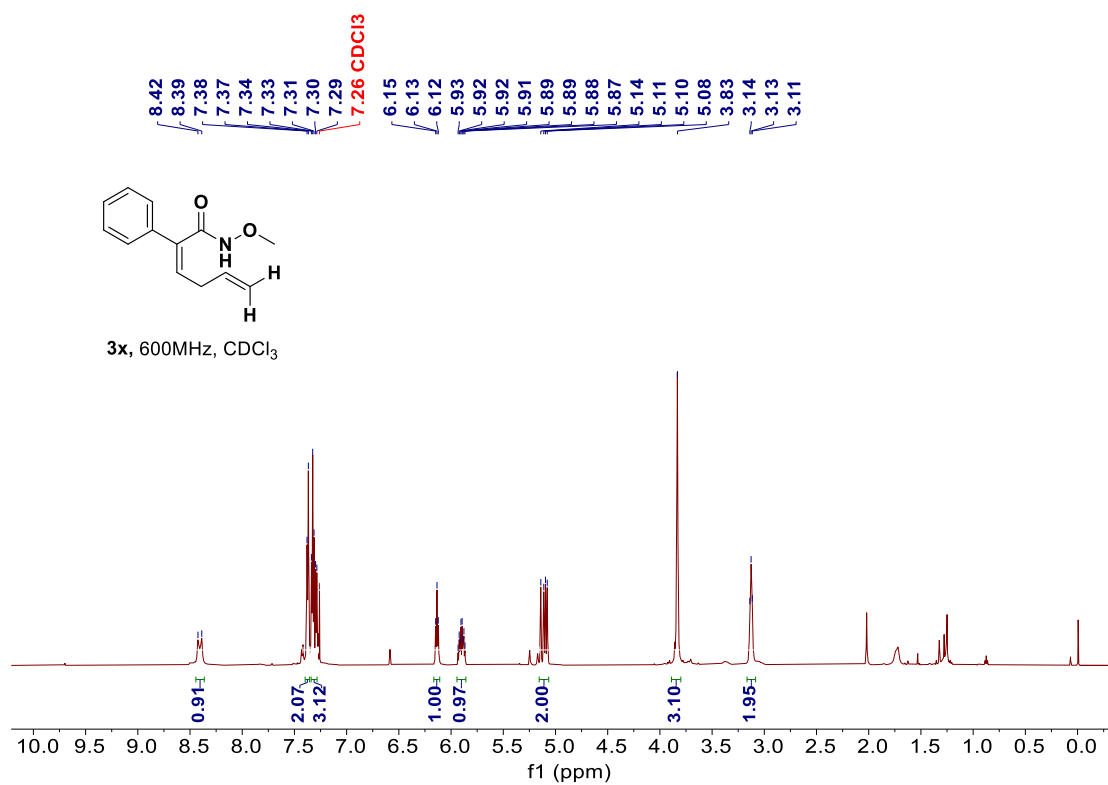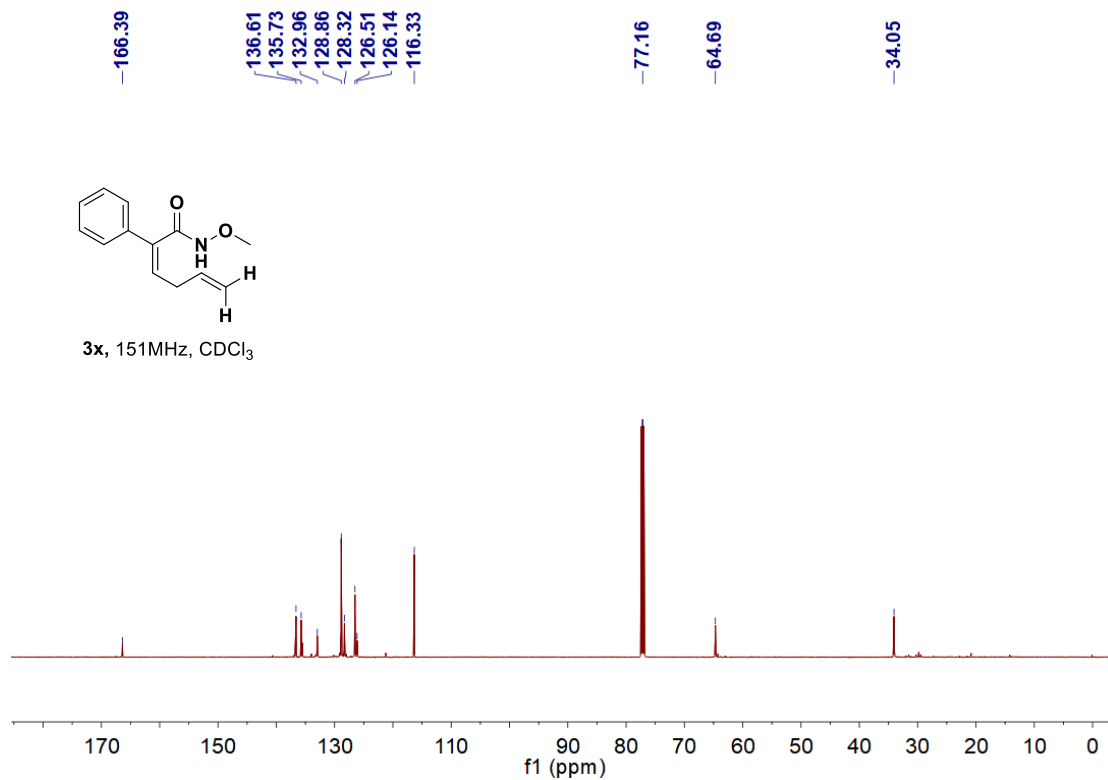

## 2-(3,3-difluoroallyl)-N-methoxybenzamide (5a)

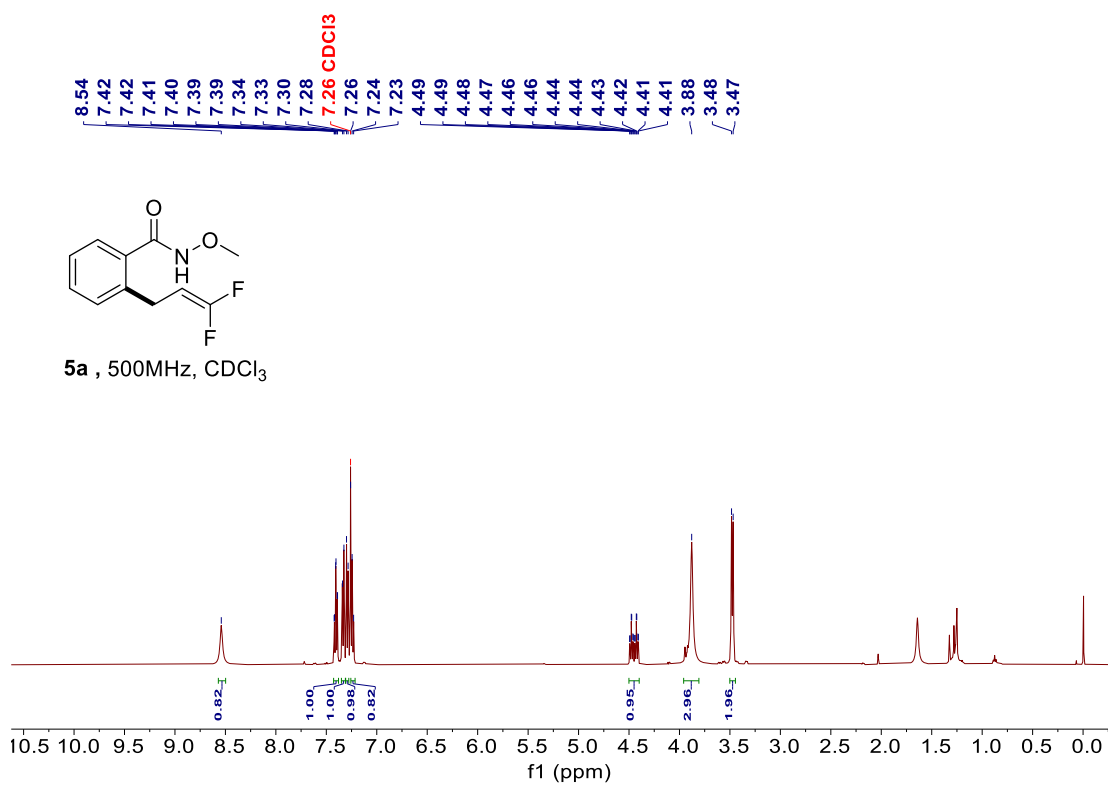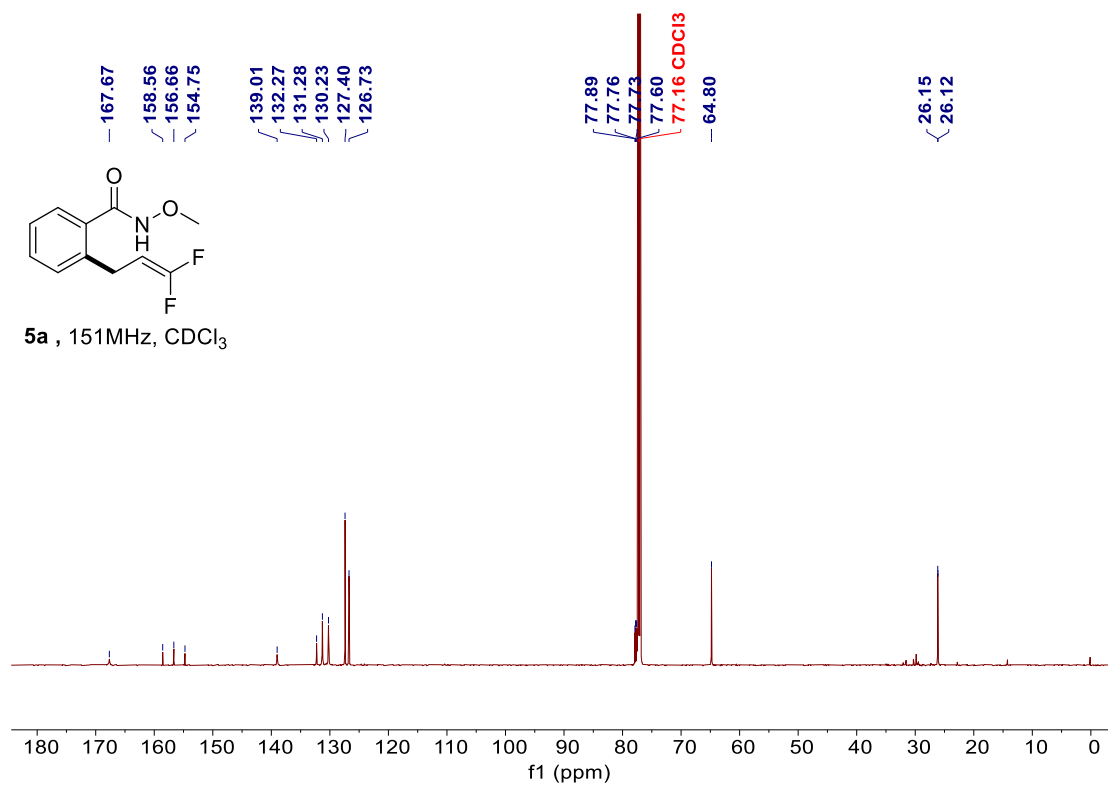

**<sup>19</sup>F NMR spectrum for product 5a**

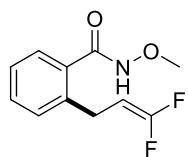

**5a** , 471MHz, CDCl<sub>3</sub>

-88.37  
-88.47  
-90.76  
-90.86

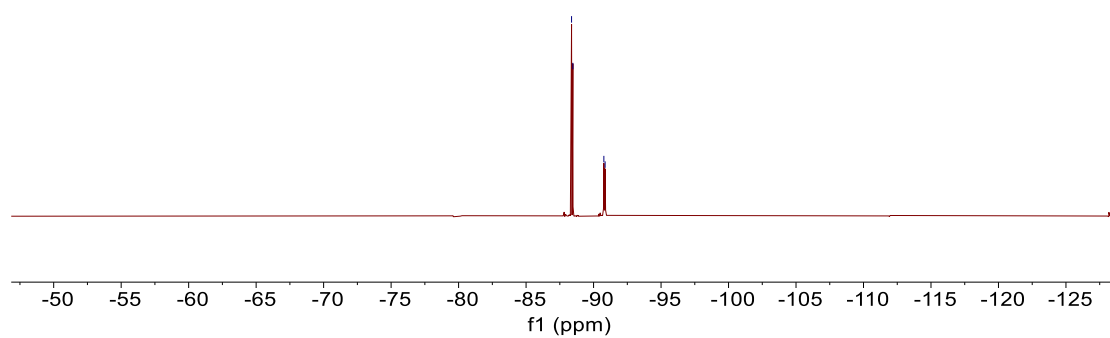

### 4-chloro-2-(3,3-difluoroallyl)-N-methoxybenzamide (5b)

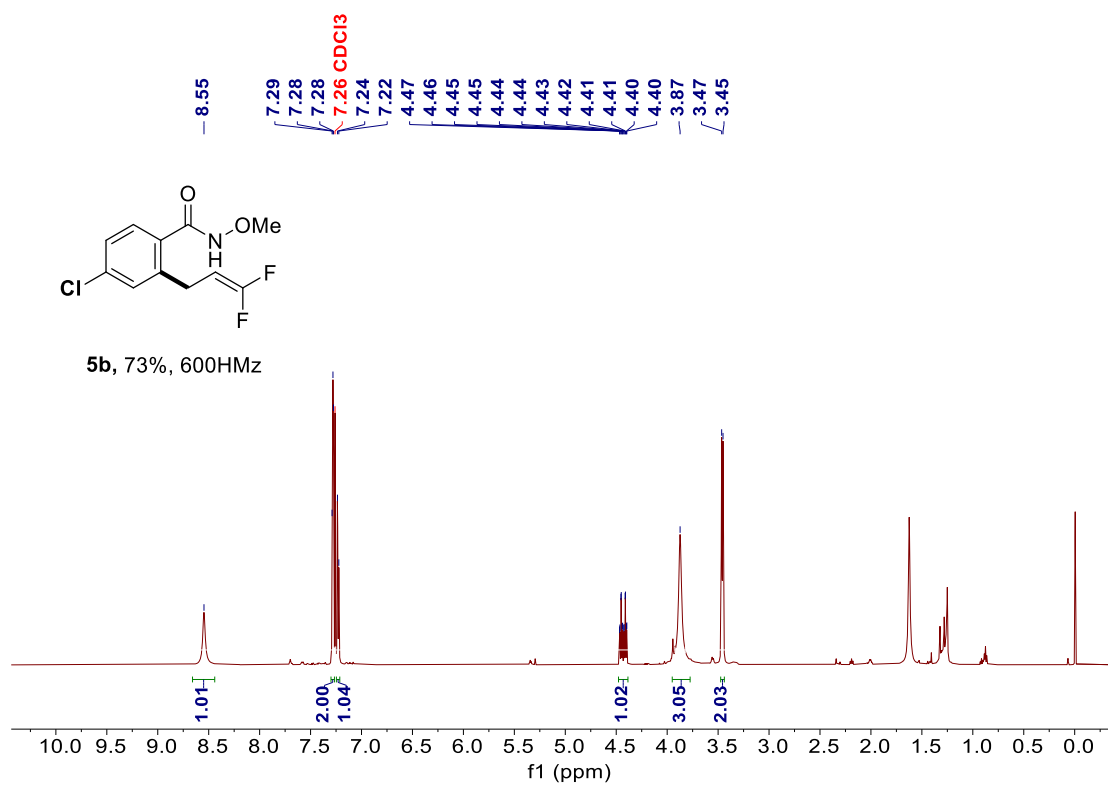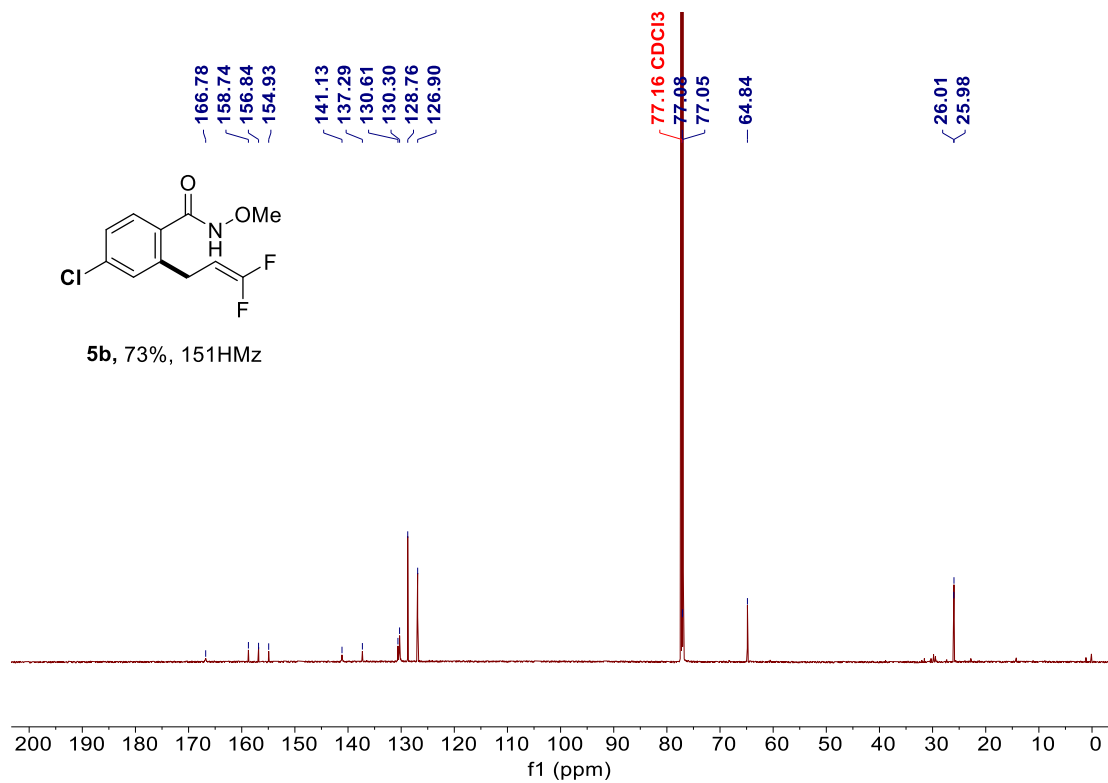

**<sup>19</sup>F NMR spectrum for product 5b**

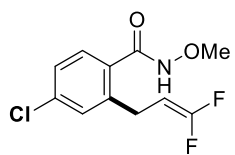

**5b, 73%, 565HMz**

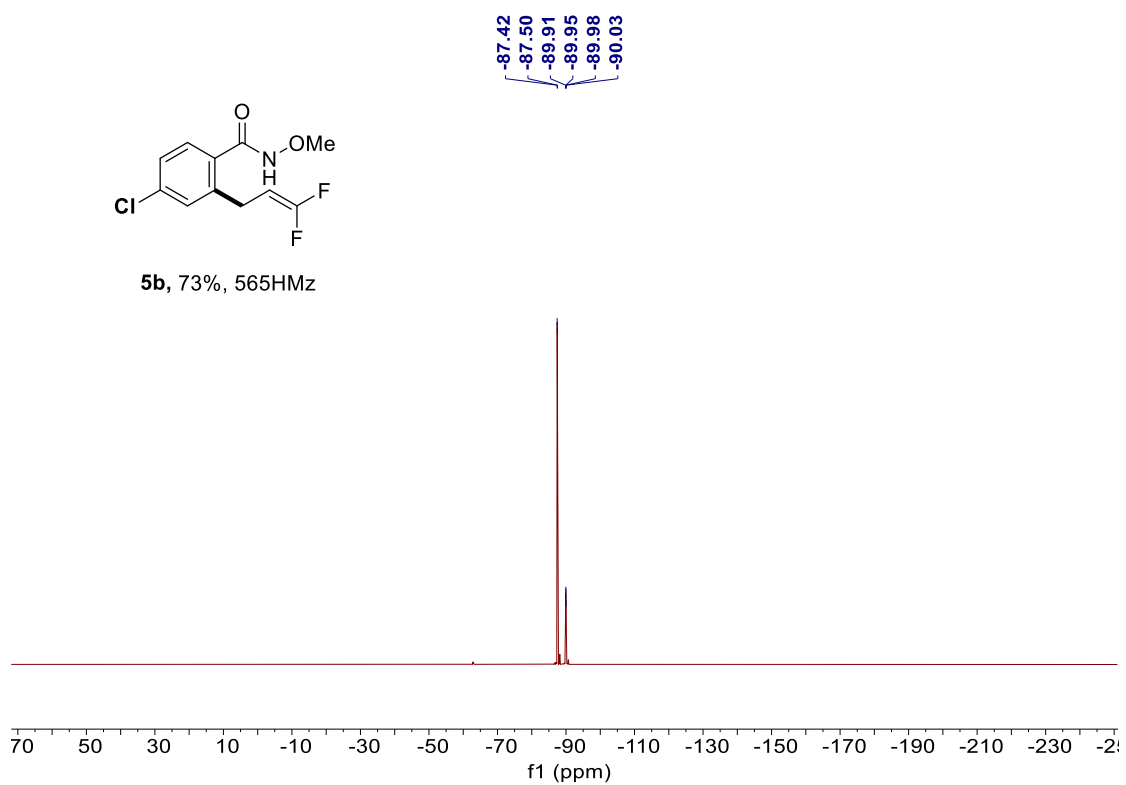

2-(3,3-difluoroallyl)-N,4-dimethoxybenzamide (5c)

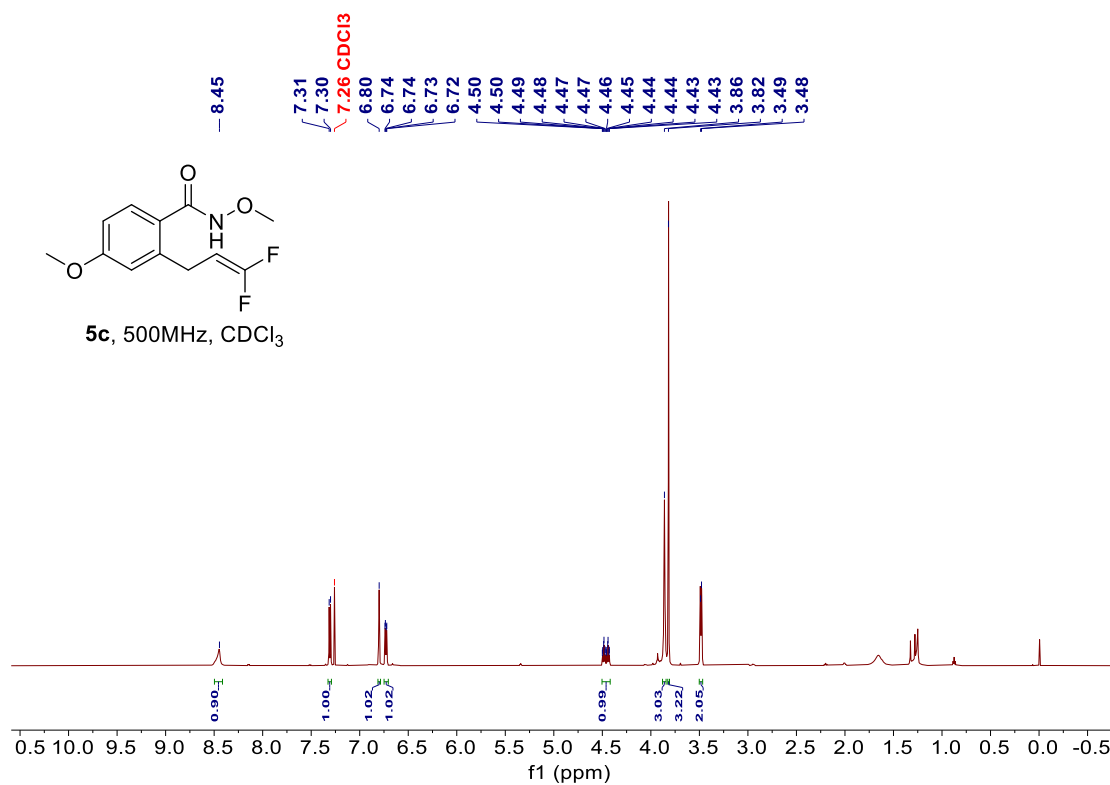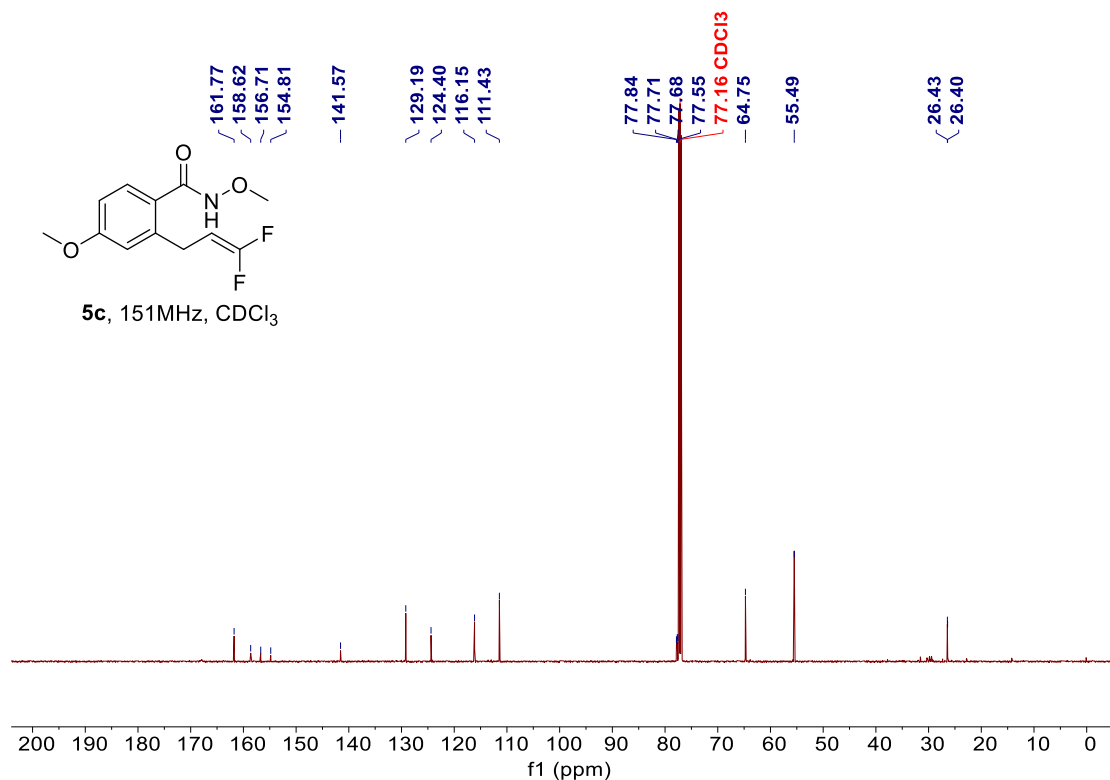

**<sup>19</sup>F NMR spectrum for product 5c**

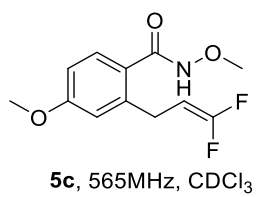

-88.31  
-88.39  
-90.74  
-90.79  
-90.82  
-90.87

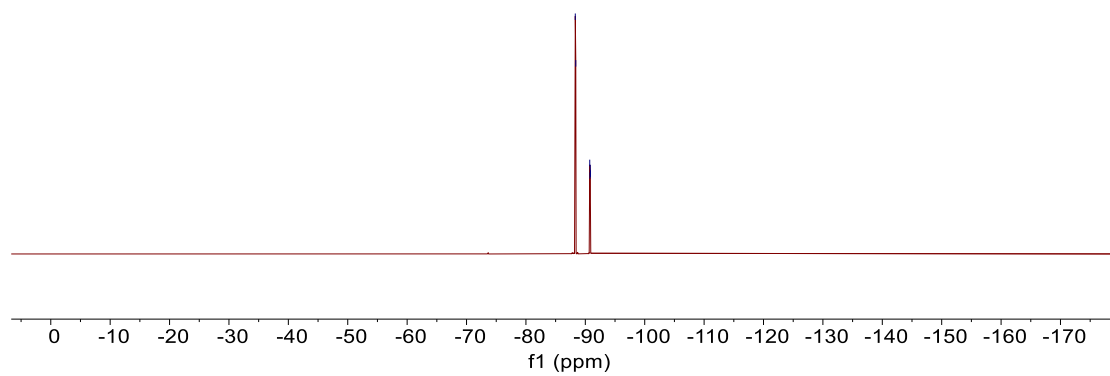

4-cyano-2-(3,3-difluoroallyl)-*N*-methoxybenzamide (5d)

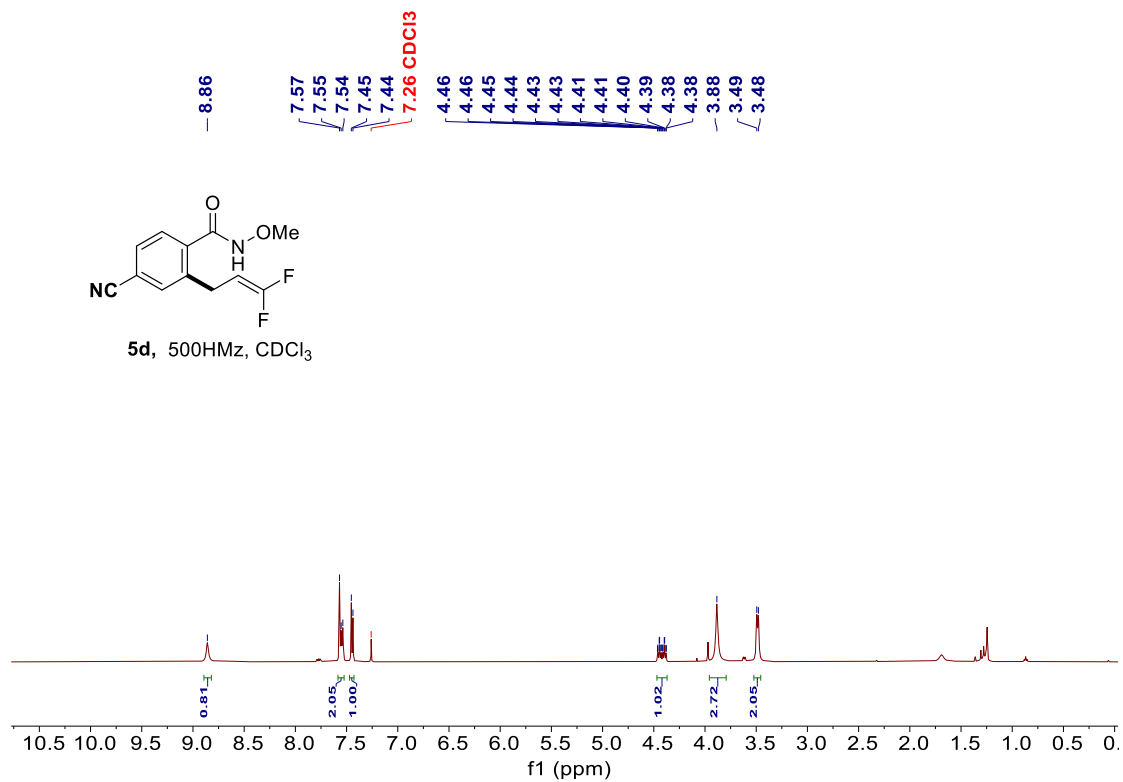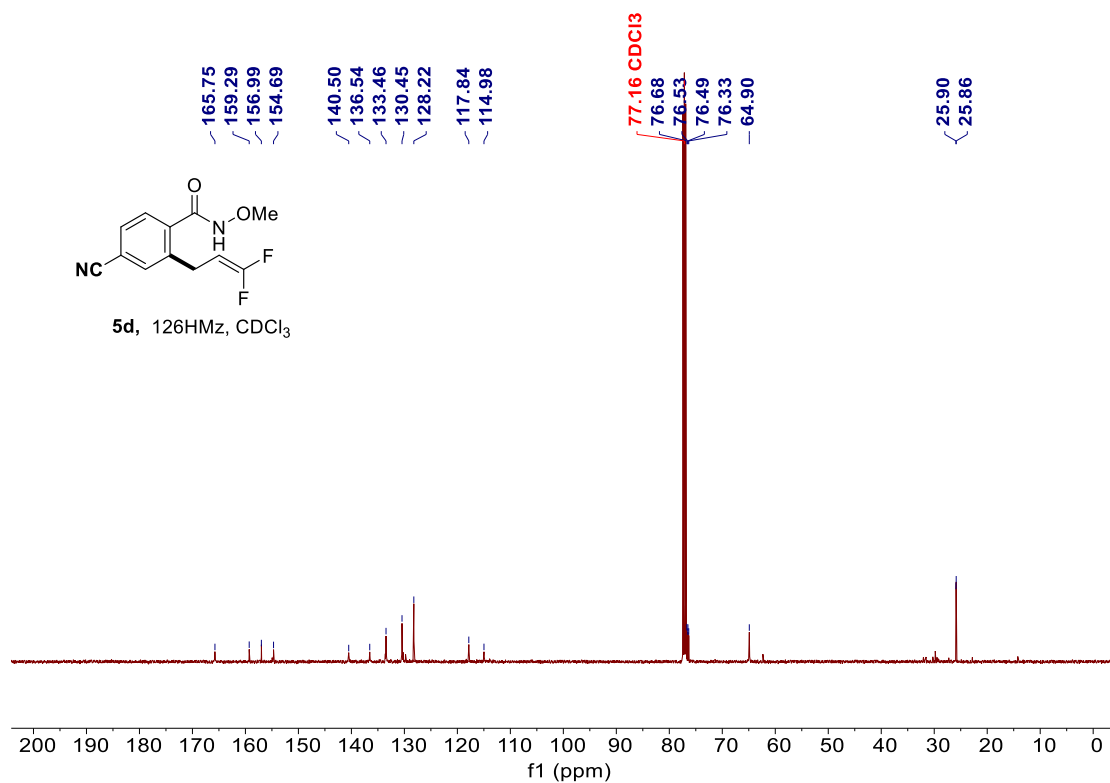



**<sup>19</sup>F NMR spectrum for product 5d**

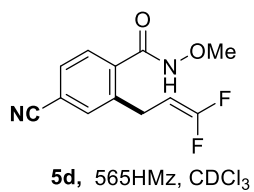

-86.52  
-86.60  
-89.06  
-89.10  
-89.13  
-89.18

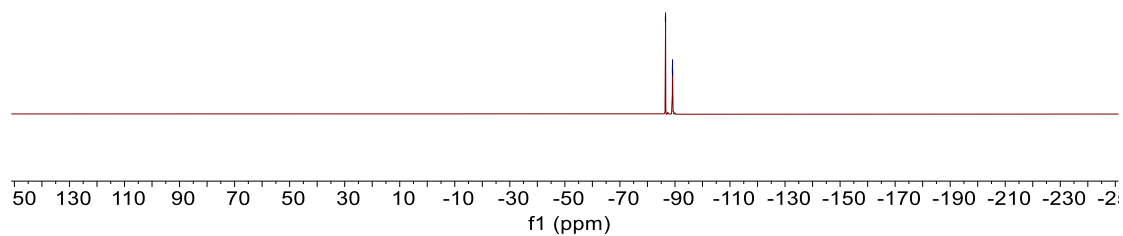

2-(3,3-difluoroallyl)-N-methoxy-6-methylbenzamide (5e)

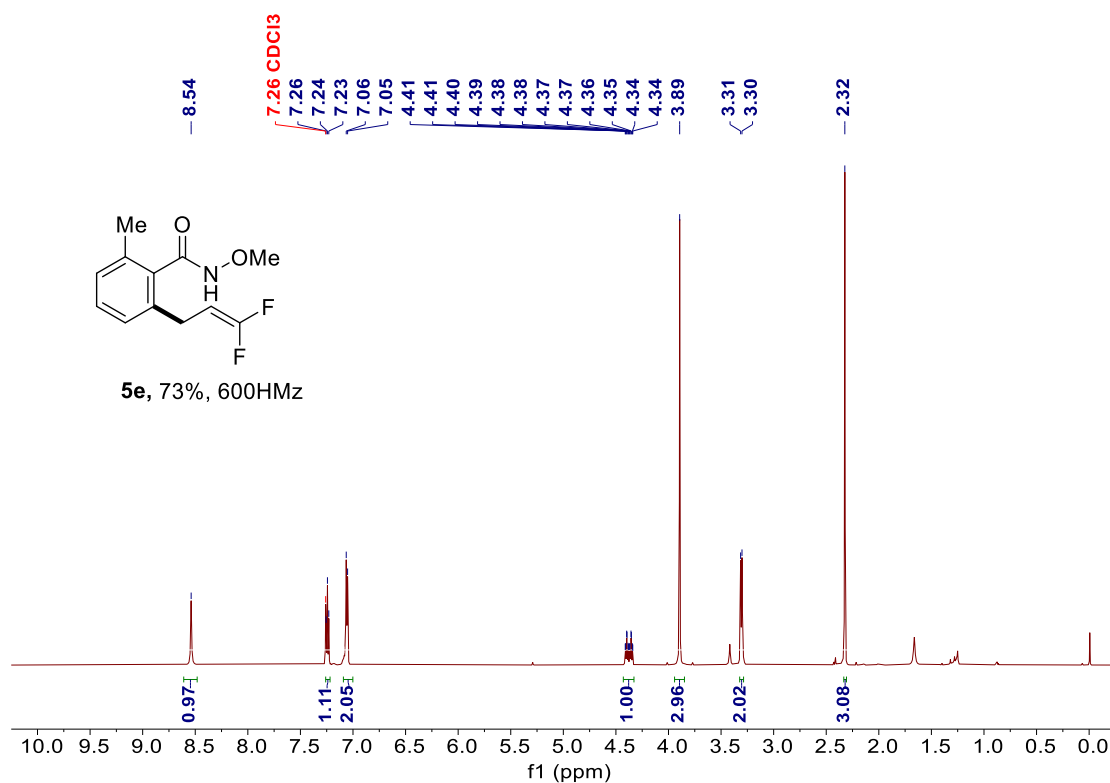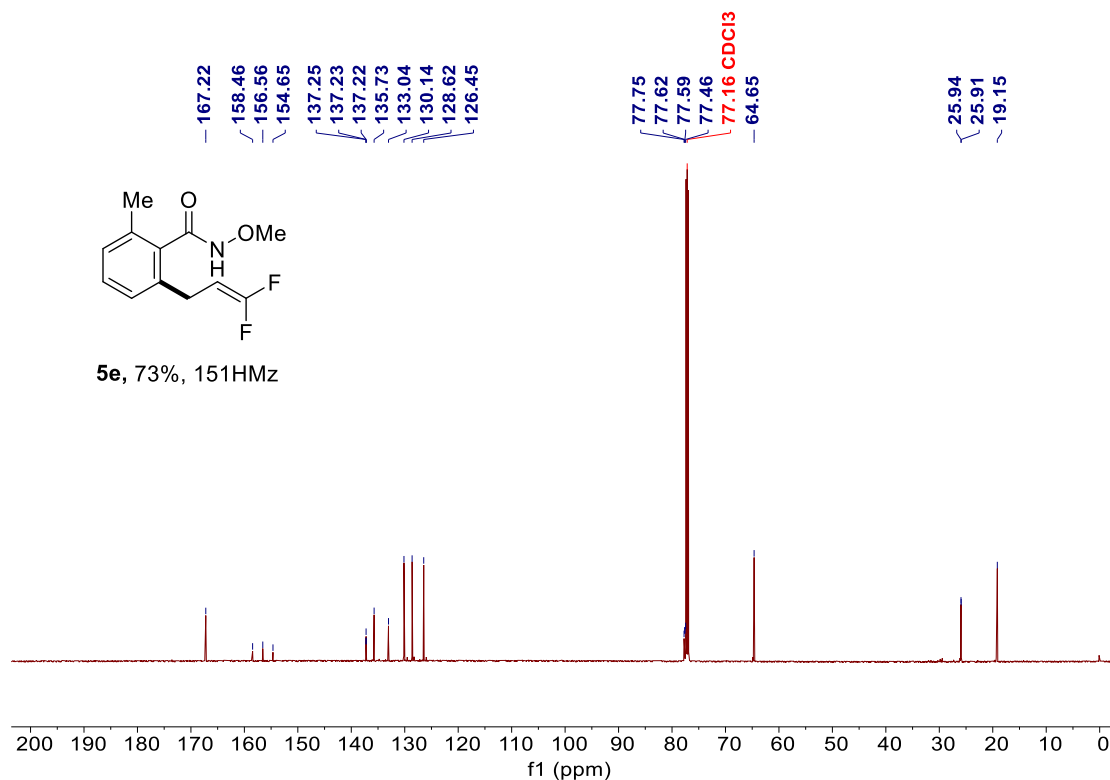

**<sup>19</sup>F NMR spectrum for product 5e**

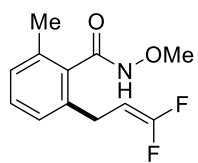

**5e**, 73%, 565HMz

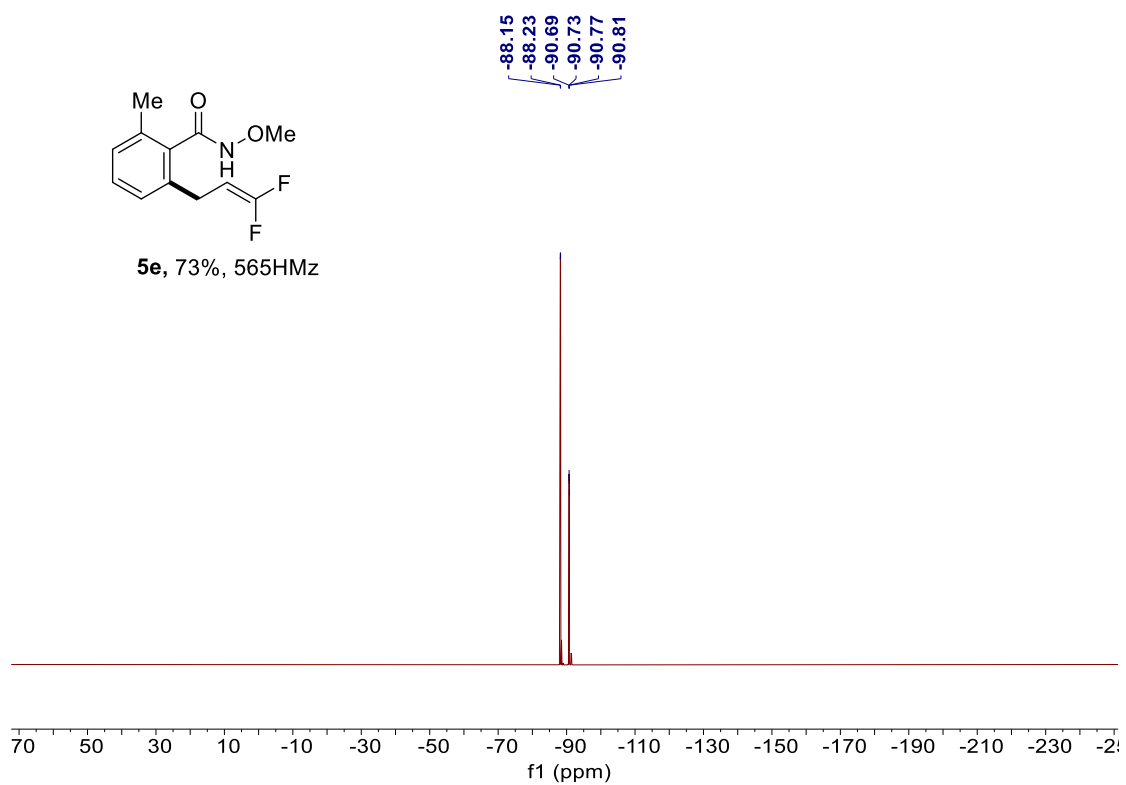

2-(3,3-difluoroallyl)-N-methoxy-5-methylbenzamide (5f)

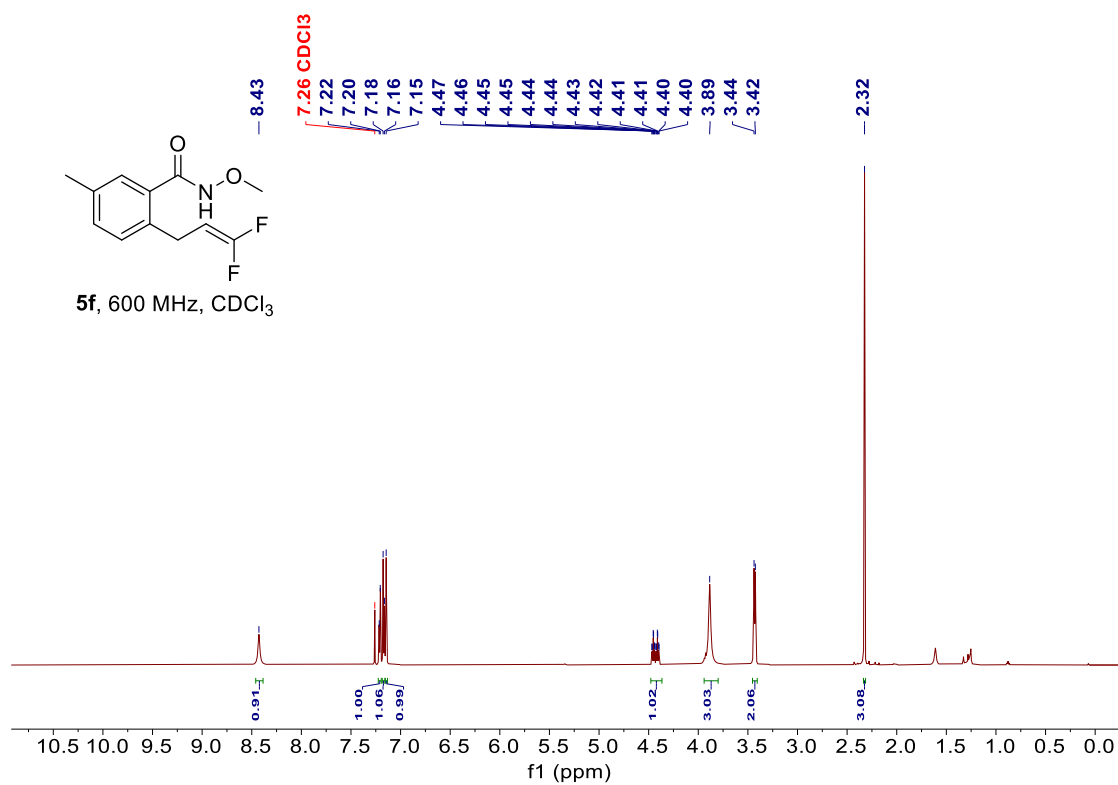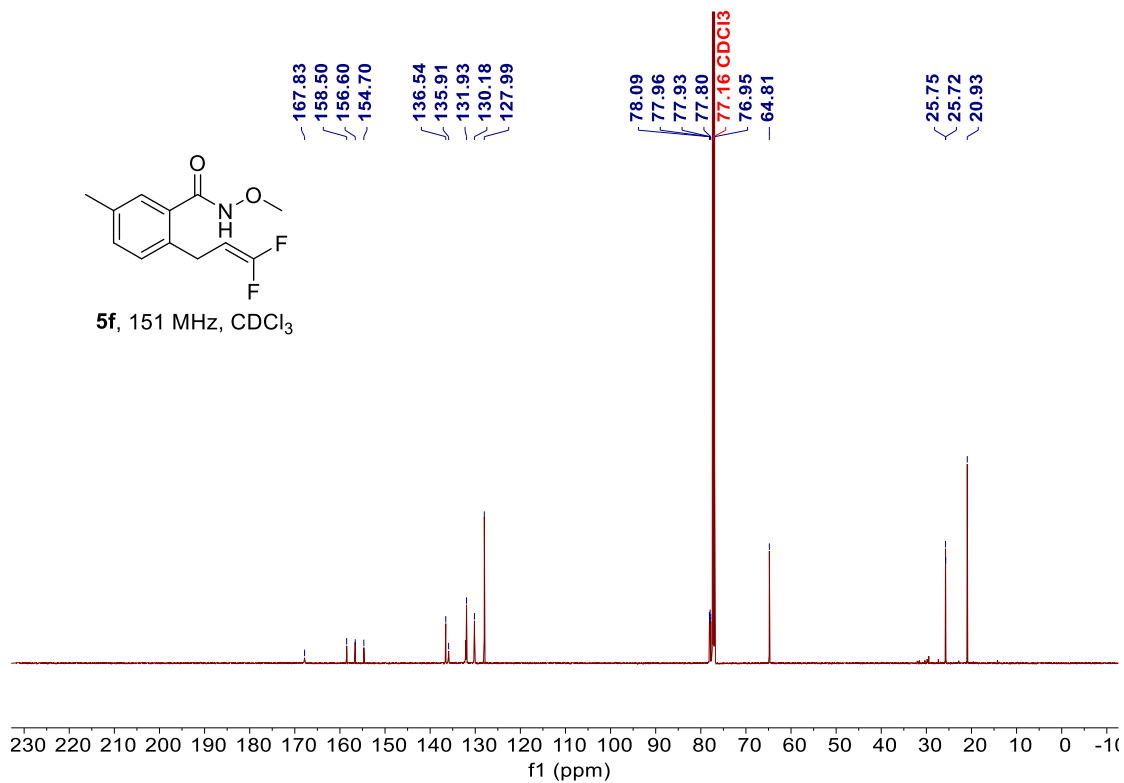

**<sup>19</sup>F NMR spectrum for product 5f**

-88.60  
-88.69  
-90.97  
-91.06

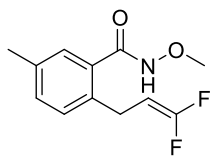

**5f**, 471 MHz, CDCl<sub>3</sub>

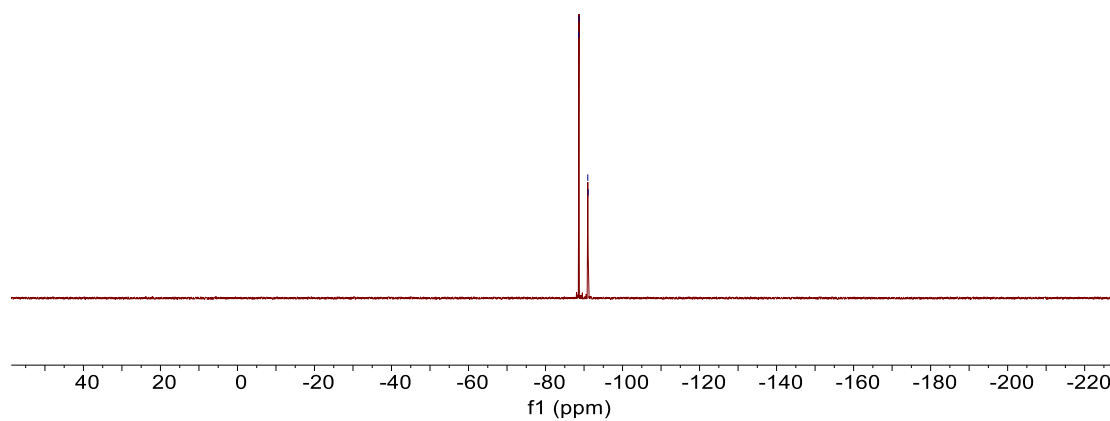

### 4-bromo-2-(3,3-difluoroallyl)-N-methoxybenzamide (5g)

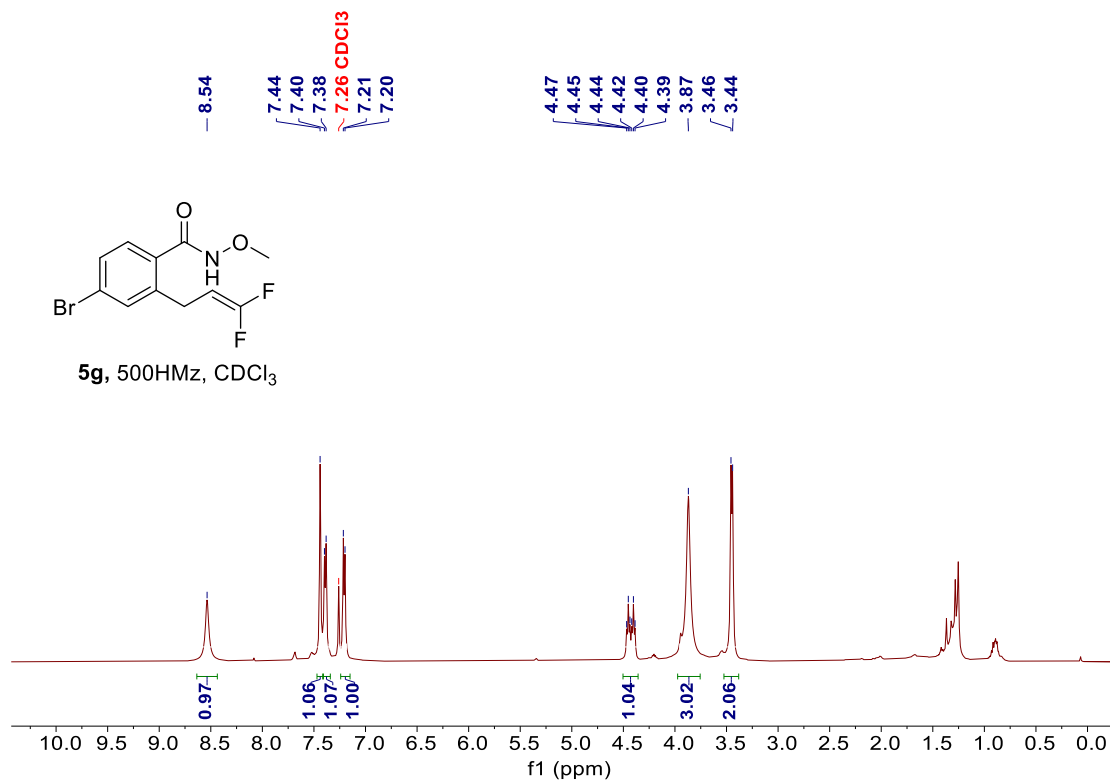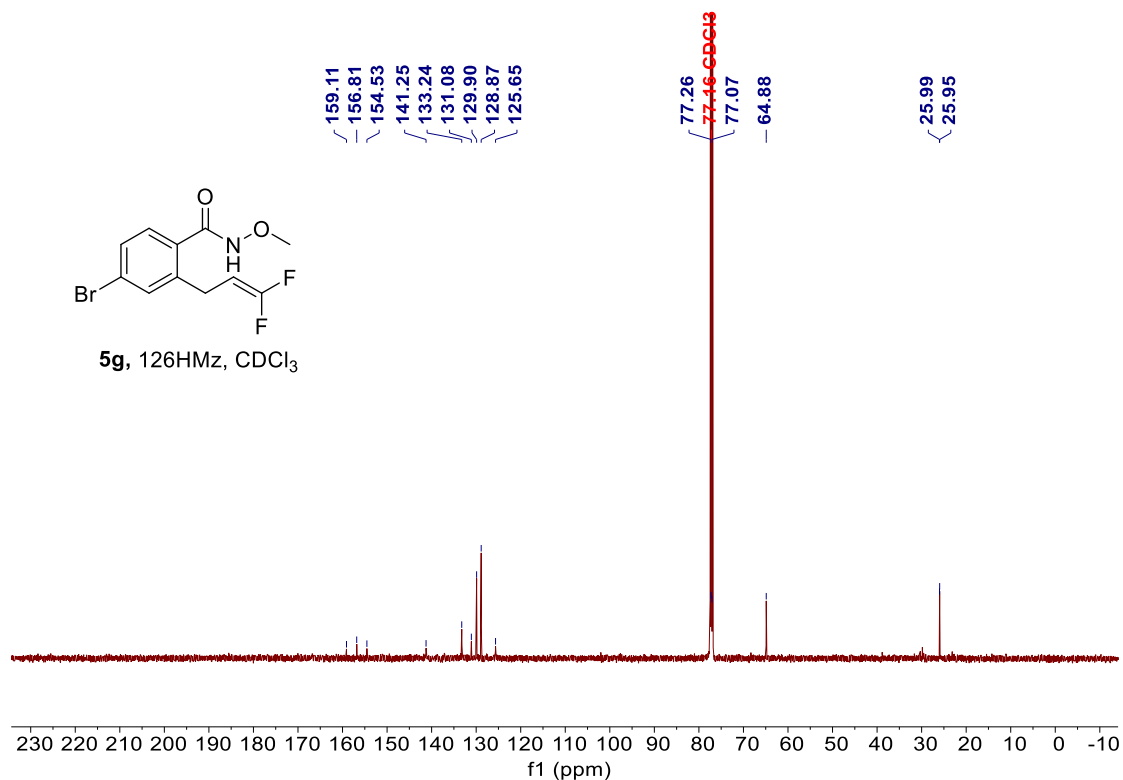

**<sup>19</sup>F NMR spectrum for product 5g**

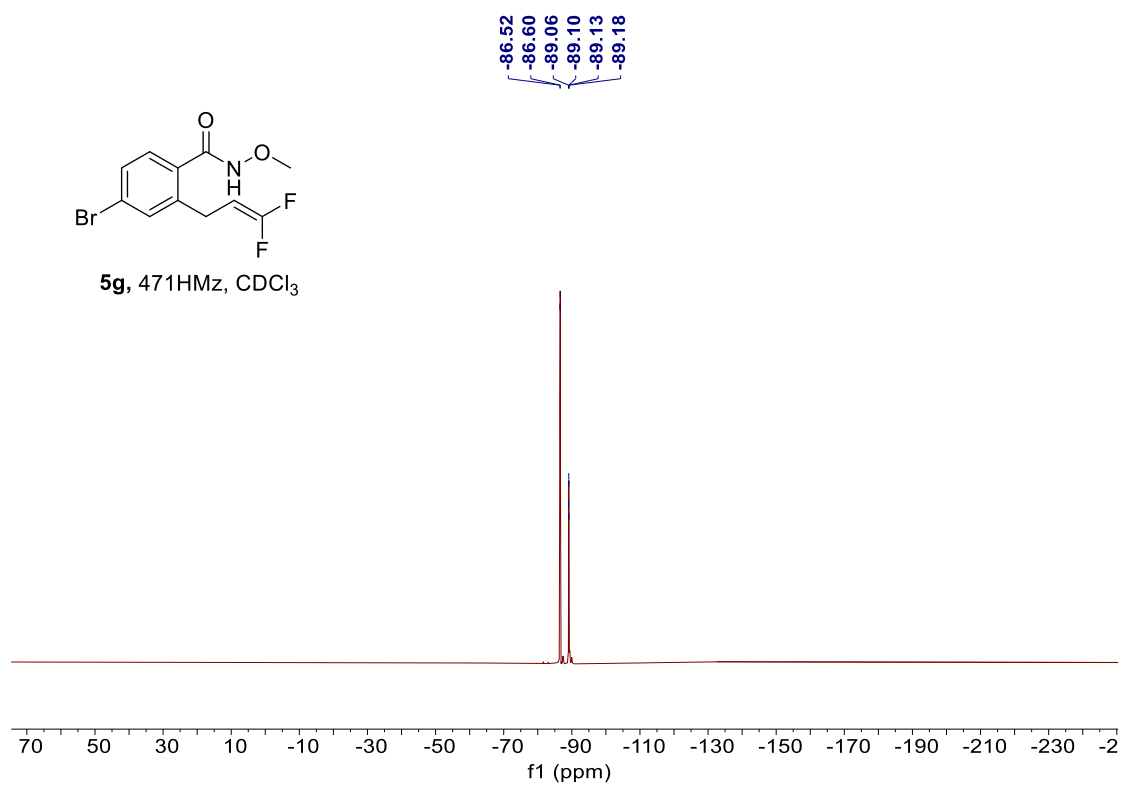

**(Z)-6,6-difluoro-2-phenylhexa-2,5-dienamide (6a)**

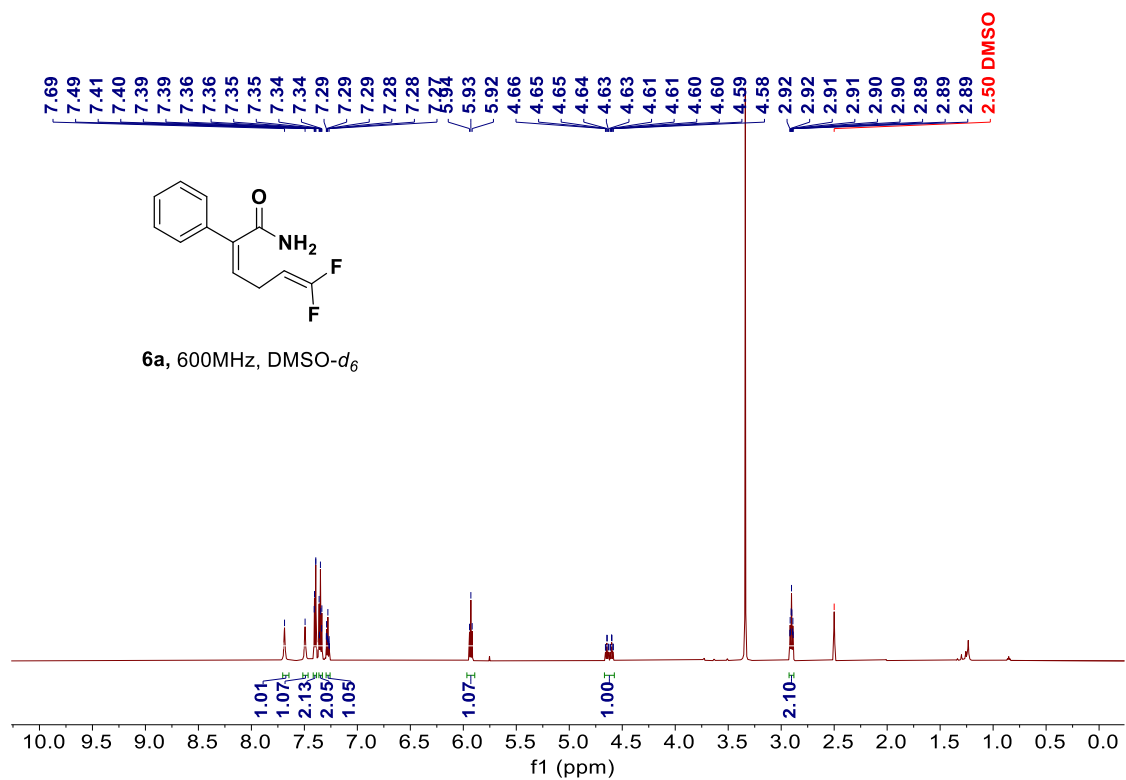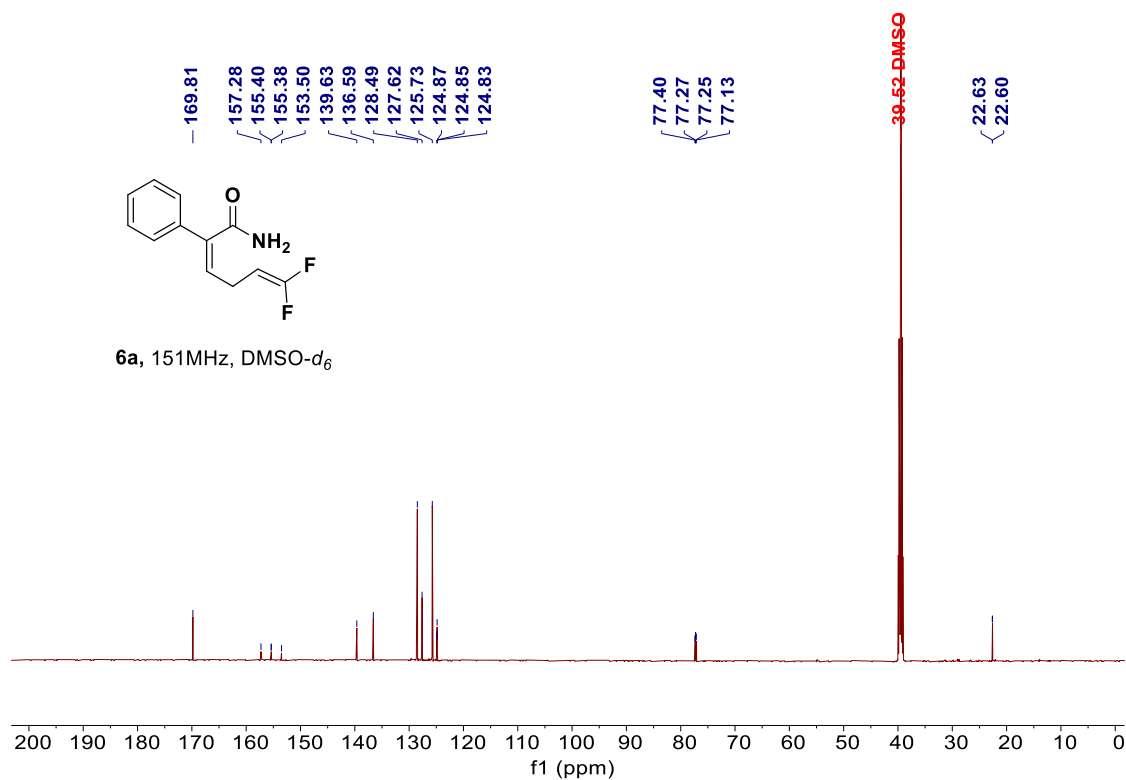



**<sup>19</sup>F NMR spectrum for product 6a**

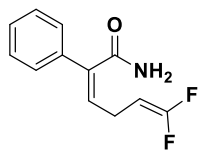

**6a**, 565MHz, DMSO-*d*<sub>6</sub>

-89.24  
-89.32  
-91.00  
-91.05  
-91.09  
-91.13

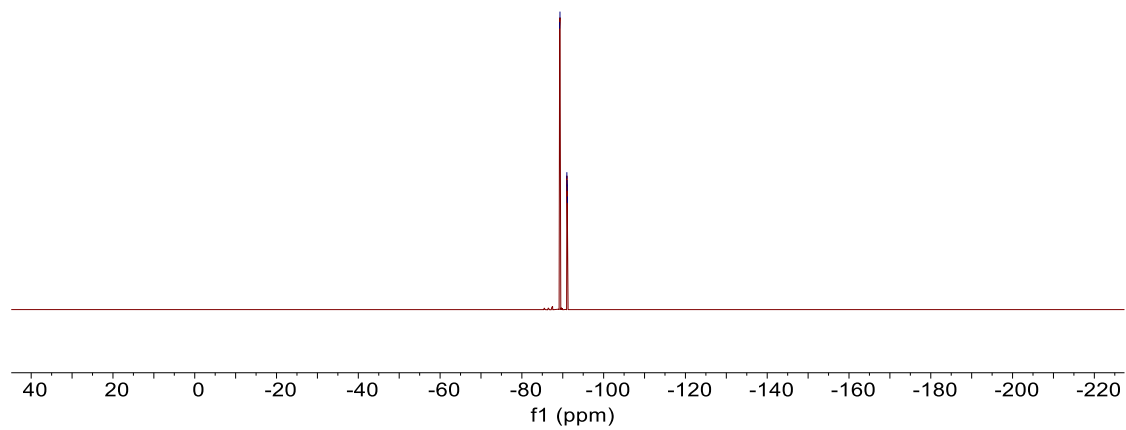

**(Z)-6,6-difluoro-N-methoxy-N-methyl-2-phenylhexa-2,5-dienamide (6b)**

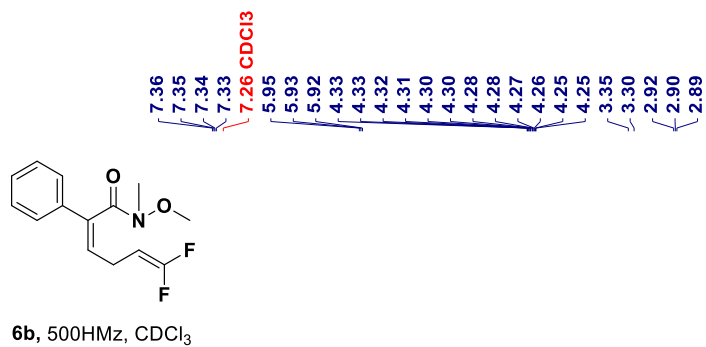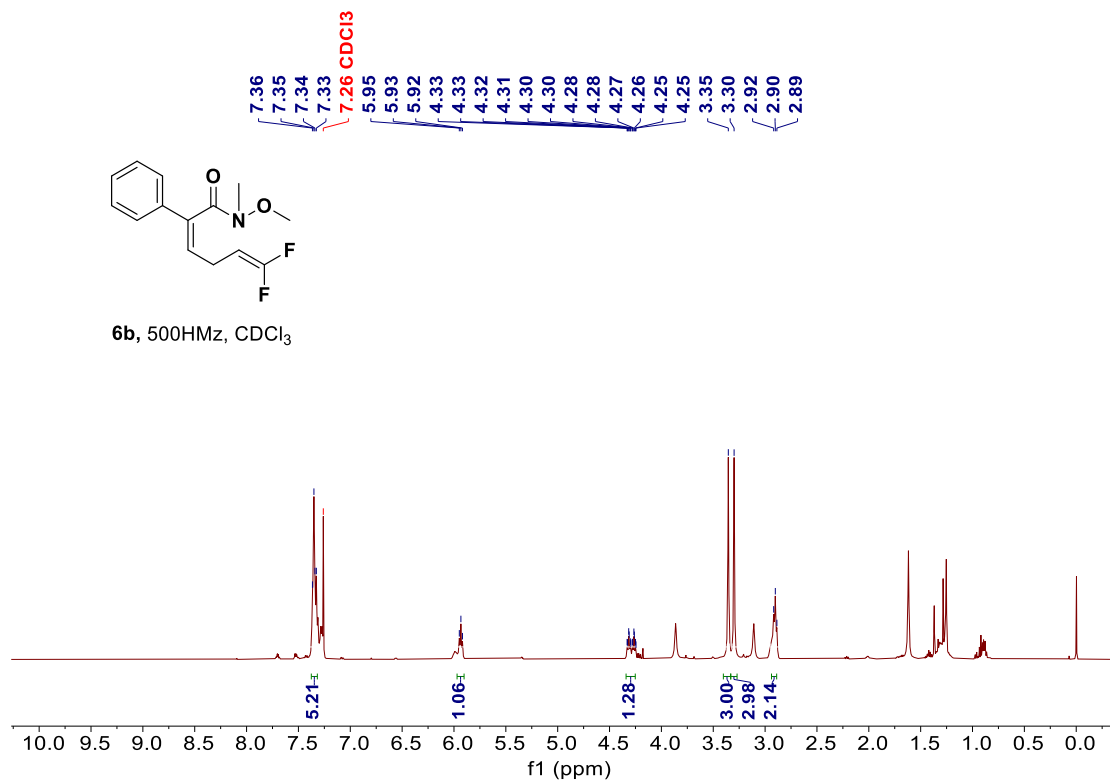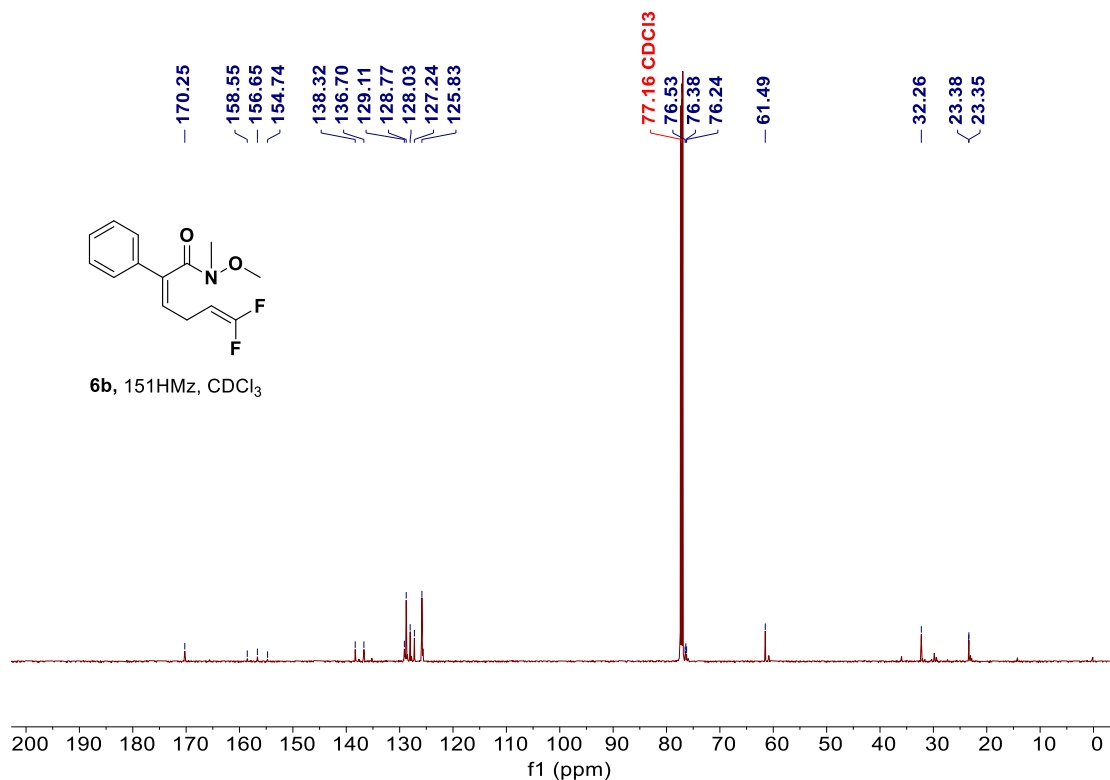

**<sup>19</sup>F NMR spectrum for product 6b**

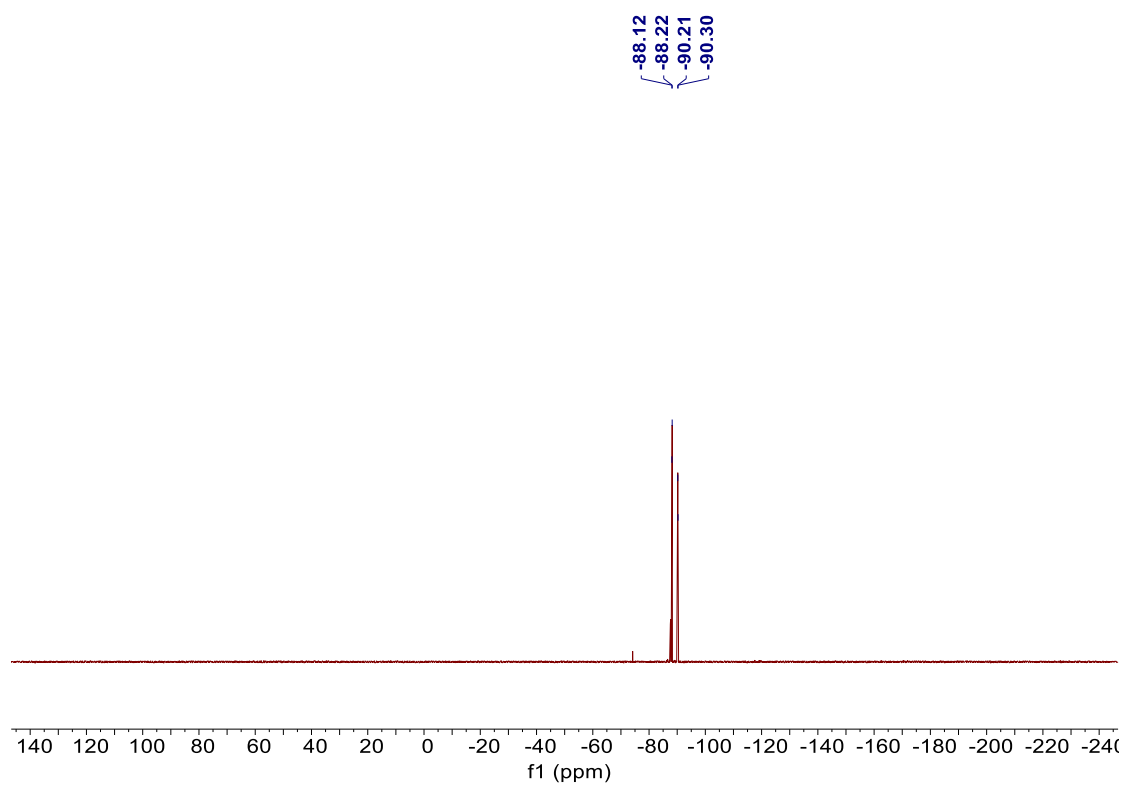

Supplement: d4cc03804e1.pdf [file d4cc03804e1.pdf]
